# Supplementary material
Source: publisher figshare collection journal article supplement (https://gsajournals.figshare.com/ndownloader/files/25320707)
Supplement: Supplementary file 1 [file 25320707]

## Sheet: GO_Biological_Process_HHLT-GAL4
#term ID	term description	observed gene count	background gene count	false discovery rate	matching proteins in your network (IDs)	matching proteins in your network (labels)
GO:0009987	cellular process	116	6847	1.1e-14	FBpp0070402,FBpp0070430,FBpp0070457,FBpp0070672,FBpp0071061,FBpp0071431,FBpp0071562,FBpp0071848,FBpp0071905,FBpp0072306,FBpp0072438,FBpp0072616,FBpp0072908,FBpp0073173,FBpp0073572,FBpp0073659,FBpp0073828,FBpp0073893,FBpp0073966,FBpp0074298,FBpp0074609,FBpp0074756,FBpp0074822,FBpp0074841,FBpp0074899,FBpp0076287,FBpp0076408,FBpp0076487,FBpp0076806,FBpp0077134,FBpp0077208,FBpp0077251,FBpp0077473,FBp…	AGO1,AP-2alpha,Akt1,Amph,Atg3,Atg6,Bap60,Bub3,CG10333,CG11920,CG11985,CG12264,CG16941,CG17737,CG2051,CG32547,CG33123,CG3806,CG4038,CG5660,CG5706,CG6094,CG6227,CG7794,CG8636,CG8728,CSN1b,CSN5,CSN6,Cctgamma,Cdc27,Cdk12,Cdk9,Chc,Cirl,Cngl,Cpsf100,Cul1,Dic61B,Dop1R1,Dp,EF2,Elf,Exo84,FANCI,Fer1HCH,HP6,Hsc70-4,Klp61F,Nsf2,Nup214,Nup358,Nup93-1,PCNA,Prosalpha7,Prp19,Rab35,Rab5,Ref1,Rep,RnrL,Rop,RpII33,R…
GO:0051641	cellular localization	42	880	1.1e-14	FBpp0070672,FBpp0071431,FBpp0071905,FBpp0072306,FBpp0073659,FBpp0073966,FBpp0074609,FBpp0076408,FBpp0076487,FBpp0077208,FBpp0077399,FBpp0077473,FBpp0078007,FBpp0078326,FBpp0079278,FBpp0079999,FBpp0080048,FBpp0080138,FBpp0082137,FBpp0082346,FBpp0082516,FBpp0083434,FBpp0083502,FBpp0083646,FBpp0083975,FBpp0084050,FBpp0084351,FBpp0085658,FBpp0085888,FBpp0087958,FBpp0088945,FBpp0089084,FBpp0292260,FBp…	AP-2alpha,AP-2mu,AP-2sigma,Atg6,CG8728,Chc,Cirl,Exo84,Fer1HCH,Fs(2)Ket,Hsc70-4,Nsf2,Nup214,Nup358,Nup93-1,Rab35,Rab5,Rep,Rop,Rph,Sec23,Sec5,Sec6,Sec8,Slh,Smg5,Syx18,Syx1A,Syx7,Trn-SR,Vha68-2,alphaSnap,beta'COP,cher,ctp,emb,mbo,msk,pbl,shi,slmb,zip
GO:0051649	establishment of localization in cell	38	716	1.1e-14	FBpp0070672,FBpp0071431,FBpp0071905,FBpp0073659,FBpp0073966,FBpp0074609,FBpp0076408,FBpp0077208,FBpp0077399,FBpp0077473,FBpp0078007,FBpp0078326,FBpp0079278,FBpp0079999,FBpp0080048,FBpp0080138,FBpp0082137,FBpp0082346,FBpp0082516,FBpp0083502,FBpp0083646,FBpp0083975,FBpp0084050,FBpp0084351,FBpp0085658,FBpp0085888,FBpp0087958,FBpp0088945,FBpp0292260,FBpp0293235,FBpp0294035,FBpp0301099,FBpp0302596,FBp…	AP-2alpha,AP-2mu,AP-2sigma,Atg6,CG8728,Chc,Cirl,Exo84,Fer1HCH,Fs(2)Ket,Hsc70-4,Nsf2,Nup214,Nup358,Nup93-1,Rab35,Rab5,Rep,Rop,Rph,Sec23,Sec5,Sec6,Sec8,Smg5,Syx18,Syx1A,Syx7,Trn-SR,Vha68-2,alphaSnap,beta'COP,cher,ctp,emb,mbo,msk,shi
GO:0046907	intracellular transport	35	607	1.52e-14	FBpp0070672,FBpp0071431,FBpp0071905,FBpp0073659,FBpp0073966,FBpp0074609,FBpp0076408,FBpp0077208,FBpp0077399,FBpp0077473,FBpp0078007,FBpp0078326,FBpp0079278,FBpp0079999,FBpp0080048,FBpp0080138,FBpp0082137,FBpp0082346,FBpp0083502,FBpp0083646,FBpp0083975,FBpp0084050,FBpp0084351,FBpp0085658,FBpp0085888,FBpp0087958,FBpp0088945,FBpp0292260,FBpp0293235,FBpp0294035,FBpp0301099,FBpp0302752,FBpp0304475,FBp…	AP-2alpha,AP-2mu,AP-2sigma,Atg6,CG8728,Chc,Exo84,Fs(2)Ket,Nsf2,Nup214,Nup358,Nup93-1,Rab35,Rab5,Rep,Rop,Rph,Sec23,Sec5,Sec6,Sec8,Smg5,Syx18,Syx1A,Syx7,Trn-SR,Vha68-2,alphaSnap,beta'COP,cher,ctp,emb,mbo,msk,shi
GO:0065007	biological regulation	91	4357	1.92e-14	FBpp0070402,FBpp0070672,FBpp0071061,FBpp0071431,FBpp0071848,FBpp0071905,FBpp0072306,FBpp0072616,FBpp0073173,FBpp0073572,FBpp0073659,FBpp0073966,FBpp0074298,FBpp0074609,FBpp0074756,FBpp0074841,FBpp0074899,FBpp0076287,FBpp0076408,FBpp0076487,FBpp0076806,FBpp0077134,FBpp0077208,FBpp0077251,FBpp0077399,FBpp0077473,FBpp0077941,FBpp0078007,FBpp0078013,FBpp0078318,FBpp0078326,FBpp0079278,FBpp0079648,FBp…	AGO1,AP-2alpha,Akt1,Amph,Bap60,Bub3,CG10333,CG11985,CG2051,CG32547,CG33123,CG3806,CG5660,CG5706,CG6094,CSN1b,CSN5,CSN6,Cdk12,Cdk9,Chc,Cirl,Cngl,Cul1,CycK,Dop1R1,Dp,Exo84,Fer1HCH,HP6,Hsc70-4,Klp61F,Nsf2,Nup214,Nup358,Nup93-1,PCNA,Prp19,Rab35,Rab5,Rep,RnrL,Rop,Rpd3,Rph,SMC2,SNF4Agamma,Sec23,Sec5,Sec6,Sec8,Side,Slh,Smg5,Snmp1,Syx1A,Syx7,TER94,Tango7,Trn-SR,Tsp47F,Vha55,Vha68-2,alien,alphaSnap,beta'C…
GO:0008104	protein localization	34	580	1.97e-14	FBpp0071431,FBpp0071905,FBpp0072306,FBpp0072616,FBpp0073659,FBpp0073966,FBpp0074609,FBpp0076408,FBpp0076487,FBpp0077208,FBpp0077399,FBpp0078007,FBpp0078326,FBpp0079278,FBpp0080048,FBpp0080138,FBpp0082137,FBpp0082568,FBpp0083502,FBpp0083646,FBpp0083975,FBpp0084351,FBpp0085658,FBpp0085888,FBpp0086705,FBpp0086941,FBpp0087958,FBpp0088945,FBpp0292260,FBpp0293235,FBpp0294035,FBpp0301099,FBpp0304475,FBp…	AP-2alpha,AP-2mu,AP-2sigma,Amph,Atg6,CG8728,Chc,Exo84,Fs(2)Ket,Klp61F,Nup214,Nup358,Nup93-1,Rep,Rph,Sec23,Sec5,Sec6,Sec8,Smg5,Syx1A,Syx7,Tango7,Trn-SR,alphaSnap,beta'COP,cher,emb,ldlCp,mbo,msk,pbl,shi,zip
GO:0033036	macromolecule localization	37	738	6.66e-14	FBpp0071431,FBpp0071905,FBpp0072306,FBpp0072616,FBpp0073659,FBpp0073966,FBpp0074609,FBpp0076408,FBpp0076487,FBpp0077208,FBpp0077399,FBpp0078007,FBpp0078326,FBpp0079278,FBpp0080048,FBpp0080138,FBpp0082137,FBpp0082568,FBpp0083434,FBpp0083502,FBpp0083646,FBpp0083975,FBpp0084351,FBpp0084900,FBpp0085658,FBpp0085888,FBpp0086705,FBpp0086941,FBpp0087958,FBpp0088945,FBpp0290803,FBpp0292260,FBpp0293235,FBp…	AP-2alpha,AP-2mu,AP-2sigma,Amph,Atg6,CG8728,Chc,Exo84,Fs(2)Ket,Klp61F,Nup214,Nup358,Nup93-1,Rep,Rph,SNF4Agamma,Sec23,Sec5,Sec6,Sec8,Smg5,Syx1A,Syx7,Tango7,Trn-SR,alphaSnap,beta'COP,cher,emb,ldlCp,mbo,msk,ncd,pbl,shi,slmb,zip
GO:0015031	protein transport	28	388	9.25e-14	FBpp0071431,FBpp0071905,FBpp0072616,FBpp0073659,FBpp0073966,FBpp0074609,FBpp0076408,FBpp0077208,FBpp0077399,FBpp0078007,FBpp0078326,FBpp0079278,FBpp0080048,FBpp0080138,FBpp0082137,FBpp0082568,FBpp0083502,FBpp0083646,FBpp0083975,FBpp0085658,FBpp0085888,FBpp0086705,FBpp0087958,FBpp0088945,FBpp0292260,FBpp0293235,FBpp0294035,FBpp0301099	AP-2alpha,AP-2mu,AP-2sigma,Atg6,CG8728,Chc,Fs(2)Ket,Klp61F,Nup214,Nup358,Nup93-1,Rep,Rph,Sec23,Sec5,Sec6,Sec8,Smg5,Syx1A,Syx7,Tango7,Trn-SR,alphaSnap,beta'COP,emb,ldlCp,mbo,msk
GO:0032940	secretion by cell	20	170	3.15e-13	FBpp0071431,FBpp0072616,FBpp0073966,FBpp0074609,FBpp0077208,FBpp0078007,FBpp0078326,FBpp0082346,FBpp0082516,FBpp0083975,FBpp0084351,FBpp0085658,FBpp0085888,FBpp0086705,FBpp0086941,FBpp0089084,FBpp0292260,FBpp0302596,FBpp0302752,FBpp0305729	Amph,Atg6,Chc,Cirl,Exo84,Hsc70-4,Klp61F,Nsf2,Rab35,Rep,Rop,Rph,Sec5,Sec6,Sec8,Slh,Syx1A,Syx7,Tango7,alphaSnap
GO:0071840	cellular component organization or biogenesis	69	2753	3.15e-13	FBpp0070402,FBpp0070672,FBpp0071061,FBpp0071562,FBpp0072306,FBpp0072616,FBpp0072908,FBpp0073173,FBpp0073659,FBpp0073966,FBpp0074298,FBpp0074609,FBpp0074756,FBpp0074822,FBpp0074899,FBpp0076408,FBpp0076487,FBpp0076806,FBpp0077134,FBpp0077208,FBpp0077473,FBpp0078007,FBpp0078318,FBpp0078326,FBpp0079278,FBpp0079677,FBpp0079680,FBpp0079874,FBpp0079999,FBpp0080138,FBpp0082137,FBpp0082346,FBpp0082516,FBp…	AGO1,AP-2alpha,Akt1,Amph,Atg3,Atg6,CG11920,CG12264,CG16941,CG17737,CG2051,CG4038,CG6094,CG7794,CG8728,CSN5,Chc,Dp,Elf,Exo84,HP6,Hsc70-4,Klp61F,Nsf2,Nup358,Nup93-1,PCNA,Prp19,Rab35,Rab5,Rop,Rpd3,Rpn6,SMC2,Sec23,Sec5,Sec6,Sec8,Slh,Smg5,Syx18,Syx1A,Syx7,TER94,Tango7,Vha68-2,alphaSnap,cher,chico,crn,ctp,dpr2,eRF1,emb,hid,ldlCp,mbo,msk,mys,ncd,pbl,rept,scny,shark,shi,slmb,wupA,zfh1,zip
GO:0065008	regulation of biological quality	46	1285	7.11e-13	FBpp0071061,FBpp0071431,FBpp0071905,FBpp0072306,FBpp0073659,FBpp0073966,FBpp0074298,FBpp0074609,FBpp0074841,FBpp0076287,FBpp0076487,FBpp0077134,FBpp0077208,FBpp0077251,FBpp0077473,FBpp0077941,FBpp0078007,FBpp0078326,FBpp0079677,FBpp0079999,FBpp0080048,FBpp0080138,FBpp0082137,FBpp0082139,FBpp0082346,FBpp0082516,FBpp0082682,FBpp0082743,FBpp0083658,FBpp0084021,FBpp0084351,FBpp0085658,FBpp0085888,FBp…	Akt1,CG33123,CG5660,CG5706,CSN1b,CSN5,CSN6,Chc,Cirl,Cngl,Dop1R1,Exo84,Fer1HCH,HP6,Hsc70-4,Nsf2,Nup214,Nup93-1,Rab5,Rep,Rop,Rph,SNF4Agamma,Sec23,Sec5,Sec6,Sec8,Smg5,Snmp1,Syx1A,Syx7,TER94,Vha55,Vha68-2,alien,alphaSnap,beta'COP,chico,kni,mbo,mys,pbl,shark,shi,wupA,zip
GO:0034613	cellular protein localization	28	447	1.44e-12	FBpp0071431,FBpp0071905,FBpp0072306,FBpp0073659,FBpp0073966,FBpp0074609,FBpp0076408,FBpp0076487,FBpp0077208,FBpp0077399,FBpp0078007,FBpp0078326,FBpp0079278,FBpp0080048,FBpp0080138,FBpp0082137,FBpp0083502,FBpp0083646,FBpp0084351,FBpp0085658,FBpp0085888,FBpp0087958,FBpp0088945,FBpp0292260,FBpp0293235,FBpp0294035,FBpp0301099,FBpp0305866	AP-2alpha,AP-2mu,AP-2sigma,CG8728,Chc,Exo84,Fs(2)Ket,Nup214,Nup358,Nup93-1,Rep,Rph,Sec23,Sec5,Sec6,Sec8,Smg5,Syx1A,Syx7,Trn-SR,alphaSnap,beta'COP,emb,mbo,msk,pbl,shi,zip
GO:0070727	cellular macromolecule localization	29	502	2.85e-12	FBpp0071431,FBpp0071905,FBpp0072306,FBpp0073659,FBpp0073966,FBpp0074609,FBpp0076408,FBpp0076487,FBpp0077208,FBpp0077399,FBpp0078007,FBpp0078326,FBpp0079278,FBpp0080048,FBpp0080138,FBpp0082137,FBpp0083434,FBpp0083502,FBpp0083646,FBpp0084351,FBpp0085658,FBpp0085888,FBpp0087958,FBpp0088945,FBpp0292260,FBpp0293235,FBpp0294035,FBpp0301099,FBpp0305866	AP-2alpha,AP-2mu,AP-2sigma,CG8728,Chc,Exo84,Fs(2)Ket,Nup214,Nup358,Nup93-1,Rep,Rph,Sec23,Sec5,Sec6,Sec8,Smg5,Syx1A,Syx7,Trn-SR,alphaSnap,beta'COP,emb,mbo,msk,pbl,shi,slmb,zip
GO:0007276	gamete generation	38	916	3.3e-12	FBpp0070672,FBpp0071061,FBpp0072306,FBpp0072438,FBpp0073173,FBpp0073659,FBpp0073966,FBpp0074841,FBpp0077134,FBpp0077208,FBpp0077473,FBpp0078326,FBpp0079677,FBpp0081484,FBpp0082516,FBpp0082682,FBpp0082743,FBpp0082817,FBpp0083434,FBpp0083658,FBpp0083683,FBpp0084351,FBpp0084900,FBpp0085063,FBpp0085619,FBpp0085888,FBpp0086382,FBpp0086705,FBpp0086853,FBpp0087926,FBpp0088945,FBpp0089041,FBpp0111818,FBp…	AGO1,AP-2alpha,Akt1,CG11985,CG16941,CSN1b,CSN5,CSN6,Chc,Dic61B,Dp,Exo84,HP6,Hsc70-4,Nup93-1,PCNA,Prosalpha7,Rab5,Rop,Rpd3,Sec5,Sec6,Sec8,T-cp1,TER94,Tango7,alien,cher,chico,ctp,drosha,mys,ncd,shark,shi,slmb,zfh1,zip
GO:0016043	cellular component organization	65	2606	3.3e-12	FBpp0070402,FBpp0070672,FBpp0071061,FBpp0072306,FBpp0072616,FBpp0072908,FBpp0073173,FBpp0073659,FBpp0073966,FBpp0074298,FBpp0074609,FBpp0074756,FBpp0074822,FBpp0074899,FBpp0076408,FBpp0076487,FBpp0076806,FBpp0077134,FBpp0077208,FBpp0077473,FBpp0078007,FBpp0078318,FBpp0078326,FBpp0079278,FBpp0079677,FBpp0079680,FBpp0079874,FBpp0079999,FBpp0080138,FBpp0082346,FBpp0082516,FBpp0082568,FBpp0082682,FBp…	AGO1,AP-2alpha,Akt1,Amph,Atg3,Atg6,CG12264,CG16941,CG17737,CG2051,CG6094,CG7794,CG8728,CSN5,Chc,Dp,Elf,Exo84,HP6,Hsc70-4,Klp61F,Nsf2,Nup358,Nup93-1,PCNA,Prp19,Rab5,Rop,Rpd3,Rpn6,SMC2,Sec23,Sec5,Sec6,Sec8,Slh,Smg5,Syx18,Syx1A,Syx7,TER94,Tango7,Vha68-2,alphaSnap,cher,chico,crn,ctp,dpr2,eRF1,emb,hid,ldlCp,msk,mys,ncd,pbl,rept,scny,shark,shi,slmb,wupA,zfh1,zip
GO:0016192	vesicle-mediated transport	28	470	3.54e-12	FBpp0071431,FBpp0073966,FBpp0074609,FBpp0077208,FBpp0077473,FBpp0078007,FBpp0078326,FBpp0079999,FBpp0080048,FBpp0082346,FBpp0082516,FBpp0082568,FBpp0083502,FBpp0083646,FBpp0083975,FBpp0084050,FBpp0084351,FBpp0085658,FBpp0085888,FBpp0086382,FBpp0086941,FBpp0088945,FBpp0089084,FBpp0292260,FBpp0302596,FBpp0302752,FBpp0305729,FBpp0305866	AP-2alpha,AP-2mu,AP-2sigma,Amph,Atg6,Chc,Cirl,Exo84,Hsc70-4,Nsf2,Rab35,Rab5,Rep,Rop,Rph,Sec5,Sec6,Sec8,Slh,Syx18,Syx1A,Syx7,Vha68-2,alphaSnap,beta'COP,ldlCp,shark,shi
GO:0071705	nitrogen compound transport	29	523	6.24e-12	FBpp0071431,FBpp0071905,FBpp0072616,FBpp0073659,FBpp0073966,FBpp0074609,FBpp0076408,FBpp0077208,FBpp0077399,FBpp0078007,FBpp0078326,FBpp0079278,FBpp0080048,FBpp0080138,FBpp0082137,FBpp0082568,FBpp0083502,FBpp0083646,FBpp0083975,FBpp0084900,FBpp0085658,FBpp0085888,FBpp0086705,FBpp0087958,FBpp0088945,FBpp0292260,FBpp0293235,FBpp0294035,FBpp0301099	AP-2alpha,AP-2mu,AP-2sigma,Atg6,CG8728,Chc,Fs(2)Ket,Klp61F,Nup214,Nup358,Nup93-1,Rep,Rph,Sec23,Sec5,Sec6,Sec8,Smg5,Syx1A,Syx7,Tango7,Trn-SR,alphaSnap,beta'COP,emb,ldlCp,mbo,msk,ncd
GO:0022412	cellular process involved in reproduction in multicellular organism	36	849	8.16e-12	FBpp0070672,FBpp0071061,FBpp0072306,FBpp0072616,FBpp0073173,FBpp0073659,FBpp0073966,FBpp0074841,FBpp0077134,FBpp0077208,FBpp0077473,FBpp0078326,FBpp0079677,FBpp0082516,FBpp0082682,FBpp0082743,FBpp0083434,FBpp0083658,FBpp0083683,FBpp0084351,FBpp0084900,FBpp0085063,FBpp0085619,FBpp0085888,FBpp0086382,FBpp0086705,FBpp0086853,FBpp0087926,FBpp0088945,FBpp0089041,FBpp0111818,FBpp0294043,FBpp0302752,FBp…	AGO1,AP-2alpha,Akt1,CSN1b,CSN5,CSN6,Chc,Dp,Exo84,HP6,Hsc70-4,Klp61F,Nup93-1,PCNA,Prosalpha7,Rab5,Rop,Rpd3,Sec5,Sec6,Sec8,T-cp1,TER94,Tango7,alien,cher,chico,ctp,drosha,mys,ncd,shark,shi,slmb,zfh1,zip
GO:0051179	localization	57	2151	2.43e-11	FBpp0070402,FBpp0070672,FBpp0071061,FBpp0071431,FBpp0071905,FBpp0072306,FBpp0072616,FBpp0073659,FBpp0073966,FBpp0074609,FBpp0076408,FBpp0076487,FBpp0077208,FBpp0077399,FBpp0077473,FBpp0077941,FBpp0078007,FBpp0078326,FBpp0079278,FBpp0079999,FBpp0080048,FBpp0080138,FBpp0082137,FBpp0082139,FBpp0082346,FBpp0082516,FBpp0082568,FBpp0082682,FBpp0082743,FBpp0083434,FBpp0083502,FBpp0083646,FBpp0083975,FBp…	AP-2alpha,AP-2mu,AP-2sigma,Akt1,Amph,Atg6,CG8728,CSN5,Chc,Cirl,Cngl,Exo84,Fer1HCH,Fs(2)Ket,Hsc70-4,Klp61F,Nsf2,Nup214,Nup358,Nup93-1,Rab35,Rab5,Rep,Rop,Rph,SNF4Agamma,Sec23,Sec5,Sec6,Sec8,Slh,Smg5,Syx18,Syx1A,Syx7,Tango7,Trn-SR,Vha55,Vha68-2,alphaSnap,beta'COP,cher,crn,ctp,emb,kni,ldlCp,mbo,msk,mys,ncd,pbl,shark,shi,slmb,zfh1,zip
GO:0003006	developmental process involved in reproduction	34	816	6.94e-11	FBpp0070672,FBpp0071061,FBpp0072306,FBpp0073173,FBpp0073659,FBpp0073966,FBpp0074841,FBpp0074899,FBpp0077208,FBpp0077473,FBpp0078326,FBpp0079677,FBpp0082516,FBpp0082682,FBpp0082743,FBpp0083434,FBpp0083658,FBpp0083683,FBpp0084351,FBpp0085063,FBpp0085619,FBpp0085888,FBpp0086382,FBpp0086705,FBpp0086853,FBpp0087926,FBpp0088945,FBpp0089041,FBpp0111818,FBpp0294043,FBpp0302752,FBpp0303869,FBpp0304475,FBp…	AGO1,AP-2alpha,Akt1,CSN1b,CSN5,CSN6,Chc,Dp,Exo84,Hsc70-4,Nup93-1,PCNA,Prosalpha7,Rab5,Rop,Rpd3,Sec5,Sec6,Sec8,T-cp1,TER94,Tango7,alien,cher,chico,ctp,drosha,hid,mys,shark,shi,slmb,zfh1,zip
GO:0007269	neurotransmitter secretion	14	90	1.07e-10	FBpp0071431,FBpp0073966,FBpp0074609,FBpp0077208,FBpp0078007,FBpp0078326,FBpp0082346,FBpp0082516,FBpp0084351,FBpp0085658,FBpp0085888,FBpp0292260,FBpp0302596,FBpp0302752	Chc,Cirl,Exo84,Hsc70-4,Nsf2,Rep,Rop,Rph,Sec5,Sec6,Sec8,Syx1A,Syx7,alphaSnap
GO:0006886	intracellular protein transport	22	316	1.11e-10	FBpp0071431,FBpp0071905,FBpp0073659,FBpp0073966,FBpp0074609,FBpp0076408,FBpp0077399,FBpp0078007,FBpp0078326,FBpp0079278,FBpp0080048,FBpp0080138,FBpp0082137,FBpp0083502,FBpp0083646,FBpp0085658,FBpp0087958,FBpp0088945,FBpp0292260,FBpp0293235,FBpp0294035,FBpp0301099	AP-2alpha,AP-2mu,AP-2sigma,CG8728,Chc,Fs(2)Ket,Nup214,Nup358,Nup93-1,Rep,Rph,Sec23,Sec8,Smg5,Syx1A,Syx7,Trn-SR,alphaSnap,beta'COP,emb,mbo,msk
GO:0022414	reproductive process	41	1220	1.34e-10	FBpp0070672,FBpp0071061,FBpp0072306,FBpp0072438,FBpp0072616,FBpp0073173,FBpp0073659,FBpp0073966,FBpp0074841,FBpp0074899,FBpp0076487,FBpp0077134,FBpp0077208,FBpp0077473,FBpp0078326,FBpp0079677,FBpp0081484,FBpp0082516,FBpp0082682,FBpp0082743,FBpp0082817,FBpp0083434,FBpp0083658,FBpp0083683,FBpp0084351,FBpp0084900,FBpp0085063,FBpp0085619,FBpp0085888,FBpp0086382,FBpp0086705,FBpp0086853,FBpp0087926,FBp…	AGO1,AP-2alpha,Akt1,CG11985,CG16941,CSN1b,CSN5,CSN6,Chc,Dic61B,Dp,Exo84,HP6,Hsc70-4,Klp61F,Nup93-1,PCNA,Prosalpha7,Rab5,Rop,Rpd3,Sec5,Sec6,Sec8,T-cp1,TER94,Tango7,alien,cher,chico,ctp,drosha,hid,mys,ncd,pbl,shark,shi,slmb,zfh1,zip
GO:0006887	exocytosis	14	93	1.37e-10	FBpp0071431,FBpp0073966,FBpp0074609,FBpp0077208,FBpp0078007,FBpp0078326,FBpp0082346,FBpp0084351,FBpp0085888,FBpp0086941,FBpp0089084,FBpp0292260,FBpp0302752,FBpp0305729	Amph,Chc,Exo84,Nsf2,Rab35,Rop,Rph,Sec5,Sec6,Sec8,Slh,Syx1A,Syx7,alphaSnap
GO:0007292	female gamete generation	30	651	1.44e-10	FBpp0070672,FBpp0071061,FBpp0072306,FBpp0073173,FBpp0073659,FBpp0073966,FBpp0074841,FBpp0077134,FBpp0077208,FBpp0077473,FBpp0078326,FBpp0079677,FBpp0082516,FBpp0082682,FBpp0082743,FBpp0083434,FBpp0083683,FBpp0084900,FBpp0085619,FBpp0085888,FBpp0086382,FBpp0086853,FBpp0087926,FBpp0088945,FBpp0089041,FBpp0294043,FBpp0302752,FBpp0303869,FBpp0304475,FBpp0305866	AGO1,AP-2alpha,Akt1,CSN1b,CSN5,Chc,Dp,HP6,Hsc70-4,Nup93-1,PCNA,Prosalpha7,Rab5,Rop,Rpd3,Sec5,Sec6,Sec8,T-cp1,alien,cher,chico,ctp,drosha,mys,ncd,shark,shi,slmb,zip
GO:0007281	germ cell development	31	714	2.46e-10	FBpp0070672,FBpp0071061,FBpp0072306,FBpp0073173,FBpp0073659,FBpp0073966,FBpp0074841,FBpp0077208,FBpp0077473,FBpp0078326,FBpp0079677,FBpp0082516,FBpp0082682,FBpp0082743,FBpp0083434,FBpp0083658,FBpp0083683,FBpp0084351,FBpp0085619,FBpp0085888,FBpp0086382,FBpp0086705,FBpp0086853,FBpp0087926,FBpp0088945,FBpp0089041,FBpp0294043,FBpp0302752,FBpp0303869,FBpp0304475,FBpp0305866	AGO1,AP-2alpha,Akt1,CSN1b,CSN5,CSN6,Chc,Dp,Exo84,Hsc70-4,Nup93-1,PCNA,Prosalpha7,Rab5,Rop,Rpd3,Sec5,Sec6,Sec8,T-cp1,Tango7,alien,cher,chico,ctp,drosha,mys,shark,shi,slmb,zip
GO:0048489	synaptic vesicle transport	13	80	3.08e-10	FBpp0071431,FBpp0073966,FBpp0074609,FBpp0077208,FBpp0078007,FBpp0078326,FBpp0082346,FBpp0084351,FBpp0085888,FBpp0088945,FBpp0292260,FBpp0302752,FBpp0305866	AP-2alpha,Chc,Exo84,Nsf2,Rop,Rph,Sec5,Sec6,Sec8,Syx1A,Syx7,alphaSnap,shi
GO:0050789	regulation of biological process	77	3908	3.35e-10	FBpp0070402,FBpp0070672,FBpp0071061,FBpp0071431,FBpp0071848,FBpp0071905,FBpp0072306,FBpp0072616,FBpp0073173,FBpp0073572,FBpp0073966,FBpp0074756,FBpp0074899,FBpp0076408,FBpp0076487,FBpp0076806,FBpp0077134,FBpp0077208,FBpp0077399,FBpp0077473,FBpp0077941,FBpp0078007,FBpp0078013,FBpp0078318,FBpp0078326,FBpp0079278,FBpp0079648,FBpp0079677,FBpp0079680,FBpp0080048,FBpp0080138,FBpp0080622,FBpp0080685,FBp…	AGO1,AP-2alpha,Akt1,Amph,Bap60,Bub3,CG10333,CG11985,CG2051,CG32547,CG6094,CSN5,Cdk12,Cdk9,Chc,Cirl,Cngl,Cul1,CycK,Dop1R1,Dp,HP6,Hsc70-4,Klp61F,Nsf2,Nup214,Nup358,PCNA,Prp19,Rab35,Rab5,Rep,RnrL,Rop,Rpd3,Rph,SMC2,SNF4Agamma,Sec23,Sec5,Sec8,Side,Slh,Smg5,Snmp1,Syx1A,Syx7,TER94,Tango7,Trn-SR,Tsp47F,alien,beta'COP,cher,chico,crn,ctp,drosha,eIF-1A,eRF1,emb,hid,kni,mbo,mgl,msk,mys,ncd,pbl,rept,scny,shar…
GO:0048477	oogenesis	28	597	4.48e-10	FBpp0070672,FBpp0071061,FBpp0072306,FBpp0073173,FBpp0073659,FBpp0073966,FBpp0074841,FBpp0077208,FBpp0077473,FBpp0078326,FBpp0079677,FBpp0082516,FBpp0082682,FBpp0082743,FBpp0083434,FBpp0083683,FBpp0085619,FBpp0085888,FBpp0086382,FBpp0086853,FBpp0087926,FBpp0088945,FBpp0089041,FBpp0294043,FBpp0302752,FBpp0303869,FBpp0304475,FBpp0305866	AGO1,AP-2alpha,Akt1,CSN1b,CSN5,Chc,Dp,Hsc70-4,Nup93-1,PCNA,Prosalpha7,Rab5,Rop,Rpd3,Sec5,Sec6,Sec8,T-cp1,alien,cher,chico,ctp,drosha,mys,shark,shi,slmb,zip
GO:0032504	multicellular organism reproduction	39	1173	5.2e-10	FBpp0070672,FBpp0071061,FBpp0072306,FBpp0072438,FBpp0072616,FBpp0073173,FBpp0073659,FBpp0073966,FBpp0074841,FBpp0077134,FBpp0077208,FBpp0077473,FBpp0078326,FBpp0079677,FBpp0081484,FBpp0082516,FBpp0082682,FBpp0082743,FBpp0082817,FBpp0083434,FBpp0083658,FBpp0083683,FBpp0084351,FBpp0084900,FBpp0085063,FBpp0085619,FBpp0085888,FBpp0086382,FBpp0086705,FBpp0086853,FBpp0087926,FBpp0088945,FBpp0089041,FBp…	AGO1,AP-2alpha,Akt1,CG11985,CG16941,CSN1b,CSN5,CSN6,Chc,Dic61B,Dp,Exo84,HP6,Hsc70-4,Klp61F,Nup93-1,PCNA,Prosalpha7,Rab5,Rop,Rpd3,Sec5,Sec6,Sec8,T-cp1,TER94,Tango7,alien,cher,chico,ctp,drosha,mys,ncd,shark,shi,slmb,zfh1,zip
GO:0048468	cell development	41	1300	6.44e-10	FBpp0070402,FBpp0070672,FBpp0071061,FBpp0072306,FBpp0073173,FBpp0073659,FBpp0073966,FBpp0074298,FBpp0074756,FBpp0074841,FBpp0074899,FBpp0076408,FBpp0076487,FBpp0077208,FBpp0077473,FBpp0078326,FBpp0079677,FBpp0082516,FBpp0082682,FBpp0082743,FBpp0083434,FBpp0083658,FBpp0083683,FBpp0083975,FBpp0084351,FBpp0085063,FBpp0085619,FBpp0085888,FBpp0086382,FBpp0086705,FBpp0086853,FBpp0086941,FBpp0087926,FBp…	AGO1,AP-2alpha,Akt1,Amph,Atg6,CSN1b,CSN5,CSN6,Chc,Dp,Exo84,Hsc70-4,Nup93-1,PCNA,Prosalpha7,Rab5,Rop,Rpd3,Sec5,Sec6,Sec8,T-cp1,TER94,Tango7,alien,cher,chico,crn,ctp,drosha,hid,msk,mys,pbl,rept,shark,shi,slmb,wupA,zfh1,zip
GO:0009888	tissue development	36	1029	9.23e-10	FBpp0070402,FBpp0070672,FBpp0071061,FBpp0072306,FBpp0074298,FBpp0074609,FBpp0074756,FBpp0074841,FBpp0074899,FBpp0076408,FBpp0076487,FBpp0077208,FBpp0077473,FBpp0078326,FBpp0079648,FBpp0079999,FBpp0082137,FBpp0082516,FBpp0082743,FBpp0083434,FBpp0083658,FBpp0083683,FBpp0085063,FBpp0085619,FBpp0085888,FBpp0086382,FBpp0086853,FBpp0088945,FBpp0089041,FBpp0089084,FBpp0111762,FBpp0292260,FBpp0302752,FBp…	AP-2alpha,CSN1b,CSN5,CSN6,Dp,Hsc70-4,PCNA,Prosalpha7,Rab5,RnrL,Rop,Sec5,Sec6,Sec8,Slh,Syx1A,T-cp1,Vha68-2,alien,alphaSnap,cher,crn,ctp,hid,mbo,msk,mys,pbl,rept,shark,shi,slmb,sno,wupA,zfh1,zip
GO:0006810	transport	47	1699	9.78e-10	FBpp0070672,FBpp0071431,FBpp0071905,FBpp0072616,FBpp0073659,FBpp0073966,FBpp0074609,FBpp0076408,FBpp0077208,FBpp0077399,FBpp0077473,FBpp0078007,FBpp0078326,FBpp0079278,FBpp0079999,FBpp0080048,FBpp0080138,FBpp0082137,FBpp0082139,FBpp0082346,FBpp0082516,FBpp0082568,FBpp0083502,FBpp0083646,FBpp0083975,FBpp0084050,FBpp0084351,FBpp0084900,FBpp0085658,FBpp0085888,FBpp0086382,FBpp0086705,FBpp0086941,FBp…	AP-2alpha,AP-2mu,AP-2sigma,Amph,Atg6,CG8728,Chc,Cirl,Cngl,Exo84,Fer1HCH,Fs(2)Ket,Hsc70-4,Klp61F,Nsf2,Nup214,Nup358,Nup93-1,Rab35,Rab5,Rep,Rop,Rph,Sec23,Sec5,Sec6,Sec8,Slh,Smg5,Syx18,Syx1A,Syx7,Tango7,Trn-SR,Vha55,Vha68-2,alphaSnap,beta'COP,cher,ctp,emb,ldlCp,mbo,msk,ncd,shark,shi
GO:0099003	vesicle-mediated transport in synapse	14	115	1.11e-09	FBpp0071431,FBpp0073966,FBpp0074609,FBpp0077208,FBpp0077473,FBpp0078007,FBpp0078326,FBpp0082346,FBpp0084351,FBpp0085888,FBpp0088945,FBpp0292260,FBpp0302752,FBpp0305866	AP-2alpha,Chc,Exo84,Nsf2,Rab5,Rop,Rph,Sec5,Sec6,Sec8,Syx1A,Syx7,alphaSnap,shi
GO:0048856	anatomical structure development	60	2628	1.12e-09	FBpp0070402,FBpp0070672,FBpp0071061,FBpp0072306,FBpp0072616,FBpp0073173,FBpp0073572,FBpp0073659,FBpp0073893,FBpp0073966,FBpp0074298,FBpp0074609,FBpp0074756,FBpp0074841,FBpp0074899,FBpp0076408,FBpp0076487,FBpp0077208,FBpp0077473,FBpp0077941,FBpp0078007,FBpp0078326,FBpp0079278,FBpp0079648,FBpp0079677,FBpp0079999,FBpp0082137,FBpp0082346,FBpp0082516,FBpp0082682,FBpp0082743,FBpp0083434,FBpp0083658,FBp…	AGO1,AP-2alpha,Akt1,Amph,Atg6,Bap60,CSN1b,CSN5,CSN6,Chc,Cul1,Dp,Exo84,Fer1HCH,Hsc70-4,Klp61F,Nsf2,Nup93-1,PCNA,Prosalpha7,Rab5,RnrL,Rop,Rpd3,Sec23,Sec5,Sec6,Sec8,Slh,Snmp1,Syx1A,Syx7,T-cp1,TER94,Tango7,Vha68-2,alien,alphaSnap,cher,chico,crn,ctp,drosha,emb,hid,kni,mbo,mgl,msk,mys,pbl,rept,shark,shi,shtd,slmb,sno,wupA,zfh1,zip
GO:0099504	synaptic vesicle cycle	14	116	1.18e-09	FBpp0071431,FBpp0073966,FBpp0074609,FBpp0077208,FBpp0077473,FBpp0078007,FBpp0078326,FBpp0082346,FBpp0084351,FBpp0085888,FBpp0088945,FBpp0292260,FBpp0302752,FBpp0305866	AP-2alpha,Chc,Exo84,Nsf2,Rab5,Rop,Rph,Sec5,Sec6,Sec8,Syx1A,Syx7,alphaSnap,shi
GO:0051640	organelle localization	18	231	1.34e-09	FBpp0070672,FBpp0071431,FBpp0073659,FBpp0073966,FBpp0074609,FBpp0077208,FBpp0078007,FBpp0078326,FBpp0079278,FBpp0082137,FBpp0082346,FBpp0084351,FBpp0085888,FBpp0088945,FBpp0089084,FBpp0292260,FBpp0302752,FBpp0305866	AP-2alpha,Chc,Exo84,Nsf2,Nup93-1,Rop,Rph,Sec5,Sec6,Sec8,Slh,Syx1A,Syx7,alphaSnap,ctp,emb,mbo,shi
GO:0032502	developmental process	61	2729	1.56e-09	FBpp0070402,FBpp0070672,FBpp0071061,FBpp0072306,FBpp0072616,FBpp0073173,FBpp0073572,FBpp0073659,FBpp0073893,FBpp0073966,FBpp0074298,FBpp0074609,FBpp0074756,FBpp0074841,FBpp0074899,FBpp0076408,FBpp0076487,FBpp0076806,FBpp0077208,FBpp0077473,FBpp0077941,FBpp0078007,FBpp0078326,FBpp0079278,FBpp0079648,FBpp0079677,FBpp0079999,FBpp0082137,FBpp0082346,FBpp0082516,FBpp0082682,FBpp0082743,FBpp0083434,FBp…	AGO1,AP-2alpha,Akt1,Amph,Atg6,Bap60,CSN1b,CSN5,CSN6,Chc,Cul1,Dp,Exo84,Fer1HCH,Hsc70-4,Klp61F,Nsf2,Nup93-1,PCNA,Prosalpha7,Rab5,RnrL,Rop,Rpd3,Sec23,Sec5,Sec6,Sec8,Slh,Snmp1,Syx1A,Syx7,T-cp1,TER94,Tango7,Vha68-2,alien,alphaSnap,cher,chico,crn,ctp,drosha,emb,hid,kni,mbo,mgl,msk,mys,pbl,rept,scny,shark,shi,shtd,slmb,sno,wupA,zfh1,zip
GO:0048646	anatomical structure formation involved in morphogenesis	25	506	1.81e-09	FBpp0070672,FBpp0071061,FBpp0072306,FBpp0073966,FBpp0074298,FBpp0074841,FBpp0076487,FBpp0077208,FBpp0077473,FBpp0079999,FBpp0082682,FBpp0082743,FBpp0083434,FBpp0085619,FBpp0086382,FBpp0086705,FBpp0086853,FBpp0087926,FBpp0111818,FBpp0292260,FBpp0294043,FBpp0301099,FBpp0303869,FBpp0304475,FBpp0305866	AGO1,Akt1,CSN1b,CSN5,Chc,Dp,PCNA,Rab5,Sec23,Sec5,Syx1A,TER94,Tango7,Vha68-2,alien,cher,ctp,drosha,mys,pbl,shark,shi,slmb,wupA,zip
GO:0071702	organic substance transport	29	699	2.24e-09	FBpp0071431,FBpp0071905,FBpp0072616,FBpp0073659,FBpp0073966,FBpp0074609,FBpp0076408,FBpp0077208,FBpp0077399,FBpp0078007,FBpp0078326,FBpp0079278,FBpp0080048,FBpp0080138,FBpp0082137,FBpp0082568,FBpp0083502,FBpp0083646,FBpp0083975,FBpp0084900,FBpp0085658,FBpp0085888,FBpp0086705,FBpp0087958,FBpp0088945,FBpp0292260,FBpp0293235,FBpp0294035,FBpp0301099	AP-2alpha,AP-2mu,AP-2sigma,Atg6,CG8728,Chc,Fs(2)Ket,Klp61F,Nup214,Nup358,Nup93-1,Rep,Rph,Sec23,Sec5,Sec6,Sec8,Smg5,Syx1A,Syx7,Tango7,Trn-SR,alphaSnap,beta'COP,emb,ldlCp,mbo,msk,ncd
GO:0048869	cellular developmental process	46	1686	2.29e-09	FBpp0070402,FBpp0070672,FBpp0071061,FBpp0072306,FBpp0073173,FBpp0073572,FBpp0073659,FBpp0073966,FBpp0074298,FBpp0074756,FBpp0074841,FBpp0074899,FBpp0076408,FBpp0076487,FBpp0077208,FBpp0077473,FBpp0077941,FBpp0078326,FBpp0079677,FBpp0082516,FBpp0082682,FBpp0082743,FBpp0083434,FBpp0083658,FBpp0083683,FBpp0083975,FBpp0084351,FBpp0085063,FBpp0085619,FBpp0085888,FBpp0086382,FBpp0086705,FBpp0086853,FBp…	AGO1,AP-2alpha,Akt1,Amph,Atg6,Bap60,CSN1b,CSN5,CSN6,Chc,Cul1,Dp,Exo84,Hsc70-4,Nup93-1,PCNA,Prosalpha7,Rab5,Rop,Rpd3,Sec23,Sec5,Sec6,Sec8,Slh,T-cp1,TER94,Tango7,alien,cher,chico,crn,ctp,drosha,hid,kni,msk,mys,pbl,rept,shark,shi,slmb,wupA,zfh1,zip
GO:0044085	cellular component biogenesis	38	1201	3.1e-09	FBpp0070402,FBpp0070672,FBpp0071061,FBpp0071562,FBpp0072306,FBpp0072616,FBpp0072908,FBpp0073659,FBpp0073966,FBpp0074298,FBpp0074609,FBpp0074756,FBpp0074822,FBpp0076487,FBpp0077208,FBpp0078318,FBpp0079278,FBpp0079874,FBpp0082137,FBpp0082346,FBpp0082817,FBpp0083434,FBpp0083975,FBpp0084144,FBpp0084351,FBpp0084900,FBpp0085619,FBpp0085888,FBpp0085902,FBpp0086382,FBpp0086603,FBpp0086853,FBpp0086941,FBp…	AGO1,Amph,Atg3,Atg6,CG11920,CG12264,CG16941,CG17737,CG2051,CG4038,Chc,Dp,Exo84,Klp61F,Nsf2,Nup93-1,PCNA,Prp19,Rab35,Rop,Rpn6,Sec5,Sec6,alphaSnap,cher,crn,ctp,emb,mbo,mys,ncd,pbl,rept,shark,shi,slmb,wupA,zip
GO:0030154	cell differentiation	45	1644	3.53e-09	FBpp0070402,FBpp0070672,FBpp0071061,FBpp0072306,FBpp0073173,FBpp0073572,FBpp0073659,FBpp0073966,FBpp0074298,FBpp0074756,FBpp0074841,FBpp0074899,FBpp0076408,FBpp0076487,FBpp0077208,FBpp0077473,FBpp0077941,FBpp0078326,FBpp0079677,FBpp0082516,FBpp0082682,FBpp0082743,FBpp0083434,FBpp0083658,FBpp0083683,FBpp0083975,FBpp0084351,FBpp0085063,FBpp0085619,FBpp0085888,FBpp0086382,FBpp0086705,FBpp0086853,FBp…	AGO1,AP-2alpha,Akt1,Amph,Atg6,Bap60,CSN1b,CSN5,CSN6,Chc,Cul1,Dp,Exo84,Hsc70-4,Nup93-1,PCNA,Prosalpha7,Rab5,Rop,Rpd3,Sec23,Sec5,Sec6,Sec8,T-cp1,TER94,Tango7,alien,cher,chico,crn,ctp,drosha,hid,kni,msk,mys,pbl,rept,shark,shi,slmb,wupA,zfh1,zip
GO:0016079	synaptic vesicle exocytosis	11	62	3.61e-09	FBpp0071431,FBpp0073966,FBpp0074609,FBpp0077208,FBpp0078007,FBpp0078326,FBpp0082346,FBpp0084351,FBpp0085888,FBpp0292260,FBpp0302752	Chc,Exo84,Nsf2,Rop,Rph,Sec5,Sec6,Sec8,Syx1A,Syx7,alphaSnap
GO:0032501	multicellular organismal process	69	3441	3.78e-09	FBpp0070402,FBpp0070672,FBpp0071061,FBpp0072306,FBpp0072438,FBpp0072616,FBpp0073173,FBpp0073572,FBpp0073659,FBpp0073893,FBpp0073966,FBpp0074298,FBpp0074609,FBpp0074756,FBpp0074841,FBpp0074899,FBpp0076408,FBpp0076487,FBpp0076806,FBpp0077134,FBpp0077208,FBpp0077473,FBpp0077941,FBpp0078007,FBpp0078326,FBpp0079278,FBpp0079677,FBpp0079999,FBpp0081484,FBpp0082137,FBpp0082346,FBpp0082516,FBpp0082682,FBp…	AGO1,AP-2alpha,Akt1,Amph,Atg6,Bap60,CG11985,CG16941,CSN1b,CSN5,CSN6,Chc,Cirl,Cul1,Dic61B,Dop1R1,Dp,Exo84,Fer1HCH,HP6,Hsc70-4,Klp61F,Nsf2,Nup93-1,PCNA,Prosalpha7,Rab5,Rop,Rpd3,Sec23,Sec5,Sec6,Sec8,Slh,Snmp1,Syx1A,Syx7,T-cp1,TER94,Tango7,Vha68-2,alien,alphaSnap,cher,chico,crn,ctp,dpr2,drosha,emb,fabp,hid,kni,mbo,mgl,msk,mys,ncd,pbl,rept,scny,shark,shi,shtd,slmb,sno,wupA,zfh1,zip
GO:0051656	establishment of organelle localization	16	187	4.05e-09	FBpp0070672,FBpp0071431,FBpp0073966,FBpp0074609,FBpp0077208,FBpp0078007,FBpp0078326,FBpp0079278,FBpp0082137,FBpp0082346,FBpp0084351,FBpp0085888,FBpp0088945,FBpp0292260,FBpp0302752,FBpp0305866	AP-2alpha,Chc,Exo84,Nsf2,Rop,Rph,Sec5,Sec6,Sec8,Syx1A,Syx7,alphaSnap,ctp,emb,mbo,shi
GO:0060429	epithelium development	33	949	6.33e-09	FBpp0070402,FBpp0070672,FBpp0071061,FBpp0072306,FBpp0074609,FBpp0074756,FBpp0074841,FBpp0074899,FBpp0076408,FBpp0076487,FBpp0077208,FBpp0077473,FBpp0078326,FBpp0079999,FBpp0082137,FBpp0082516,FBpp0082743,FBpp0083434,FBpp0083658,FBpp0083683,FBpp0085619,FBpp0085888,FBpp0086382,FBpp0086853,FBpp0088945,FBpp0089041,FBpp0089084,FBpp0111762,FBpp0292260,FBpp0302752,FBpp0303869,FBpp0304475,FBpp0305866	AP-2alpha,CSN1b,CSN5,CSN6,Dp,Hsc70-4,PCNA,Prosalpha7,Rab5,Rop,Sec5,Sec6,Sec8,Slh,Syx1A,T-cp1,Vha68-2,alien,alphaSnap,cher,crn,ctp,hid,mbo,msk,mys,pbl,rept,shark,shi,slmb,sno,zip
GO:0051704	multi-organism process	40	1361	6.44e-09	FBpp0070672,FBpp0071061,FBpp0072306,FBpp0072438,FBpp0073173,FBpp0073659,FBpp0073966,FBpp0074841,FBpp0077134,FBpp0077208,FBpp0077473,FBpp0078326,FBpp0079677,FBpp0081484,FBpp0082137,FBpp0082516,FBpp0082682,FBpp0082743,FBpp0082817,FBpp0083434,FBpp0083658,FBpp0083683,FBpp0084351,FBpp0084900,FBpp0085063,FBpp0085619,FBpp0085888,FBpp0086382,FBpp0086705,FBpp0086853,FBpp0087926,FBpp0088945,FBpp0089041,FBp…	AGO1,AP-2alpha,Akt1,CG11985,CG16941,CSN1b,CSN5,CSN6,Chc,Dic61B,Dp,Exo84,Fer1HCH,HP6,Hsc70-4,Nup93-1,PCNA,Prosalpha7,Rab5,Rop,Rpd3,Sec5,Sec6,Sec8,T-cp1,TER94,Tango7,alien,cher,chico,ctp,drosha,mbo,mys,ncd,shark,shi,slmb,zfh1,zip
GO:0140029	exocytic process	10	49	6.82e-09	FBpp0074609,FBpp0077208,FBpp0078007,FBpp0078326,FBpp0082346,FBpp0084351,FBpp0085888,FBpp0089084,FBpp0292260,FBpp0302752	Exo84,Nsf2,Rop,Sec5,Sec6,Sec8,Slh,Syx1A,Syx7,alphaSnap
GO:0050794	regulation of cellular process	70	3635	1.42e-08	FBpp0070402,FBpp0070672,FBpp0071061,FBpp0071431,FBpp0071848,FBpp0072306,FBpp0072616,FBpp0073173,FBpp0073572,FBpp0073966,FBpp0074756,FBpp0074899,FBpp0076408,FBpp0076487,FBpp0076806,FBpp0077134,FBpp0077208,FBpp0077399,FBpp0077473,FBpp0077941,FBpp0078007,FBpp0078013,FBpp0078318,FBpp0078326,FBpp0079278,FBpp0079648,FBpp0079677,FBpp0079680,FBpp0080138,FBpp0080685,FBpp0082346,FBpp0082516,FBpp0082682,FBp…	AGO1,AP-2alpha,Akt1,Bap60,Bub3,CG2051,CG32547,CG6094,CSN5,Cdk12,Cdk9,Chc,Cirl,Cngl,Cul1,CycK,Dop1R1,Dp,HP6,Hsc70-4,Klp61F,Nsf2,Nup358,PCNA,Prp19,Rab35,Rab5,Rep,RnrL,Rop,Rpd3,Rph,SMC2,SNF4Agamma,Sec23,Sec5,Sec8,Side,Slh,Smg5,Snmp1,Syx1A,Syx7,TER94,Tango7,Trn-SR,Tsp47F,alien,cher,chico,crn,ctp,eIF-1A,eRF1,emb,hid,kni,mgl,msk,mys,ncd,pbl,rept,scny,shark,shi,slmb,sno,zfh1,zip
GO:0009653	anatomical structure morphogenesis	41	1465	1.43e-08	FBpp0070402,FBpp0070672,FBpp0071061,FBpp0072306,FBpp0073173,FBpp0073966,FBpp0074298,FBpp0074609,FBpp0074756,FBpp0074841,FBpp0074899,FBpp0076408,FBpp0076487,FBpp0077208,FBpp0077473,FBpp0079999,FBpp0082137,FBpp0082346,FBpp0082516,FBpp0082682,FBpp0082743,FBpp0083434,FBpp0083658,FBpp0083975,FBpp0085063,FBpp0085619,FBpp0085888,FBpp0086382,FBpp0086705,FBpp0086853,FBpp0086941,FBpp0087926,FBpp0089084,FBp…	AGO1,Akt1,Amph,Atg6,CSN1b,CSN5,CSN6,Chc,Dp,Hsc70-4,Nsf2,PCNA,Rab5,Rpd3,Sec23,Sec5,Sec6,Slh,Syx1A,TER94,Tango7,Vha68-2,alien,alphaSnap,cher,crn,ctp,drosha,hid,mbo,msk,mys,pbl,rept,shark,shi,slmb,sno,wupA,zfh1,zip
GO:0010467	gene expression	36	1160	1.52e-08	FBpp0070402,FBpp0070430,FBpp0070457,FBpp0071562,FBpp0071848,FBpp0072908,FBpp0073659,FBpp0073828,FBpp0076287,FBpp0077251,FBpp0078013,FBpp0079680,FBpp0079874,FBpp0080121,FBpp0080138,FBpp0080622,FBpp0081156,FBpp0081484,FBpp0082137,FBpp0082516,FBpp0082817,FBpp0082994,FBpp0084021,FBpp0084144,FBpp0084726,FBpp0085902,FBpp0086705,FBpp0087926,FBpp0087958,FBpp0089217,FBpp0294043,FBpp0301570,FBpp0304202,FBp…	AGO1,CG10333,CG11920,CG11985,CG12264,CG16941,CG17737,CG33123,CG3806,CG4038,CG5660,CG5706,CG6094,CG6227,CG8636,CG8728,Cdc27,Cdk12,Cdk9,Cpsf100,EF2,Elf,Hsc70-4,Nup93-1,Prp19,Ref1,RpII33,Smg5,Tango7,crn,drosha,eIF-1A,eIF2B-beta,eIF5B,eRF1,mbo
GO:0007268	chemical synaptic transmission	16	214	2.22e-08	FBpp0071431,FBpp0073966,FBpp0074609,FBpp0077208,FBpp0078007,FBpp0078326,FBpp0082346,FBpp0082516,FBpp0084050,FBpp0084351,FBpp0085658,FBpp0085888,FBpp0292260,FBpp0302596,FBpp0302752,FBpp0305866	Chc,Cirl,Exo84,Hsc70-4,Nsf2,Rep,Rop,Rph,Sec5,Sec6,Sec8,Syx18,Syx1A,Syx7,alphaSnap,shi
GO:0032879	regulation of localization	20	404	1.31e-07	FBpp0071061,FBpp0071431,FBpp0071905,FBpp0072616,FBpp0073966,FBpp0077208,FBpp0077473,FBpp0078007,FBpp0079278,FBpp0080048,FBpp0082137,FBpp0082682,FBpp0088945,FBpp0089084,FBpp0111818,FBpp0291363,FBpp0292260,FBpp0293235,FBpp0301099,FBpp0302752	AP-2alpha,Akt1,Chc,Klp61F,Nup214,Nup358,Rab5,Rop,Rph,Sec23,Sec5,Slh,Syx1A,Syx7,TER94,beta'COP,emb,mbo,mgl,mys
GO:0006904	vesicle docking involved in exocytosis	8	34	1.54e-07	FBpp0077208,FBpp0078007,FBpp0078326,FBpp0084351,FBpp0085888,FBpp0089084,FBpp0292260,FBpp0302752	Exo84,Rop,Sec5,Sec6,Sec8,Slh,Syx1A,Syx7
GO:0051049	regulation of transport	16	249	1.59e-07	FBpp0071431,FBpp0071905,FBpp0072616,FBpp0073966,FBpp0077208,FBpp0077473,FBpp0078007,FBpp0079278,FBpp0082137,FBpp0082682,FBpp0088945,FBpp0089084,FBpp0291363,FBpp0292260,FBpp0293235,FBpp0301099	AP-2alpha,Akt1,Chc,Klp61F,Nup214,Nup358,Rab5,Rph,Sec23,Sec5,Slh,Syx1A,Syx7,emb,mbo,mgl
GO:0051301	cell division	16	249	1.59e-07	FBpp0072306,FBpp0074609,FBpp0074841,FBpp0076487,FBpp0077208,FBpp0078326,FBpp0079677,FBpp0082743,FBpp0084351,FBpp0085063,FBpp0088945,FBpp0292260,FBpp0302752,FBpp0303869,FBpp0305729,FBpp0305866	AP-2alpha,CSN1b,CSN5,Exo84,Rab35,Rop,Sec5,Sec8,Syx1A,alien,alphaSnap,chico,pbl,shi,zfh1,zip
GO:0022607	cellular component assembly	32	1035	1.72e-07	FBpp0070402,FBpp0070672,FBpp0071061,FBpp0072306,FBpp0072616,FBpp0072908,FBpp0073659,FBpp0073966,FBpp0074298,FBpp0074609,FBpp0074756,FBpp0074822,FBpp0076487,FBpp0077208,FBpp0078318,FBpp0079278,FBpp0079874,FBpp0082346,FBpp0082817,FBpp0083434,FBpp0083975,FBpp0084351,FBpp0084900,FBpp0085619,FBpp0085902,FBpp0086382,FBpp0086603,FBpp0086853,FBpp0294043,FBpp0302752,FBpp0304475,FBpp0305866	AGO1,Atg3,Atg6,CG12264,CG16941,CG17737,CG2051,Chc,Dp,Exo84,Klp61F,Nsf2,Nup93-1,PCNA,Prp19,Rop,Rpn6,Sec5,alphaSnap,cher,crn,ctp,emb,mys,ncd,pbl,rept,shark,shi,slmb,wupA,zip
GO:0043170	macromolecule metabolic process	64	3350	1.88e-07	FBpp0070402,FBpp0070430,FBpp0070457,FBpp0071562,FBpp0071848,FBpp0072908,FBpp0073173,FBpp0073659,FBpp0073828,FBpp0073893,FBpp0074756,FBpp0074822,FBpp0074841,FBpp0076287,FBpp0076806,FBpp0077134,FBpp0077251,FBpp0077473,FBpp0078013,FBpp0078318,FBpp0078664,FBpp0079648,FBpp0079680,FBpp0079874,FBpp0080121,FBpp0080138,FBpp0080622,FBpp0081156,FBpp0081484,FBpp0082137,FBpp0082516,FBpp0082682,FBpp0082743,FBp…	AGO1,Akt1,Atg3,Atg6,CG10333,CG10663,CG11920,CG11985,CG12264,CG16941,CG17737,CG2051,CG33123,CG3806,CG4038,CG5660,CG5706,CG6094,CG6227,CG8636,CG8728,CSN1b,CSN5,CSN6,Cdc27,Cdk12,Cdk9,Cpsf100,Cul1,Dp,EF2,Elf,FANCI,HP6,Hsc70-4,Nup358,Nup93-1,PCNA,Prosalpha7,Prp19,Rab5,Ref1,Rep,RnrL,RpII33,Rpd3,Rpn11,Rpn6,Smg5,TER94,Tango7,alien,crn,drosha,eIF-1A,eIF2B-beta,eIF5B,eRF1,mbo,rept,scny,shark,shtd,slmb
GO:0051128	regulation of cellular component organization	27	767	2.36e-07	FBpp0071061,FBpp0072306,FBpp0073173,FBpp0073572,FBpp0073966,FBpp0076487,FBpp0076806,FBpp0077208,FBpp0077473,FBpp0077941,FBpp0078007,FBpp0078326,FBpp0082346,FBpp0082682,FBpp0083434,FBpp0084831,FBpp0084900,FBpp0086382,FBpp0088945,FBpp0111818,FBpp0291363,FBpp0292260,FBpp0293235,FBpp0301099,FBpp0302752,FBpp0304475,FBpp0305866	AP-2alpha,Akt1,Bap60,Bub3,Chc,Nsf2,Nup358,Rab5,Rop,Rpd3,Sec23,Sec5,Sec8,Syx1A,Syx7,TER94,cher,kni,mgl,mys,ncd,pbl,scny,shark,shi,slmb,zip
GO:0007275	multicellular organism development	50	2277	2.89e-07	FBpp0070402,FBpp0070672,FBpp0071061,FBpp0072306,FBpp0072616,FBpp0073173,FBpp0073572,FBpp0073893,FBpp0073966,FBpp0074298,FBpp0074609,FBpp0074756,FBpp0074899,FBpp0076408,FBpp0076487,FBpp0077208,FBpp0077473,FBpp0077941,FBpp0078007,FBpp0079278,FBpp0079677,FBpp0079999,FBpp0082137,FBpp0082346,FBpp0082516,FBpp0082682,FBpp0082743,FBpp0083434,FBpp0083975,FBpp0085063,FBpp0085888,FBpp0086382,FBpp0086705,FBp…	AGO1,Akt1,Amph,Atg6,Bap60,CSN5,Chc,Cul1,Dp,Fer1HCH,Hsc70-4,Klp61F,Nsf2,Rab5,Rop,Rpd3,Sec23,Sec5,Sec6,Slh,Snmp1,Syx1A,Syx7,TER94,Tango7,Vha68-2,alien,alphaSnap,cher,chico,crn,ctp,drosha,emb,hid,kni,mbo,mgl,msk,mys,pbl,rept,shark,shi,shtd,slmb,sno,wupA,zfh1,zip
GO:0044260	cellular macromolecule metabolic process	50	2291	3.41e-07	FBpp0070430,FBpp0070457,FBpp0071848,FBpp0072908,FBpp0073173,FBpp0073893,FBpp0074756,FBpp0074822,FBpp0074841,FBpp0076287,FBpp0076806,FBpp0077134,FBpp0077251,FBpp0077473,FBpp0078013,FBpp0078318,FBpp0078664,FBpp0079648,FBpp0079680,FBpp0080121,FBpp0080138,FBpp0082682,FBpp0082743,FBpp0082994,FBpp0083434,FBpp0083658,FBpp0083975,FBpp0084021,FBpp0085619,FBpp0085658,FBpp0085902,FBpp0086382,FBpp0086603,FBp…	AGO1,Akt1,Atg3,Atg6,CG17737,CG2051,CG33123,CG3806,CG5660,CG5706,CG6094,CG8636,CG8728,CSN1b,CSN5,CSN6,Cdc27,Cdk12,Cdk9,Cul1,Dp,EF2,Elf,FANCI,HP6,Nup358,PCNA,Prosalpha7,Prp19,Rab5,Rep,RnrL,RpII33,Rpd3,Rpn11,Rpn6,Smg5,TER94,Tango7,alien,drosha,eIF-1A,eIF2B-beta,eIF5B,eRF1,rept,scny,shark,shtd,slmb
GO:0030707	ovarian follicle cell development	17	306	3.58e-07	FBpp0071061,FBpp0072306,FBpp0077208,FBpp0077473,FBpp0078326,FBpp0082516,FBpp0083434,FBpp0083683,FBpp0085619,FBpp0085888,FBpp0086382,FBpp0086853,FBpp0088945,FBpp0089041,FBpp0302752,FBpp0304475,FBpp0305866	AP-2alpha,Dp,Hsc70-4,PCNA,Prosalpha7,Rab5,Rop,Sec5,Sec6,Sec8,T-cp1,cher,mys,shark,shi,slmb,zip
GO:0006996	organelle organization	42	1727	3.97e-07	FBpp0070672,FBpp0071061,FBpp0072306,FBpp0072616,FBpp0073173,FBpp0073659,FBpp0073966,FBpp0074298,FBpp0074609,FBpp0074756,FBpp0074822,FBpp0076408,FBpp0076487,FBpp0076806,FBpp0077134,FBpp0077473,FBpp0078007,FBpp0078318,FBpp0078326,FBpp0079278,FBpp0079999,FBpp0080138,FBpp0082516,FBpp0082568,FBpp0082964,FBpp0083975,FBpp0084351,FBpp0084900,FBpp0085619,FBpp0085888,FBpp0085902,FBpp0086591,FBpp0086705,FBp…	AGO1,Amph,Atg3,Atg6,CG2051,CG7794,CG8728,Chc,Exo84,HP6,Hsc70-4,Klp61F,Nup358,Nup93-1,PCNA,Prp19,Rab5,Rpd3,SMC2,Sec23,Sec6,Sec8,Smg5,Syx1A,Syx7,TER94,Tango7,Vha68-2,alphaSnap,cher,ctp,emb,ldlCp,msk,mys,ncd,pbl,rept,scny,shi,wupA,zip
GO:0061640	cytoskeleton-dependent cytokinesis	11	106	3.97e-07	FBpp0072306,FBpp0074609,FBpp0076487,FBpp0077208,FBpp0078326,FBpp0084351,FBpp0088945,FBpp0292260,FBpp0302752,FBpp0305729,FBpp0305866	AP-2alpha,Exo84,Rab35,Rop,Sec5,Sec8,Syx1A,alphaSnap,pbl,shi,zip
GO:0000281	mitotic cytokinesis	9	65	8.37e-07	FBpp0072306,FBpp0074609,FBpp0076487,FBpp0077208,FBpp0088945,FBpp0292260,FBpp0302752,FBpp0305729,FBpp0305866	AP-2alpha,Rab35,Rop,Sec5,Syx1A,alphaSnap,pbl,shi,zip
GO:0051239	regulation of multicellular organismal process	25	713	8.59e-07	FBpp0070672,FBpp0071061,FBpp0073173,FBpp0073572,FBpp0074899,FBpp0076487,FBpp0076806,FBpp0078326,FBpp0079677,FBpp0082346,FBpp0082682,FBpp0082743,FBpp0083434,FBpp0086382,FBpp0086853,FBpp0086941,FBpp0087921,FBpp0111818,FBpp0291363,FBpp0292260,FBpp0294043,FBpp0300511,FBpp0301099,FBpp0302752,FBpp0304475	AGO1,Akt1,Amph,Bap60,CSN5,Cul1,Dop1R1,Dp,Nsf2,Rop,Rpd3,Sec23,Sec8,Syx1A,TER94,cher,chico,ctp,hid,mgl,mys,pbl,scny,shark,slmb
GO:0048731	system development	40	1657	1.14e-06	FBpp0070402,FBpp0070672,FBpp0071061,FBpp0072306,FBpp0073173,FBpp0073572,FBpp0073893,FBpp0073966,FBpp0074298,FBpp0074609,FBpp0074756,FBpp0074899,FBpp0076408,FBpp0076487,FBpp0077208,FBpp0077473,FBpp0077941,FBpp0079677,FBpp0079999,FBpp0082137,FBpp0082346,FBpp0082516,FBpp0082682,FBpp0082743,FBpp0083434,FBpp0083975,FBpp0085063,FBpp0085888,FBpp0086941,FBpp0087921,FBpp0087926,FBpp0089084,FBpp0111762,FBp…	AGO1,Akt1,Amph,Atg6,Bap60,CSN5,Chc,Cul1,Hsc70-4,Nsf2,Rab5,Rop,Rpd3,Sec23,Sec5,Sec6,Slh,Syx1A,TER94,Vha68-2,alphaSnap,cher,chico,crn,ctp,drosha,hid,kni,mbo,msk,mys,pbl,rept,shi,shtd,slmb,sno,wupA,zfh1,zip
GO:0060627	regulation of vesicle-mediated transport	11	121	1.31e-06	FBpp0071431,FBpp0072616,FBpp0073966,FBpp0077208,FBpp0077473,FBpp0078007,FBpp0088945,FBpp0089084,FBpp0291363,FBpp0292260,FBpp0301099	AP-2alpha,Chc,Klp61F,Rab5,Rph,Sec23,Sec5,Slh,Syx1A,Syx7,mgl
GO:0002009	morphogenesis of an epithelium	22	582	1.72e-06	FBpp0070402,FBpp0070672,FBpp0071061,FBpp0072306,FBpp0074609,FBpp0074756,FBpp0074841,FBpp0074899,FBpp0076408,FBpp0076487,FBpp0077208,FBpp0077473,FBpp0082137,FBpp0082743,FBpp0083434,FBpp0083658,FBpp0086382,FBpp0086853,FBpp0111762,FBpp0303869,FBpp0304475,FBpp0305866	CSN1b,CSN5,CSN6,Dp,Rab5,Sec5,alien,alphaSnap,cher,crn,ctp,hid,mbo,msk,mys,pbl,rept,shark,shi,slmb,sno,zip
GO:0043933	protein-containing complex subunit organization	22	584	1.8e-06	FBpp0070402,FBpp0072306,FBpp0072616,FBpp0072908,FBpp0073659,FBpp0073966,FBpp0074609,FBpp0074756,FBpp0077208,FBpp0078318,FBpp0079680,FBpp0082346,FBpp0082817,FBpp0084351,FBpp0085902,FBpp0086603,FBpp0111818,FBpp0294043,FBpp0302752,FBpp0304202,FBpp0305302,FBpp0305866	AGO1,CG16941,CG17737,CG2051,CG6094,Chc,Elf,Exo84,Klp61F,Nsf2,Nup93-1,Prp19,Rop,Rpn6,Sec5,TER94,alphaSnap,crn,eRF1,rept,shi,zip
GO:0022402	cell cycle process	20	493	2.32e-06	FBpp0070672,FBpp0072306,FBpp0072616,FBpp0073659,FBpp0074609,FBpp0076487,FBpp0077134,FBpp0077208,FBpp0078326,FBpp0079278,FBpp0084351,FBpp0084831,FBpp0084900,FBpp0085619,FBpp0088945,FBpp0292260,FBpp0293235,FBpp0302752,FBpp0305729,FBpp0305866	AP-2alpha,Bub3,Exo84,HP6,Klp61F,Nup358,Nup93-1,PCNA,Rab35,Rop,Sec5,Sec8,Syx1A,alphaSnap,ctp,emb,ncd,pbl,shi,zip
GO:1903047	mitotic cell cycle process	15	270	2.32e-06	FBpp0070672,FBpp0072306,FBpp0072616,FBpp0074609,FBpp0076487,FBpp0077208,FBpp0084831,FBpp0084900,FBpp0085619,FBpp0088945,FBpp0292260,FBpp0293235,FBpp0302752,FBpp0305729,FBpp0305866	AP-2alpha,Bub3,Klp61F,Nup358,PCNA,Rab35,Rop,Sec5,Syx1A,alphaSnap,ctp,ncd,pbl,shi,zip
GO:0007154	cell communication	37	1505	2.49e-06	FBpp0071061,FBpp0071431,FBpp0073966,FBpp0074609,FBpp0074822,FBpp0074899,FBpp0076408,FBpp0077208,FBpp0077473,FBpp0078007,FBpp0078326,FBpp0079677,FBpp0082346,FBpp0082516,FBpp0082682,FBpp0082994,FBpp0083975,FBpp0084050,FBpp0084351,FBpp0085658,FBpp0085888,FBpp0086382,FBpp0086853,FBpp0087248,FBpp0111762,FBpp0290803,FBpp0292260,FBpp0293235,FBpp0300511,FBpp0300628,FBpp0302596,FBpp0302752,FBpp0304202,FBp…	Akt1,Atg3,Atg6,CG32547,Chc,Cirl,Cngl,Dop1R1,Dp,Exo84,Hsc70-4,Nsf2,Nup358,Rab35,Rab5,Rep,Rop,Rph,SNF4Agamma,Sec5,Sec6,Sec8,Snmp1,Syx18,Syx1A,Syx7,Tsp47F,alphaSnap,chico,eIF-1A,eRF1,hid,msk,mys,shark,shi,sno
GO:0045595	regulation of cell differentiation	17	356	2.49e-06	FBpp0070672,FBpp0072306,FBpp0073173,FBpp0073572,FBpp0074899,FBpp0076487,FBpp0082682,FBpp0082743,FBpp0083434,FBpp0086591,FBpp0086853,FBpp0087921,FBpp0111818,FBpp0292260,FBpp0301099,FBpp0302752,FBpp0304475	Akt1,Bap60,CSN5,Cul1,Dp,Rop,Rpd3,SMC2,Sec23,Syx1A,TER94,cher,ctp,hid,pbl,slmb,zip
GO:0050793	regulation of developmental process	24	703	2.49e-06	FBpp0070672,FBpp0071061,FBpp0072306,FBpp0073173,FBpp0073572,FBpp0074899,FBpp0076487,FBpp0076806,FBpp0078326,FBpp0079677,FBpp0082346,FBpp0082682,FBpp0082743,FBpp0083434,FBpp0086382,FBpp0086591,FBpp0086853,FBpp0087921,FBpp0111818,FBpp0291363,FBpp0292260,FBpp0301099,FBpp0302752,FBpp0304475	Akt1,Bap60,CSN5,Cul1,Dp,Nsf2,Rop,Rpd3,SMC2,Sec23,Sec8,Syx1A,TER94,cher,chico,ctp,hid,mgl,mys,pbl,scny,shark,slmb,zip
GO:0044267	cellular protein metabolic process	39	1644	2.54e-06	FBpp0070430,FBpp0070457,FBpp0071848,FBpp0072908,FBpp0073173,FBpp0073893,FBpp0074756,FBpp0074841,FBpp0076287,FBpp0076806,FBpp0077251,FBpp0077473,FBpp0078013,FBpp0078318,FBpp0078664,FBpp0079680,FBpp0082682,FBpp0082743,FBpp0082994,FBpp0083434,FBpp0083658,FBpp0084021,FBpp0085658,FBpp0085902,FBpp0086382,FBpp0086603,FBpp0086705,FBpp0087921,FBpp0087958,FBpp0089041,FBpp0089217,FBpp0111818,FBpp0293235,FBp…	Akt1,CG17737,CG2051,CG33123,CG3806,CG5660,CG5706,CG6094,CG8636,CG8728,CSN1b,CSN5,CSN6,Cdc27,Cdk12,Cdk9,Cul1,EF2,Elf,Nup358,Prosalpha7,Prp19,Rab5,Rep,Rpd3,Rpn11,Rpn6,TER94,Tango7,alien,eIF-1A,eIF2B-beta,eIF5B,eRF1,rept,scny,shark,shtd,slmb
GO:0050658	RNA transport	10	105	3.21e-06	FBpp0071905,FBpp0073659,FBpp0073966,FBpp0079278,FBpp0080138,FBpp0082137,FBpp0082568,FBpp0083646,FBpp0084900,FBpp0293235	AP-2mu,Chc,Nup214,Nup358,Nup93-1,Smg5,emb,ldlCp,mbo,ncd
GO:0016477	cell migration	15	280	3.33e-06	FBpp0070402,FBpp0071061,FBpp0072306,FBpp0076487,FBpp0077208,FBpp0077473,FBpp0077941,FBpp0078326,FBpp0082682,FBpp0082743,FBpp0083434,FBpp0085063,FBpp0085888,FBpp0086382,FBpp0305866	Akt1,CSN5,Rab5,Sec5,Sec6,Sec8,crn,kni,mys,pbl,shark,shi,slmb,zfh1,zip
GO:0030727	germarium-derived female germ-line cyst formation	6	21	3.43e-06	FBpp0074841,FBpp0082743,FBpp0083434,FBpp0087926,FBpp0294043,FBpp0303869	AGO1,CSN1b,CSN5,alien,drosha,slmb
GO:0048138	germ-line cyst encapsulation	6	21	3.43e-06	FBpp0074841,FBpp0082743,FBpp0083434,FBpp0083658,FBpp0303869,FBpp0304475	CSN1b,CSN5,CSN6,alien,cher,slmb
GO:0007049	cell cycle	21	565	3.98e-06	FBpp0070672,FBpp0072306,FBpp0072616,FBpp0073659,FBpp0074609,FBpp0076487,FBpp0077134,FBpp0077208,FBpp0078326,FBpp0079278,FBpp0084351,FBpp0084831,FBpp0084900,FBpp0085619,FBpp0086853,FBpp0088945,FBpp0292260,FBpp0293235,FBpp0302752,FBpp0305729,FBpp0305866	AP-2alpha,Bub3,Dp,Exo84,HP6,Klp61F,Nup358,Nup93-1,PCNA,Rab35,Rop,Sec5,Sec8,Syx1A,alphaSnap,ctp,emb,ncd,pbl,shi,zip
GO:0007283	spermatogenesis	14	245	3.99e-06	FBpp0070672,FBpp0072438,FBpp0073966,FBpp0074841,FBpp0078326,FBpp0079677,FBpp0081484,FBpp0082743,FBpp0082817,FBpp0083658,FBpp0084351,FBpp0086705,FBpp0303869,FBpp0305866	CG11985,CG16941,CSN1b,CSN5,CSN6,Chc,Dic61B,Exo84,Sec8,Tango7,alien,chico,ctp,shi
GO:0016081	synaptic vesicle docking	6	23	5.15e-06	FBpp0077208,FBpp0078007,FBpp0078326,FBpp0084351,FBpp0085888,FBpp0292260	Exo84,Sec5,Sec6,Sec8,Syx1A,Syx7
GO:0048522	positive regulation of cellular process	32	1247	7.87e-06	FBpp0070672,FBpp0071061,FBpp0071848,FBpp0072616,FBpp0073572,FBpp0073966,FBpp0074756,FBpp0074899,FBpp0076487,FBpp0076806,FBpp0077208,FBpp0078007,FBpp0078013,FBpp0078326,FBpp0079648,FBpp0079677,FBpp0082682,FBpp0082743,FBpp0083434,FBpp0085295,FBpp0086705,FBpp0086853,FBpp0087921,FBpp0088945,FBpp0111762,FBpp0111818,FBpp0290803,FBpp0293235,FBpp0301099,FBpp0302752,FBpp0304475,FBpp0305866	AP-2alpha,Akt1,Bap60,CSN5,Cdk12,Cdk9,Chc,Cul1,CycK,Dp,Klp61F,Nup358,RnrL,Rop,SNF4Agamma,Sec23,Sec5,Sec8,Syx7,TER94,Tango7,cher,chico,ctp,hid,mys,pbl,rept,scny,shi,slmb,sno
GO:0051130	positive regulation of cellular component organization	14	262	8.27e-06	FBpp0071061,FBpp0073572,FBpp0073966,FBpp0076806,FBpp0077208,FBpp0078007,FBpp0078326,FBpp0082682,FBpp0088945,FBpp0293235,FBpp0301099,FBpp0302752,FBpp0304475,FBpp0305866	AP-2alpha,Akt1,Bap60,Chc,Nup358,Rop,Sec23,Sec5,Sec8,Syx7,cher,mys,scny,shi
GO:0060341	regulation of cellular localization	10	120	8.98e-06	FBpp0071905,FBpp0072616,FBpp0079278,FBpp0082137,FBpp0089084,FBpp0111818,FBpp0292260,FBpp0293235,FBpp0301099,FBpp0302752	Klp61F,Nup214,Nup358,Rop,Sec23,Slh,Syx1A,TER94,emb,mbo
GO:0000278	mitotic cell cycle	16	351	9.1e-06	FBpp0070672,FBpp0072306,FBpp0072616,FBpp0074609,FBpp0076487,FBpp0077208,FBpp0084831,FBpp0084900,FBpp0085619,FBpp0086853,FBpp0088945,FBpp0292260,FBpp0293235,FBpp0302752,FBpp0305729,FBpp0305866	AP-2alpha,Bub3,Dp,Klp61F,Nup358,PCNA,Rab35,Rop,Sec5,Syx1A,alphaSnap,ctp,ncd,pbl,shi,zip
GO:0060541	respiratory system development	13	231	1.21e-05	FBpp0071061,FBpp0072306,FBpp0073966,FBpp0074899,FBpp0077208,FBpp0077941,FBpp0079677,FBpp0079999,FBpp0082137,FBpp0082346,FBpp0082682,FBpp0301099,FBpp0305866	Akt1,Chc,Nsf2,Sec23,Sec5,Vha68-2,chico,hid,kni,mbo,mys,shi,zip
GO:0006928	movement of cell or subcellular component	22	680	1.74e-05	FBpp0070402,FBpp0070672,FBpp0071061,FBpp0072306,FBpp0072438,FBpp0072616,FBpp0073173,FBpp0076487,FBpp0077208,FBpp0077473,FBpp0077941,FBpp0078326,FBpp0082516,FBpp0082682,FBpp0082743,FBpp0083434,FBpp0084900,FBpp0085063,FBpp0085888,FBpp0086382,FBpp0304475,FBpp0305866	Akt1,CSN5,Dic61B,Hsc70-4,Klp61F,Rab5,Rpd3,Sec5,Sec6,Sec8,cher,crn,ctp,kni,mys,ncd,pbl,shark,shi,slmb,zfh1,zip
GO:0016333	morphogenesis of follicular epithelium	7	49	1.74e-05	FBpp0074841,FBpp0082743,FBpp0083434,FBpp0083658,FBpp0086853,FBpp0303869,FBpp0304475	CSN1b,CSN5,CSN6,Dp,alien,cher,slmb
GO:0090130	tissue migration	11	166	1.92e-05	FBpp0071061,FBpp0072306,FBpp0076487,FBpp0077208,FBpp0077473,FBpp0077941,FBpp0078326,FBpp0082682,FBpp0083434,FBpp0085888,FBpp0305866	Akt1,Rab5,Sec5,Sec6,Sec8,kni,mys,pbl,shi,slmb,zip
GO:0023052	signaling	34	1442	1.95e-05	FBpp0071061,FBpp0071431,FBpp0073966,FBpp0074609,FBpp0074899,FBpp0076408,FBpp0077208,FBpp0077473,FBpp0078007,FBpp0078326,FBpp0079677,FBpp0082346,FBpp0082516,FBpp0082682,FBpp0082994,FBpp0084050,FBpp0084351,FBpp0085658,FBpp0085888,FBpp0086382,FBpp0086853,FBpp0087248,FBpp0111762,FBpp0292260,FBpp0293235,FBpp0300511,FBpp0300628,FBpp0302596,FBpp0302752,FBpp0304202,FBpp0304652,FBpp0305729,FBpp0305866,FBp…	Akt1,CG32547,Chc,Cirl,Cngl,Dop1R1,Dp,Exo84,Hsc70-4,Nsf2,Nup358,Rab35,Rab5,Rep,Rop,Rph,Sec5,Sec6,Sec8,Snmp1,Syx18,Syx1A,Syx7,Tsp47F,alphaSnap,chico,eIF-1A,eRF1,hid,msk,mys,shark,shi,sno
GO:0006403	RNA localization	11	168	2.08e-05	FBpp0071905,FBpp0073659,FBpp0073966,FBpp0079278,FBpp0080138,FBpp0082137,FBpp0082568,FBpp0083434,FBpp0083646,FBpp0084900,FBpp0293235	AP-2mu,Chc,Nup214,Nup358,Nup93-1,Smg5,emb,ldlCp,mbo,ncd,slmb
GO:2000026	regulation of multicellular organismal development	19	526	2.08e-05	FBpp0070672,FBpp0071061,FBpp0073173,FBpp0073572,FBpp0074899,FBpp0076487,FBpp0078326,FBpp0082346,FBpp0082682,FBpp0082743,FBpp0083434,FBpp0086382,FBpp0087921,FBpp0111818,FBpp0291363,FBpp0292260,FBpp0301099,FBpp0302752,FBpp0304475	Akt1,Bap60,CSN5,Cul1,Nsf2,Rop,Rpd3,Sec23,Sec8,Syx1A,TER94,cher,ctp,hid,mgl,mys,pbl,shark,slmb
GO:0001667	ameboidal-type cell migration	11	170	2.3e-05	FBpp0071061,FBpp0072306,FBpp0076487,FBpp0077208,FBpp0077473,FBpp0077941,FBpp0078326,FBpp0082682,FBpp0083434,FBpp0085888,FBpp0305866	Akt1,Rab5,Sec5,Sec6,Sec8,kni,mys,pbl,shi,slmb,zip
GO:0048518	positive regulation of biological process	33	1393	2.53e-05	FBpp0070672,FBpp0071061,FBpp0071848,FBpp0071905,FBpp0072616,FBpp0073572,FBpp0073966,FBpp0074756,FBpp0074899,FBpp0076487,FBpp0076806,FBpp0077208,FBpp0078007,FBpp0078013,FBpp0078326,FBpp0079648,FBpp0079677,FBpp0082682,FBpp0082743,FBpp0083434,FBpp0085295,FBpp0086705,FBpp0086853,FBpp0087921,FBpp0088945,FBpp0111762,FBpp0111818,FBpp0290803,FBpp0293235,FBpp0301099,FBpp0302752,FBpp0304475,FBpp0305866	AP-2alpha,Akt1,Bap60,CSN5,Cdk12,Cdk9,Chc,Cul1,CycK,Dp,Klp61F,Nup214,Nup358,RnrL,Rop,SNF4Agamma,Sec23,Sec5,Sec8,Syx7,TER94,Tango7,cher,chico,ctp,hid,mys,pbl,rept,scny,shi,slmb,sno
GO:0006606	protein import into nucleus	7	54	2.92e-05	FBpp0071905,FBpp0073659,FBpp0076408,FBpp0077399,FBpp0082137,FBpp0293235,FBpp0294035	Fs(2)Ket,Nup214,Nup358,Nup93-1,Trn-SR,mbo,msk
GO:0006413	translational initiation	7	55	3.23e-05	FBpp0070430,FBpp0070457,FBpp0072908,FBpp0082994,FBpp0086705,FBpp0089217,FBpp0301570	CG17737,CG3806,CG8636,Tango7,eIF-1A,eIF2B-beta,eIF5B
GO:0044237	cellular metabolic process	65	3966	3.23e-05	FBpp0070402,FBpp0070430,FBpp0070457,FBpp0070672,FBpp0071562,FBpp0071848,FBpp0072908,FBpp0073173,FBpp0073828,FBpp0073893,FBpp0074756,FBpp0074822,FBpp0074841,FBpp0076287,FBpp0076806,FBpp0077134,FBpp0077251,FBpp0077473,FBpp0078013,FBpp0078318,FBpp0078664,FBpp0079648,FBpp0079680,FBpp0079874,FBpp0079999,FBpp0080121,FBpp0080138,FBpp0080622,FBpp0081156,FBpp0081484,FBpp0082139,FBpp0082516,FBpp0082682,FBp…	AGO1,Akt1,Atg3,Atg6,CG10333,CG11920,CG11985,CG12264,CG16941,CG17737,CG2051,CG33123,CG3806,CG4038,CG5660,CG5706,CG6094,CG6227,CG8636,CG8728,CSN1b,CSN5,CSN6,Cdc27,Cdk12,Cdk9,Cpsf100,Cul1,Dp,EF2,Elf,FANCI,HP6,Hsc70-4,Nup358,PCNA,Prosalpha7,Prp19,Rab5,Ref1,Rep,RnrL,RpII33,Rpd3,Rpn11,Rpn6,SNF4Agamma,Smg5,TER94,Tango7,Vha55,Vha68-2,alien,crn,ctp,drosha,eIF-1A,eIF2B-beta,eIF5B,eRF1,rept,scny,shark,shtd,…
GO:0051094	positive regulation of developmental process	12	216	3.25e-05	FBpp0070672,FBpp0071061,FBpp0076487,FBpp0076806,FBpp0078326,FBpp0079677,FBpp0082682,FBpp0083434,FBpp0086853,FBpp0087921,FBpp0301099,FBpp0302752	Akt1,Cul1,Dp,Rop,Sec23,Sec8,chico,ctp,mys,pbl,scny,slmb
GO:0065003	protein-containing complex assembly	18	493	3.25e-05	FBpp0070402,FBpp0072306,FBpp0072616,FBpp0072908,FBpp0073659,FBpp0073966,FBpp0074609,FBpp0074756,FBpp0077208,FBpp0078318,FBpp0082346,FBpp0082817,FBpp0084351,FBpp0085902,FBpp0086603,FBpp0294043,FBpp0302752,FBpp0305866	AGO1,CG16941,CG17737,CG2051,Chc,Exo84,Klp61F,Nsf2,Nup93-1,Prp19,Rop,Rpn6,Sec5,alphaSnap,crn,rept,shi,zip
GO:0006412	translation	14	304	3.7e-05	FBpp0070430,FBpp0070457,FBpp0072908,FBpp0076287,FBpp0077251,FBpp0079680,FBpp0082994,FBpp0084021,FBpp0086705,FBpp0089217,FBpp0301570,FBpp0304202,FBpp0305182,FBpp0305302	CG17737,CG33123,CG3806,CG5660,CG5706,CG6094,CG8636,EF2,Elf,Tango7,eIF-1A,eIF2B-beta,eIF5B,eRF1
GO:0061025	membrane fusion	7	57	3.87e-05	FBpp0074609,FBpp0077473,FBpp0078007,FBpp0084050,FBpp0111818,FBpp0292260,FBpp0305866	Rab5,Syx18,Syx1A,Syx7,TER94,alphaSnap,shi
GO:0007424	open tracheal system development	12	221	3.97e-05	FBpp0071061,FBpp0072306,FBpp0073966,FBpp0074899,FBpp0077208,FBpp0077941,FBpp0079677,FBpp0079999,FBpp0082137,FBpp0082682,FBpp0301099,FBpp0305866	Akt1,Chc,Sec23,Sec5,Vha68-2,chico,hid,kni,mbo,mys,shi,zip
GO:0035152	regulation of tube architecture, open tracheal system	8	84	4.22e-05	FBpp0071061,FBpp0072306,FBpp0073966,FBpp0077941,FBpp0079677,FBpp0079999,FBpp0301099,FBpp0305866	Chc,Sec23,Vha68-2,chico,kni,mys,shi,zip
GO:0044238	primary metabolic process	66	4093	4.27e-05	FBpp0070402,FBpp0070430,FBpp0070457,FBpp0071562,FBpp0071848,FBpp0072908,FBpp0073173,FBpp0073828,FBpp0073893,FBpp0074756,FBpp0074822,FBpp0074841,FBpp0076287,FBpp0076806,FBpp0077134,FBpp0077251,FBpp0077473,FBpp0078013,FBpp0078318,FBpp0078664,FBpp0079648,FBpp0079677,FBpp0079680,FBpp0079874,FBpp0079999,FBpp0080121,FBpp0080138,FBpp0080622,FBpp0081156,FBpp0081484,FBpp0082139,FBpp0082516,FBpp0082682,FBp…	AGO1,Akt1,Atg3,Atg6,CG10333,CG10663,CG11920,CG11985,CG12264,CG16941,CG17737,CG2051,CG33123,CG3806,CG4038,CG5660,CG5706,CG6094,CG6227,CG8636,CG8728,CSN1b,CSN5,CSN6,Cdc27,Cdk12,Cdk9,Cpsf100,Cul1,Dp,EF2,Elf,FANCI,HP6,Hsc70-4,Nup358,PCNA,Prosalpha7,Prp19,Rab5,Ref1,Rep,RnrL,RpII33,Rpd3,Rpn11,Rpn6,SNF4Agamma,Smg5,TER94,Tango7,Vha55,Vha68-2,alien,chico,crn,drosha,eIF-1A,eIF2B-beta,eIF5B,eRF1,rept,scny,s…
GO:0034622	cellular protein-containing complex assembly	17	454	4.38e-05	FBpp0070402,FBpp0072306,FBpp0072908,FBpp0073659,FBpp0073966,FBpp0074609,FBpp0074756,FBpp0077208,FBpp0078318,FBpp0082346,FBpp0082817,FBpp0084351,FBpp0085902,FBpp0086603,FBpp0294043,FBpp0302752,FBpp0305866	AGO1,CG16941,CG17737,CG2051,Chc,Exo84,Nsf2,Nup93-1,Prp19,Rop,Rpn6,Sec5,alphaSnap,crn,rept,shi,zip
GO:0006913	nucleocytoplasmic transport	9	115	4.44e-05	FBpp0071905,FBpp0073659,FBpp0076408,FBpp0077399,FBpp0079278,FBpp0080138,FBpp0082137,FBpp0293235,FBpp0294035	Fs(2)Ket,Nup214,Nup358,Nup93-1,Smg5,Trn-SR,emb,mbo,msk
GO:0051240	positive regulation of multicellular organismal process	12	225	4.51e-05	FBpp0070672,FBpp0071061,FBpp0076487,FBpp0076806,FBpp0078326,FBpp0079677,FBpp0082682,FBpp0083434,FBpp0086853,FBpp0087921,FBpp0301099,FBpp0302752	Akt1,Cul1,Dp,Rop,Sec23,Sec8,chico,ctp,mys,pbl,scny,slmb
GO:0034641	cellular nitrogen compound metabolic process	40	1954	4.98e-05	FBpp0070402,FBpp0070430,FBpp0070457,FBpp0071562,FBpp0071848,FBpp0072908,FBpp0073828,FBpp0076287,FBpp0077134,FBpp0077251,FBpp0078013,FBpp0079648,FBpp0079680,FBpp0079874,FBpp0079999,FBpp0080121,FBpp0080138,FBpp0080622,FBpp0081156,FBpp0081484,FBpp0082139,FBpp0082516,FBpp0082817,FBpp0082994,FBpp0084021,FBpp0084144,FBpp0084726,FBpp0085619,FBpp0085902,FBpp0086705,FBpp0086853,FBpp0087756,FBpp0087926,FBp…	AGO1,CG10333,CG11920,CG11985,CG12264,CG16941,CG17737,CG33123,CG3806,CG4038,CG5660,CG5706,CG6094,CG6227,CG8636,Cdc27,Cdk12,Cdk9,Cpsf100,Dp,EF2,Elf,FANCI,HP6,Hsc70-4,PCNA,Prp19,Ref1,RnrL,RpII33,Smg5,Tango7,Vha55,Vha68-2,crn,drosha,eIF-1A,eIF2B-beta,eIF5B,eRF1
GO:0043624	cellular protein complex disassembly	5	21	5.86e-05	FBpp0074609,FBpp0079680,FBpp0082346,FBpp0304202,FBpp0305302	CG6094,Elf,Nsf2,alphaSnap,eRF1
GO:0031032	actomyosin structure organization	8	89	5.89e-05	FBpp0071061,FBpp0072306,FBpp0074298,FBpp0076487,FBpp0078326,FBpp0084351,FBpp0304475,FBpp0305866	Exo84,Sec8,cher,mys,pbl,shi,wupA,zip
GO:0010623	programmed cell death involved in cell development	8	90	6.32e-05	FBpp0070672,FBpp0073966,FBpp0074756,FBpp0074899,FBpp0083975,FBpp0086853,FBpp0111818,FBpp0305866	Atg6,Chc,Dp,TER94,ctp,hid,rept,shi
GO:0010256	endomembrane system organization	10	156	6.39e-05	FBpp0072616,FBpp0073966,FBpp0078326,FBpp0079999,FBpp0082568,FBpp0085888,FBpp0086705,FBpp0111818,FBpp0301099,FBpp0305866	Chc,Klp61F,Sec23,Sec6,Sec8,TER94,Tango7,Vha68-2,ldlCp,shi
GO:1903429	regulation of cell maturation	6	40	6.54e-05	FBpp0070672,FBpp0083434,FBpp0087921,FBpp0111818,FBpp0292260,FBpp0302752	Cul1,Rop,Syx1A,TER94,ctp,slmb
GO:0060284	regulation of cell development	13	278	6.56e-05	FBpp0070672,FBpp0073173,FBpp0073572,FBpp0074899,FBpp0076487,FBpp0082682,FBpp0083434,FBpp0086853,FBpp0087921,FBpp0111818,FBpp0292260,FBpp0301099,FBpp0302752	Akt1,Bap60,Cul1,Dp,Rop,Rpd3,Sec23,Syx1A,TER94,ctp,hid,pbl,slmb
GO:0010631	epithelial cell migration	10	157	6.61e-05	FBpp0071061,FBpp0072306,FBpp0077208,FBpp0077473,FBpp0077941,FBpp0078326,FBpp0082682,FBpp0083434,FBpp0085888,FBpp0305866	Akt1,Rab5,Sec5,Sec6,Sec8,kni,mys,shi,slmb,zip
GO:0048140	male germ-line cyst encapsulation	4	9	7.05e-05	FBpp0074841,FBpp0082743,FBpp0083658,FBpp0303869	CSN1b,CSN5,CSN6,alien
GO:0051962	positive regulation of nervous system development	9	124	7.23e-05	FBpp0070672,FBpp0071061,FBpp0076487,FBpp0078326,FBpp0082682,FBpp0083434,FBpp0087921,FBpp0301099,FBpp0302752	Akt1,Cul1,Rop,Sec23,Sec8,ctp,mys,pbl,slmb
GO:0061024	membrane organization	11	200	8.2e-05	FBpp0074609,FBpp0077473,FBpp0078007,FBpp0078326,FBpp0082516,FBpp0084050,FBpp0085888,FBpp0088945,FBpp0111818,FBpp0292260,FBpp0305866	AP-2alpha,Hsc70-4,Rab5,Sec6,Sec8,Syx18,Syx1A,Syx7,TER94,alphaSnap,shi
GO:0000338	protein deneddylation	4	10	9.63e-05	FBpp0074841,FBpp0082743,FBpp0083658,FBpp0303869	CSN1b,CSN5,CSN6,alien
GO:0016080	synaptic vesicle targeting	4	10	9.63e-05	FBpp0077208,FBpp0078326,FBpp0084351,FBpp0085888	Exo84,Sec5,Sec6,Sec8
GO:0036099	female germ-line stem cell population maintenance	5	24	9.63e-05	FBpp0074841,FBpp0082743,FBpp0083658,FBpp0294043,FBpp0303869	AGO1,CSN1b,CSN5,CSN6,alien
GO:0045666	positive regulation of neuron differentiation	7	68	9.63e-05	FBpp0070672,FBpp0076487,FBpp0082682,FBpp0083434,FBpp0087921,FBpp0301099,FBpp0302752	Akt1,Cul1,Rop,Sec23,ctp,pbl,slmb
GO:0072659	protein localization to plasma membrane	5	24	9.63e-05	FBpp0077208,FBpp0084351,FBpp0085888,FBpp0301099,FBpp0305866	Exo84,Sec23,Sec5,Sec6,shi
GO:0007399	nervous system development	26	1028	0.0001	FBpp0070402,FBpp0070672,FBpp0071061,FBpp0072306,FBpp0073173,FBpp0073572,FBpp0074298,FBpp0074899,FBpp0076408,FBpp0076487,FBpp0077473,FBpp0082516,FBpp0082682,FBpp0082743,FBpp0083434,FBpp0083975,FBpp0085063,FBpp0085888,FBpp0086941,FBpp0087921,FBpp0087926,FBpp0111818,FBpp0294043,FBpp0301099,FBpp0302752,FBpp0304475	AGO1,Akt1,Amph,Atg6,Bap60,CSN5,Cul1,Hsc70-4,Rab5,Rop,Rpd3,Sec23,Sec6,TER94,cher,crn,ctp,drosha,hid,msk,mys,pbl,slmb,wupA,zfh1,zip
GO:0007163	establishment or maintenance of cell polarity	11	208	0.00011	FBpp0070672,FBpp0072306,FBpp0073966,FBpp0076408,FBpp0077473,FBpp0078007,FBpp0083434,FBpp0084351,FBpp0086382,FBpp0086853,FBpp0301099	Chc,Dp,Exo84,Rab5,Sec23,Syx7,ctp,msk,shark,slmb,zip
GO:0007349	cellularization	8	99	0.00011	FBpp0070672,FBpp0073966,FBpp0077208,FBpp0077473,FBpp0086705,FBpp0111818,FBpp0292260,FBpp0305866	Chc,Rab5,Sec5,Syx1A,TER94,Tango7,ctp,shi
GO:0040011	locomotion	19	608	0.00012	FBpp0070402,FBpp0071061,FBpp0072306,FBpp0073173,FBpp0076487,FBpp0077208,FBpp0077473,FBpp0077941,FBpp0078326,FBpp0082516,FBpp0082682,FBpp0082743,FBpp0083434,FBpp0085063,FBpp0085888,FBpp0086382,FBpp0300511,FBpp0304475,FBpp0305866	Akt1,CSN5,Dop1R1,Hsc70-4,Rab5,Rpd3,Sec5,Sec6,Sec8,cher,crn,kni,mys,pbl,shark,shi,slmb,zfh1,zip
GO:0051050	positive regulation of transport	8	100	0.00012	FBpp0071905,FBpp0072616,FBpp0073966,FBpp0077208,FBpp0078007,FBpp0088945,FBpp0293235,FBpp0301099	AP-2alpha,Chc,Klp61F,Nup214,Nup358,Sec23,Sec5,Syx7
GO:0010927	cellular component assembly involved in morphogenesis	9	137	0.00014	FBpp0071061,FBpp0072306,FBpp0074298,FBpp0083434,FBpp0085619,FBpp0086382,FBpp0086853,FBpp0304475,FBpp0305866	Dp,PCNA,cher,mys,shark,shi,slmb,wupA,zip
GO:0071704	organic substance metabolic process	68	4432	0.00014	FBpp0070402,FBpp0070430,FBpp0070457,FBpp0071562,FBpp0071848,FBpp0072908,FBpp0073173,FBpp0073659,FBpp0073828,FBpp0073893,FBpp0074756,FBpp0074822,FBpp0074841,FBpp0076287,FBpp0076806,FBpp0077134,FBpp0077251,FBpp0077473,FBpp0078013,FBpp0078318,FBpp0078664,FBpp0079648,FBpp0079677,FBpp0079680,FBpp0079874,FBpp0079999,FBpp0080121,FBpp0080138,FBpp0080622,FBpp0081156,FBpp0081484,FBpp0082137,FBpp0082139,FBp…	AGO1,Akt1,Atg3,Atg6,CG10333,CG10663,CG11920,CG11985,CG12264,CG16941,CG17737,CG2051,CG33123,CG3806,CG4038,CG5660,CG5706,CG6094,CG6227,CG8636,CG8728,CSN1b,CSN5,CSN6,Cdc27,Cdk12,Cdk9,Cpsf100,Cul1,Dp,EF2,Elf,FANCI,HP6,Hsc70-4,Nup358,Nup93-1,PCNA,Prosalpha7,Prp19,Rab5,Ref1,Rep,RnrL,RpII33,Rpd3,Rpn11,Rpn6,SNF4Agamma,Smg5,TER94,Tango7,Vha55,Vha68-2,alien,chico,crn,drosha,eIF-1A,eIF2B-beta,eIF5B,eRF1,mbo…
GO:0006807	nitrogen compound metabolic process	62	3900	0.00015	FBpp0070402,FBpp0070430,FBpp0070457,FBpp0071562,FBpp0071848,FBpp0072908,FBpp0073173,FBpp0073828,FBpp0073893,FBpp0074756,FBpp0074841,FBpp0076287,FBpp0076806,FBpp0077134,FBpp0077251,FBpp0077473,FBpp0078013,FBpp0078318,FBpp0078664,FBpp0079648,FBpp0079680,FBpp0079874,FBpp0079999,FBpp0080121,FBpp0080138,FBpp0080622,FBpp0081156,FBpp0081484,FBpp0082139,FBpp0082516,FBpp0082682,FBpp0082743,FBpp0082817,FBp…	AGO1,Akt1,CG10333,CG10663,CG11920,CG11985,CG12264,CG16941,CG17737,CG2051,CG33123,CG3806,CG4038,CG5660,CG5706,CG6094,CG6227,CG8636,CG8728,CSN1b,CSN5,CSN6,Cdc27,Cdk12,Cdk9,Cpsf100,Cul1,Dp,EF2,Elf,FANCI,HP6,Hsc70-4,Nup358,PCNA,Prosalpha7,Prp19,Rab5,Ref1,Rep,RnrL,RpII33,Rpd3,Rpn11,Rpn6,Smg5,TER94,Tango7,Vha55,Vha68-2,alien,crn,drosha,eIF-1A,eIF2B-beta,eIF5B,eRF1,rept,scny,shark,shtd,slmb
GO:0030718	germ-line stem cell population maintenance	7	74	0.00015	FBpp0071061,FBpp0074841,FBpp0076806,FBpp0082743,FBpp0083658,FBpp0294043,FBpp0303869	AGO1,CSN1b,CSN5,CSN6,alien,mys,scny
GO:0050896	response to stimulus	47	2621	0.00016	FBpp0070457,FBpp0071061,FBpp0071848,FBpp0072306,FBpp0072908,FBpp0073173,FBpp0074756,FBpp0074822,FBpp0074899,FBpp0076408,FBpp0077208,FBpp0077251,FBpp0077473,FBpp0079648,FBpp0079677,FBpp0080121,FBpp0082137,FBpp0082516,FBpp0082682,FBpp0082994,FBpp0083975,FBpp0085063,FBpp0085619,FBpp0085658,FBpp0085902,FBpp0086382,FBpp0086853,FBpp0087248,FBpp0087756,FBpp0087926,FBpp0089084,FBpp0111762,FBpp0111818,FBp…	AGO1,Akt1,Atg3,Atg6,CG17737,CG32547,CG33123,Cdk9,Cirl,Cngl,Dop1R1,Dp,FANCI,Fer1HCH,Hsc70-4,Nup358,PCNA,Prp19,Rab35,Rab5,Rep,RnrL,Rop,RpII33,Rpd3,SNF4Agamma,Sec5,Slh,Snmp1,TER94,Tsp47F,cher,chico,drosha,eIF-1A,eIF2B-beta,eRF1,hid,mbo,msk,mys,rept,shark,shi,sno,zfh1,zip
GO:0042127	regulation of cell population proliferation	11	221	0.00018	FBpp0073173,FBpp0073572,FBpp0074756,FBpp0077473,FBpp0078007,FBpp0079677,FBpp0082682,FBpp0082743,FBpp0083434,FBpp0086382,FBpp0293235	Akt1,Bap60,CSN5,Nup358,Rab5,Rpd3,Syx7,chico,rept,shark,slmb
GO:0022008	neurogenesis	23	875	0.00019	FBpp0070402,FBpp0070672,FBpp0071061,FBpp0072306,FBpp0073173,FBpp0073572,FBpp0074899,FBpp0076408,FBpp0076487,FBpp0077473,FBpp0082516,FBpp0082682,FBpp0082743,FBpp0083434,FBpp0083975,FBpp0085063,FBpp0085888,FBpp0086941,FBpp0087921,FBpp0111818,FBpp0301099,FBpp0302752,FBpp0304475	Akt1,Amph,Atg6,Bap60,CSN5,Cul1,Hsc70-4,Rab5,Rop,Rpd3,Sec23,Sec6,TER94,cher,crn,ctp,hid,msk,mys,pbl,slmb,zfh1,zip
GO:0010720	positive regulation of cell development	8	109	0.0002	FBpp0070672,FBpp0076487,FBpp0082682,FBpp0083434,FBpp0086853,FBpp0087921,FBpp0301099,FBpp0302752	Akt1,Cul1,Dp,Rop,Sec23,ctp,pbl,slmb
GO:0032386	regulation of intracellular transport	6	51	0.0002	FBpp0071905,FBpp0079278,FBpp0082137,FBpp0089084,FBpp0293235,FBpp0301099	Nup214,Nup358,Sec23,Slh,emb,mbo
GO:0072657	protein localization to membrane	7	80	0.00023	FBpp0073659,FBpp0077208,FBpp0078326,FBpp0084351,FBpp0085888,FBpp0301099,FBpp0305866	Exo84,Nup93-1,Sec23,Sec5,Sec6,Sec8,shi
GO:0032984	protein-containing complex disassembly	6	53	0.00024	FBpp0074609,FBpp0079680,FBpp0082346,FBpp0111818,FBpp0304202,FBpp0305302	CG6094,Elf,Nsf2,TER94,alphaSnap,eRF1
GO:0048699	generation of neurons	22	832	0.00027	FBpp0070672,FBpp0071061,FBpp0072306,FBpp0073173,FBpp0073572,FBpp0074899,FBpp0076408,FBpp0076487,FBpp0077473,FBpp0082516,FBpp0082682,FBpp0082743,FBpp0083434,FBpp0083975,FBpp0085063,FBpp0085888,FBpp0086941,FBpp0087921,FBpp0111818,FBpp0301099,FBpp0302752,FBpp0304475	Akt1,Amph,Atg6,Bap60,CSN5,Cul1,Hsc70-4,Rab5,Rop,Rpd3,Sec23,Sec6,TER94,cher,ctp,hid,msk,mys,pbl,slmb,zfh1,zip
GO:0051235	maintenance of location	6	55	0.00029	FBpp0071905,FBpp0072306,FBpp0076487,FBpp0082137,FBpp0290803,FBpp0304479	Fer1HCH,Nup214,SNF4Agamma,mbo,pbl,zip
GO:0007010	cytoskeleton organization	17	540	0.0003	FBpp0070672,FBpp0071061,FBpp0072306,FBpp0072616,FBpp0073966,FBpp0074298,FBpp0076487,FBpp0078326,FBpp0079278,FBpp0082964,FBpp0084351,FBpp0084900,FBpp0085619,FBpp0111818,FBpp0293235,FBpp0304475,FBpp0305866	CG7794,Chc,Exo84,Klp61F,Nup358,PCNA,Sec8,TER94,cher,ctp,emb,mys,ncd,pbl,shi,wupA,zip
GO:0043067	regulation of programmed cell death	11	236	0.00031	FBpp0074756,FBpp0074899,FBpp0076408,FBpp0076806,FBpp0079648,FBpp0082682,FBpp0083434,FBpp0086705,FBpp0086853,FBpp0087921,FBpp0111818	Akt1,Cul1,Dp,RnrL,TER94,Tango7,hid,msk,rept,scny,slmb
GO:0048519	negative regulation of biological process	30	1380	0.00031	FBpp0071061,FBpp0071905,FBpp0073173,FBpp0073572,FBpp0074756,FBpp0076408,FBpp0076487,FBpp0076806,FBpp0077134,FBpp0077208,FBpp0077473,FBpp0077941,FBpp0078007,FBpp0078318,FBpp0079677,FBpp0080138,FBpp0082137,FBpp0082516,FBpp0082682,FBpp0082743,FBpp0083434,FBpp0084831,FBpp0085063,FBpp0087921,FBpp0087926,FBpp0111818,FBpp0294043,FBpp0303869,FBpp0304475,FBpp0305866	AGO1,Akt1,Bap60,Bub3,CG2051,CSN5,Cul1,HP6,Hsc70-4,Nup214,Rab5,Rpd3,Sec5,Smg5,Syx7,TER94,alien,cher,chico,drosha,kni,mbo,msk,mys,pbl,rept,scny,shi,slmb,zfh1
GO:0048193	Golgi vesicle transport	8	118	0.00032	FBpp0074609,FBpp0077208,FBpp0078326,FBpp0080048,FBpp0082568,FBpp0084050,FBpp0085888,FBpp0089084	Sec5,Sec6,Sec8,Slh,Syx18,alphaSnap,beta'COP,ldlCp
GO:0051651	maintenance of location in cell	5	33	0.00032	FBpp0071905,FBpp0072306,FBpp0076487,FBpp0082137,FBpp0304479	Fer1HCH,Nup214,mbo,pbl,zip
GO:0007298	border follicle cell migration	8	120	0.00036	FBpp0071061,FBpp0072306,FBpp0077208,FBpp0077473,FBpp0078326,FBpp0083434,FBpp0085888,FBpp0305866	Rab5,Sec5,Sec6,Sec8,mys,shi,slmb,zip
GO:0090090	negative regulation of canonical Wnt signaling pathway	5	34	0.00036	FBpp0074756,FBpp0076487,FBpp0083434,FBpp0087921,FBpp0111818	Cul1,TER94,pbl,rept,slmb
GO:0090304	nucleic acid metabolic process	27	1184	0.00036	FBpp0070402,FBpp0071562,FBpp0071848,FBpp0073828,FBpp0076287,FBpp0077134,FBpp0077251,FBpp0078013,FBpp0079648,FBpp0079874,FBpp0080121,FBpp0080138,FBpp0080622,FBpp0081156,FBpp0081484,FBpp0082516,FBpp0082817,FBpp0084021,FBpp0084144,FBpp0084726,FBpp0085619,FBpp0085902,FBpp0086853,FBpp0087756,FBpp0087926,FBpp0294043,FBpp0305561	AGO1,CG10333,CG11920,CG11985,CG12264,CG16941,CG33123,CG4038,CG5660,CG5706,CG6227,Cdc27,Cdk12,Cdk9,Cpsf100,Dp,FANCI,HP6,Hsc70-4,PCNA,Prp19,Ref1,RnrL,RpII33,Smg5,crn,drosha
GO:0019538	protein metabolic process	40	2158	0.0004	FBpp0070430,FBpp0070457,FBpp0071848,FBpp0072908,FBpp0073173,FBpp0073893,FBpp0074756,FBpp0074841,FBpp0076287,FBpp0076806,FBpp0077251,FBpp0077473,FBpp0078013,FBpp0078318,FBpp0078664,FBpp0079680,FBpp0082682,FBpp0082743,FBpp0082994,FBpp0083434,FBpp0083658,FBpp0084021,FBpp0085658,FBpp0085902,FBpp0086382,FBpp0086603,FBpp0086705,FBpp0087921,FBpp0087958,FBpp0089041,FBpp0089217,FBpp0111818,FBpp0112080,FBp…	Akt1,CG10663,CG17737,CG2051,CG33123,CG3806,CG5660,CG5706,CG6094,CG8636,CG8728,CSN1b,CSN5,CSN6,Cdc27,Cdk12,Cdk9,Cul1,EF2,Elf,Nup358,Prosalpha7,Prp19,Rab5,Rep,Rpd3,Rpn11,Rpn6,TER94,Tango7,alien,eIF-1A,eIF2B-beta,eIF5B,eRF1,rept,scny,shark,shtd,slmb
GO:0006518	peptide metabolic process	14	393	0.00042	FBpp0070430,FBpp0070457,FBpp0072908,FBpp0076287,FBpp0077251,FBpp0079680,FBpp0082994,FBpp0084021,FBpp0086705,FBpp0089217,FBpp0301570,FBpp0304202,FBpp0305182,FBpp0305302	CG17737,CG33123,CG3806,CG5660,CG5706,CG6094,CG8636,EF2,Elf,Tango7,eIF-1A,eIF2B-beta,eIF5B,eRF1
GO:0016070	RNA metabolic process	23	931	0.00045	FBpp0070402,FBpp0071562,FBpp0071848,FBpp0073828,FBpp0076287,FBpp0077251,FBpp0078013,FBpp0079874,FBpp0080121,FBpp0080138,FBpp0080622,FBpp0081156,FBpp0081484,FBpp0082516,FBpp0082817,FBpp0084021,FBpp0084144,FBpp0084726,FBpp0085619,FBpp0085902,FBpp0087926,FBpp0294043,FBpp0305561	AGO1,CG10333,CG11920,CG11985,CG12264,CG16941,CG33123,CG4038,CG5660,CG5706,CG6227,Cdc27,Cdk12,Cdk9,Cpsf100,Hsc70-4,PCNA,Prp19,Ref1,RpII33,Smg5,crn,drosha
GO:0016050	vesicle organization	7	91	0.00046	FBpp0073966,FBpp0074609,FBpp0077473,FBpp0078007,FBpp0079999,FBpp0292260,FBpp0305866	Chc,Rab5,Syx1A,Syx7,Vha68-2,alphaSnap,shi
GO:0060033	anatomical structure regression	6	62	0.0005	FBpp0070672,FBpp0074756,FBpp0074899,FBpp0083975,FBpp0087926,FBpp0111818	Atg6,TER94,ctp,drosha,hid,rept
GO:0070646	protein modification by small protein removal	6	62	0.0005	FBpp0074841,FBpp0076806,FBpp0078664,FBpp0082743,FBpp0083658,FBpp0303869	CSN1b,CSN5,CSN6,Rpn11,alien,scny
GO:0009790	embryo development	16	511	0.00052	FBpp0070402,FBpp0071061,FBpp0072306,FBpp0073173,FBpp0073966,FBpp0074899,FBpp0076487,FBpp0077473,FBpp0077941,FBpp0082516,FBpp0082743,FBpp0083434,FBpp0085063,FBpp0086382,FBpp0294043,FBpp0305866	AGO1,CSN5,Chc,Hsc70-4,Rab5,Rpd3,crn,hid,kni,mys,pbl,shark,shi,slmb,zfh1,zip
GO:0044087	regulation of cellular component biogenesis	12	300	0.00052	FBpp0071061,FBpp0073572,FBpp0078326,FBpp0082346,FBpp0082682,FBpp0083434,FBpp0084900,FBpp0111818,FBpp0292260,FBpp0301099,FBpp0302752,FBpp0305866	Akt1,Bap60,Nsf2,Rop,Sec23,Sec8,Syx1A,TER94,mys,ncd,shi,slmb
GO:0042981	regulation of apoptotic process	10	209	0.00053	FBpp0074899,FBpp0076408,FBpp0076806,FBpp0079648,FBpp0082682,FBpp0083434,FBpp0086705,FBpp0086853,FBpp0087921,FBpp0111818	Akt1,Cul1,Dp,RnrL,TER94,Tango7,hid,msk,scny,slmb
GO:0048513	animal organ development	26	1150	0.00056	FBpp0070402,FBpp0070672,FBpp0071061,FBpp0072306,FBpp0073893,FBpp0073966,FBpp0074298,FBpp0074609,FBpp0074756,FBpp0074899,FBpp0076408,FBpp0076487,FBpp0077473,FBpp0079999,FBpp0082346,FBpp0082743,FBpp0083975,FBpp0085063,FBpp0085888,FBpp0086941,FBpp0087926,FBpp0089084,FBpp0111762,FBpp0292260,FBpp0301099,FBpp0305866	Amph,Atg6,CSN5,Chc,Nsf2,Rab5,Sec23,Sec6,Slh,Syx1A,Vha68-2,alphaSnap,crn,ctp,drosha,hid,msk,mys,pbl,rept,shi,shtd,sno,wupA,zfh1,zip
GO:1905879	regulation of oogenesis	5	39	0.0006	FBpp0083434,FBpp0086853,FBpp0111818,FBpp0292260,FBpp0302752	Dp,Rop,Syx1A,TER94,slmb
GO:0007293	germarium-derived egg chamber formation	7	97	0.00063	FBpp0074841,FBpp0082743,FBpp0083434,FBpp0087926,FBpp0294043,FBpp0303869,FBpp0304475	AGO1,CSN1b,CSN5,alien,cher,drosha,slmb
GO:0006415	translational termination	3	6	0.00067	FBpp0079680,FBpp0304202,FBpp0305302	CG6094,Elf,eRF1
GO:0032506	cytokinetic process	5	40	0.00067	FBpp0076487,FBpp0078326,FBpp0084351,FBpp0088945,FBpp0305866	AP-2alpha,Exo84,Sec8,pbl,shi
GO:0043900	regulation of multi-organism process	8	134	0.00067	FBpp0071848,FBpp0076806,FBpp0080622,FBpp0083434,FBpp0086853,FBpp0111818,FBpp0292260,FBpp0302752	CG10333,Cdk9,Dp,Rop,Syx1A,TER94,scny,slmb
GO:1902410	mitotic cytokinetic process	3	6	0.00067	FBpp0076487,FBpp0088945,FBpp0305866	AP-2alpha,pbl,shi
GO:0006405	RNA export from nucleus	6	67	0.00068	FBpp0071905,FBpp0073659,FBpp0079278,FBpp0080138,FBpp0082137,FBpp0293235	Nup214,Nup358,Nup93-1,Smg5,emb,mbo
GO:0016071	mRNA metabolic process	12	313	0.00071	FBpp0070402,FBpp0073828,FBpp0080138,FBpp0080622,FBpp0081156,FBpp0081484,FBpp0082516,FBpp0082817,FBpp0084726,FBpp0085902,FBpp0294043,FBpp0305561	AGO1,CG10333,CG11985,CG16941,CG6227,Cdc27,Cpsf100,Hsc70-4,Prp19,Ref1,Smg5,crn
GO:0090174	organelle membrane fusion	5	41	0.00072	FBpp0074609,FBpp0077473,FBpp0078007,FBpp0111818,FBpp0292260	Rab5,Syx1A,Syx7,TER94,alphaSnap
GO:0022411	cellular component disassembly	7	100	0.00073	FBpp0074609,FBpp0074822,FBpp0079680,FBpp0082346,FBpp0111818,FBpp0304202,FBpp0305302	Atg3,CG6094,Elf,Nsf2,TER94,alphaSnap,eRF1
GO:0048589	developmental growth	9	177	0.00075	FBpp0071061,FBpp0074609,FBpp0077473,FBpp0078007,FBpp0079648,FBpp0079677,FBpp0079999,FBpp0082682,FBpp0086382	Akt1,Rab5,RnrL,Syx7,Vha68-2,alphaSnap,chico,mys,shark
GO:0008283	cell population proliferation	9	178	0.00078	FBpp0072306,FBpp0074841,FBpp0076408,FBpp0082743,FBpp0083434,FBpp0087926,FBpp0294043,FBpp0303869,FBpp0304479	AGO1,CSN1b,CSN5,Fer1HCH,alien,drosha,msk,slmb,zip
GO:0009057	macromolecule catabolic process	15	482	0.00087	FBpp0073893,FBpp0074822,FBpp0076806,FBpp0078664,FBpp0080138,FBpp0083434,FBpp0083975,FBpp0086603,FBpp0087921,FBpp0087926,FBpp0089041,FBpp0111818,FBpp0293235,FBpp0294043,FBpp0305561	AGO1,Atg3,Atg6,Cdc27,Cul1,Nup358,Prosalpha7,Rpn11,Rpn6,Smg5,TER94,drosha,scny,shtd,slmb
GO:0031329	regulation of cellular catabolic process	9	182	0.0009	FBpp0074899,FBpp0076806,FBpp0079677,FBpp0080138,FBpp0082682,FBpp0082743,FBpp0083434,FBpp0087921,FBpp0111818	Akt1,CSN5,Cul1,Smg5,TER94,chico,hid,scny,slmb
GO:0046825	regulation of protein export from nucleus	3	7	0.0009	FBpp0071905,FBpp0079278,FBpp0082137	Nup214,emb,mbo
GO:0051960	regulation of nervous system development	12	324	0.00093	FBpp0070672,FBpp0071061,FBpp0073173,FBpp0073572,FBpp0076487,FBpp0078326,FBpp0082346,FBpp0082682,FBpp0083434,FBpp0087921,FBpp0301099,FBpp0302752	Akt1,Bap60,Cul1,Nsf2,Rop,Rpd3,Sec23,Sec8,ctp,mys,pbl,slmb
GO:0051716	cellular response to stimulus	33	1710	0.00095	FBpp0070457,FBpp0071061,FBpp0072306,FBpp0072908,FBpp0074822,FBpp0074899,FBpp0076408,FBpp0077473,FBpp0079677,FBpp0080121,FBpp0082516,FBpp0082682,FBpp0082994,FBpp0083975,FBpp0085619,FBpp0085658,FBpp0085902,FBpp0086382,FBpp0086853,FBpp0087248,FBpp0087756,FBpp0087926,FBpp0111762,FBpp0290803,FBpp0293235,FBpp0294043,FBpp0300511,FBpp0300628,FBpp0302596,FBpp0304202,FBpp0304652,FBpp0305729,FBpp0306056	AGO1,Akt1,Atg3,Atg6,CG17737,CG32547,Cirl,Cngl,Dop1R1,Dp,FANCI,Hsc70-4,Nup358,PCNA,Prp19,Rab35,Rab5,Rep,RpII33,SNF4Agamma,Snmp1,Tsp47F,chico,drosha,eIF-1A,eIF2B-beta,eRF1,hid,msk,mys,shark,sno,zip
GO:0007017	microtubule-based process	14	434	0.001	FBpp0070672,FBpp0072306,FBpp0072438,FBpp0072616,FBpp0073966,FBpp0076487,FBpp0078326,FBpp0079278,FBpp0082964,FBpp0084351,FBpp0084900,FBpp0085619,FBpp0111818,FBpp0293235	CG7794,Chc,Dic61B,Exo84,Klp61F,Nup358,PCNA,Sec8,TER94,ctp,emb,ncd,pbl,zip
GO:0008152	metabolic process	70	4926	0.0011	FBpp0070402,FBpp0070430,FBpp0070457,FBpp0070672,FBpp0071562,FBpp0071848,FBpp0072908,FBpp0073173,FBpp0073659,FBpp0073828,FBpp0073893,FBpp0074756,FBpp0074822,FBpp0074841,FBpp0076287,FBpp0076806,FBpp0077134,FBpp0077221,FBpp0077251,FBpp0077473,FBpp0078013,FBpp0078318,FBpp0078664,FBpp0079648,FBpp0079677,FBpp0079680,FBpp0079874,FBpp0079999,FBpp0080121,FBpp0080138,FBpp0080622,FBpp0081156,FBpp0081484,FBp…	AGO1,Akt1,Atg3,Atg6,CG10333,CG10663,CG11920,CG11985,CG12264,CG16941,CG17737,CG2051,CG33123,CG3806,CG4038,CG5660,CG5706,CG6094,CG6227,CG8636,CG8728,CSN1b,CSN5,CSN6,Cdc27,Cdk12,Cdk9,Cpsf100,Cul1,Dot,Dp,EF2,Elf,FANCI,HP6,Hsc70-4,Nup358,Nup93-1,PCNA,Prosalpha7,Prp19,Rab5,Ref1,Rep,RnrL,RpII33,Rpd3,Rpn11,Rpn6,SNF4Agamma,Smg5,TER94,Tango7,Vha55,Vha68-2,alien,chico,crn,ctp,drosha,eIF-1A,eIF2B-beta,eIF5B,…
GO:0033043	regulation of organelle organization	13	382	0.0011	FBpp0071061,FBpp0073173,FBpp0073572,FBpp0076806,FBpp0077208,FBpp0077941,FBpp0083434,FBpp0084831,FBpp0084900,FBpp0293235,FBpp0301099,FBpp0304475,FBpp0305866	Bap60,Bub3,Nup358,Rpd3,Sec23,Sec5,cher,kni,mys,ncd,scny,shi,slmb
GO:0034645	cellular macromolecule biosynthetic process	21	863	0.0011	FBpp0070430,FBpp0070457,FBpp0071848,FBpp0072908,FBpp0076287,FBpp0077251,FBpp0078013,FBpp0079648,FBpp0079680,FBpp0080121,FBpp0080138,FBpp0082994,FBpp0084021,FBpp0085619,FBpp0086705,FBpp0086853,FBpp0089217,FBpp0301570,FBpp0304202,FBpp0305182,FBpp0305302	CG17737,CG33123,CG3806,CG5660,CG5706,CG6094,CG8636,Cdk12,Cdk9,Dp,EF2,Elf,PCNA,RnrL,RpII33,Smg5,Tango7,eIF-1A,eIF2B-beta,eIF5B,eRF1
GO:0035239	tube morphogenesis	15	493	0.0011	FBpp0070402,FBpp0070672,FBpp0071061,FBpp0072306,FBpp0074609,FBpp0074756,FBpp0074899,FBpp0076408,FBpp0076487,FBpp0077208,FBpp0077473,FBpp0079999,FBpp0082137,FBpp0111762,FBpp0301099	Rab5,Sec23,Sec5,Vha68-2,alphaSnap,crn,ctp,hid,mbo,msk,mys,pbl,rept,sno,zip
GO:0070647	protein modification by small protein conjugation or removal	11	282	0.0011	FBpp0073893,FBpp0074841,FBpp0076806,FBpp0078664,FBpp0082743,FBpp0083434,FBpp0083658,FBpp0085902,FBpp0087921,FBpp0303869,FBpp0305561	CSN1b,CSN5,CSN6,Cdc27,Cul1,Prp19,Rpn11,alien,scny,shtd,slmb
GO:0072594	establishment of protein localization to organelle	8	146	0.0011	FBpp0071905,FBpp0073659,FBpp0076408,FBpp0077399,FBpp0082137,FBpp0087958,FBpp0293235,FBpp0294035	CG8728,Fs(2)Ket,Nup214,Nup358,Nup93-1,Trn-SR,mbo,msk
GO:0007296	vitellogenesis	3	8	0.0012	FBpp0077473,FBpp0079677,FBpp0305866	Rab5,chico,shi
GO:0046822	regulation of nucleocytoplasmic transport	4	24	0.0012	FBpp0071905,FBpp0079278,FBpp0082137,FBpp0293235	Nup214,Nup358,emb,mbo
GO:0019222	regulation of metabolic process	37	2058	0.0013	FBpp0070402,FBpp0071848,FBpp0073173,FBpp0073572,FBpp0074756,FBpp0074899,FBpp0076806,FBpp0077134,FBpp0077208,FBpp0077399,FBpp0077941,FBpp0078013,FBpp0078318,FBpp0079648,FBpp0079677,FBpp0079680,FBpp0080138,FBpp0080685,FBpp0081484,FBpp0082516,FBpp0082682,FBpp0082743,FBpp0083434,FBpp0085063,FBpp0085295,FBpp0085619,FBpp0085902,FBpp0086705,FBpp0086853,FBpp0087921,FBpp0087926,FBpp0111762,FBpp0111818,FBp…	AGO1,Akt1,Bap60,CG11985,CG2051,CG6094,CSN5,Cdk12,Cdk9,Cul1,CycK,Dp,HP6,Hsc70-4,Nup358,PCNA,Prp19,RnrL,Rpd3,Sec5,Side,Smg5,TER94,Tango7,Trn-SR,alien,chico,crn,drosha,hid,kni,rept,scny,shi,slmb,sno,zfh1
GO:0044271	cellular nitrogen compound biosynthetic process	21	881	0.0013	FBpp0070430,FBpp0070457,FBpp0071848,FBpp0072908,FBpp0076287,FBpp0077251,FBpp0078013,FBpp0079648,FBpp0079680,FBpp0080121,FBpp0080138,FBpp0082994,FBpp0084021,FBpp0085619,FBpp0086705,FBpp0086853,FBpp0089217,FBpp0301570,FBpp0304202,FBpp0305182,FBpp0305302	CG17737,CG33123,CG3806,CG5660,CG5706,CG6094,CG8636,Cdk12,Cdk9,Dp,EF2,Elf,PCNA,RnrL,RpII33,Smg5,Tango7,eIF-1A,eIF2B-beta,eIF5B,eRF1
GO:0048666	neuron development	16	565	0.0014	FBpp0071061,FBpp0073173,FBpp0074899,FBpp0076408,FBpp0076487,FBpp0077473,FBpp0082516,FBpp0082682,FBpp0082743,FBpp0083434,FBpp0083975,FBpp0085063,FBpp0085888,FBpp0086941,FBpp0111818,FBpp0304475	Akt1,Amph,Atg6,CSN5,Hsc70-4,Rab5,Rpd3,Sec6,TER94,cher,hid,msk,mys,pbl,slmb,zfh1
GO:0060249	anatomical structure homeostasis	8	152	0.0014	FBpp0071061,FBpp0072306,FBpp0074298,FBpp0077134,FBpp0079677,FBpp0080138,FBpp0111818,FBpp0300511	Dop1R1,HP6,Smg5,TER94,chico,mys,wupA,zip
GO:1903827	regulation of cellular protein localization	5	49	0.0014	FBpp0071905,FBpp0072616,FBpp0079278,FBpp0082137,FBpp0293235	Klp61F,Nup214,Nup358,emb,mbo
GO:0032989	cellular component morphogenesis	17	632	0.0015	FBpp0071061,FBpp0072306,FBpp0073173,FBpp0074298,FBpp0074899,FBpp0077473,FBpp0082516,FBpp0082743,FBpp0083434,FBpp0085063,FBpp0085619,FBpp0086382,FBpp0086853,FBpp0089084,FBpp0111818,FBpp0304475,FBpp0305866	CSN5,Dp,Hsc70-4,PCNA,Rab5,Rpd3,Slh,TER94,cher,hid,mys,shark,shi,slmb,wupA,zfh1,zip
GO:0033554	cellular response to stress	15	512	0.0015	FBpp0070457,FBpp0072908,FBpp0074822,FBpp0074899,FBpp0079677,FBpp0080121,FBpp0082516,FBpp0082682,FBpp0083975,FBpp0085619,FBpp0085902,FBpp0086382,FBpp0086853,FBpp0087756,FBpp0290803	Akt1,Atg3,Atg6,CG17737,Dp,FANCI,Hsc70-4,PCNA,Prp19,RpII33,SNF4Agamma,chico,eIF2B-beta,hid,shark
GO:0106074	aminoacyl-tRNA metabolism involved in translational fidelity	3	9	0.0015	FBpp0076287,FBpp0077251,FBpp0084021	CG33123,CG5660,CG5706
GO:0006396	RNA processing	15	516	0.0016	FBpp0070402,FBpp0071562,FBpp0073828,FBpp0079874,FBpp0080622,FBpp0081156,FBpp0081484,FBpp0082516,FBpp0082817,FBpp0084144,FBpp0084726,FBpp0085902,FBpp0087926,FBpp0294043,FBpp0305561	AGO1,CG10333,CG11920,CG11985,CG12264,CG16941,CG4038,CG6227,Cdc27,Cpsf100,Hsc70-4,Prp19,Ref1,crn,drosha
GO:0007051	spindle organization	7	117	0.0016	FBpp0072616,FBpp0076487,FBpp0078326,FBpp0084351,FBpp0084900,FBpp0085619,FBpp0293235	Exo84,Klp61F,Nup358,PCNA,Sec8,ncd,pbl
GO:0042592	homeostatic process	14	457	0.0016	FBpp0071061,FBpp0072306,FBpp0074298,FBpp0077134,FBpp0079677,FBpp0079999,FBpp0080138,FBpp0082139,FBpp0082682,FBpp0111818,FBpp0290803,FBpp0300511,FBpp0304479,FBpp0306056	Akt1,Dop1R1,Fer1HCH,HP6,SNF4Agamma,Smg5,Snmp1,TER94,Vha55,Vha68-2,chico,mys,wupA,zip
GO:0045664	regulation of neuron differentiation	8	157	0.0016	FBpp0070672,FBpp0073173,FBpp0076487,FBpp0082682,FBpp0083434,FBpp0087921,FBpp0301099,FBpp0302752	Akt1,Cul1,Rop,Rpd3,Sec23,ctp,pbl,slmb
GO:0000398	mRNA splicing, via spliceosome	9	202	0.0017	FBpp0070402,FBpp0073828,FBpp0080622,FBpp0081156,FBpp0081484,FBpp0082516,FBpp0082817,FBpp0085902,FBpp0305561	CG10333,CG11985,CG16941,CG6227,Cdc27,Hsc70-4,Prp19,Ref1,crn
GO:0060255	regulation of macromolecule metabolic process	35	1932	0.0017	FBpp0070402,FBpp0071848,FBpp0073173,FBpp0073572,FBpp0074756,FBpp0074899,FBpp0076806,FBpp0077134,FBpp0077208,FBpp0077399,FBpp0077941,FBpp0078013,FBpp0078318,FBpp0079648,FBpp0079680,FBpp0080138,FBpp0080685,FBpp0081484,FBpp0082516,FBpp0082743,FBpp0083434,FBpp0085063,FBpp0085295,FBpp0085619,FBpp0085902,FBpp0086705,FBpp0086853,FBpp0087921,FBpp0087926,FBpp0111762,FBpp0111818,FBpp0293235,FBpp0294043,FBp…	AGO1,Bap60,CG11985,CG2051,CG6094,CSN5,Cdk12,Cdk9,Cul1,CycK,Dp,HP6,Hsc70-4,Nup358,PCNA,Prp19,RnrL,Rpd3,Sec5,Side,Smg5,TER94,Tango7,Trn-SR,alien,crn,drosha,hid,kni,rept,scny,shi,slmb,sno,zfh1
GO:0006397	mRNA processing	10	251	0.0018	FBpp0070402,FBpp0073828,FBpp0080622,FBpp0081156,FBpp0081484,FBpp0082516,FBpp0082817,FBpp0084726,FBpp0085902,FBpp0305561	CG10333,CG11985,CG16941,CG6227,Cdc27,Cpsf100,Hsc70-4,Prp19,Ref1,crn
GO:0030100	regulation of endocytosis	5	53	0.0018	FBpp0073966,FBpp0077473,FBpp0078007,FBpp0088945,FBpp0291363	AP-2alpha,Chc,Rab5,Syx7,mgl
GO:0032507	maintenance of protein location in cell	4	28	0.0018	FBpp0071905,FBpp0072306,FBpp0076487,FBpp0082137	Nup214,mbo,pbl,zip
GO:0045862	positive regulation of proteolysis	6	84	0.0018	FBpp0074899,FBpp0079648,FBpp0083434,FBpp0086705,FBpp0087921,FBpp0111818	Cul1,RnrL,TER94,Tango7,hid,slmb
GO:0046667	compound eye retinal cell programmed cell death	3	10	0.0018	FBpp0073966,FBpp0074899,FBpp0305866	Chc,hid,shi
GO:0048142	germarium-derived cystoblast division	3	10	0.0018	FBpp0074841,FBpp0082743,FBpp0303869	CSN1b,CSN5,alien
GO:0098657	import into cell	9	204	0.0018	FBpp0073966,FBpp0077473,FBpp0083502,FBpp0083646,FBpp0083975,FBpp0086382,FBpp0088945,FBpp0304479,FBpp0305866	AP-2alpha,AP-2mu,AP-2sigma,Atg6,Chc,Fer1HCH,Rab5,shark,shi
GO:0000226	microtubule cytoskeleton organization	11	305	0.0019	FBpp0070672,FBpp0072616,FBpp0073966,FBpp0076487,FBpp0078326,FBpp0079278,FBpp0084351,FBpp0084900,FBpp0085619,FBpp0111818,FBpp0293235	Chc,Exo84,Klp61F,Nup358,PCNA,Sec8,TER94,ctp,emb,ncd,pbl
GO:0031503	protein-containing complex localization	6	85	0.0019	FBpp0073659,FBpp0079278,FBpp0080138,FBpp0082137,FBpp0084351,FBpp0085888	Exo84,Nup93-1,Sec6,Smg5,emb,mbo
GO:0071496	cellular response to external stimulus	6	85	0.0019	FBpp0072306,FBpp0074822,FBpp0074899,FBpp0079677,FBpp0083975,FBpp0290803	Atg3,Atg6,SNF4Agamma,chico,hid,zip
GO:0051726	regulation of cell cycle	11	306	0.002	FBpp0071848,FBpp0077941,FBpp0078013,FBpp0082743,FBpp0083434,FBpp0084831,FBpp0084900,FBpp0085295,FBpp0086853,FBpp0290803,FBpp0293235	Bub3,CSN5,Cdk12,Cdk9,CycK,Dp,Nup358,SNF4Agamma,kni,ncd,slmb
GO:0048523	negative regulation of cellular process	25	1198	0.0021	FBpp0071061,FBpp0073173,FBpp0073572,FBpp0074756,FBpp0076408,FBpp0076487,FBpp0076806,FBpp0077134,FBpp0077473,FBpp0077941,FBpp0078007,FBpp0078318,FBpp0079677,FBpp0082516,FBpp0082682,FBpp0082743,FBpp0083434,FBpp0084831,FBpp0085063,FBpp0087921,FBpp0111818,FBpp0294043,FBpp0303869,FBpp0304475,FBpp0305866	AGO1,Akt1,Bap60,Bub3,CG2051,CSN5,Cul1,HP6,Hsc70-4,Rab5,Rpd3,Syx7,TER94,alien,cher,chico,kni,msk,mys,pbl,rept,scny,shi,slmb,zfh1
GO:0035264	multicellular organism growth	3	11	0.0022	FBpp0078007,FBpp0079677,FBpp0082682	Akt1,Syx7,chico
GO:0072583	clathrin-dependent endocytosis	3	11	0.0022	FBpp0077473,FBpp0088945,FBpp0305866	AP-2alpha,Rab5,shi
GO:0006892	post-Golgi vesicle-mediated transport	4	30	0.0023	FBpp0077208,FBpp0078326,FBpp0085888,FBpp0089084	Sec5,Sec6,Sec8,Slh
GO:0043068	positive regulation of programmed cell death	6	89	0.0023	FBpp0074756,FBpp0074899,FBpp0079648,FBpp0086705,FBpp0086853,FBpp0111818	Dp,RnrL,TER94,Tango7,hid,rept
GO:0044837	actomyosin contractile ring organization	4	30	0.0023	FBpp0076487,FBpp0078326,FBpp0084351,FBpp0305866	Exo84,Sec8,pbl,shi
GO:0050821	protein stabilization	4	30	0.0023	FBpp0074841,FBpp0082743,FBpp0083658,FBpp0303869	CSN1b,CSN5,CSN6,alien
GO:0002165	instar larval or pupal development	15	542	0.0024	FBpp0070672,FBpp0071061,FBpp0072306,FBpp0074609,FBpp0074756,FBpp0074899,FBpp0076408,FBpp0077473,FBpp0078007,FBpp0083975,FBpp0087926,FBpp0111762,FBpp0111818,FBpp0301099,FBpp0306056	Atg6,Rab5,Sec23,Snmp1,Syx7,TER94,alphaSnap,ctp,drosha,hid,msk,mys,rept,sno,zip
GO:0007427	epithelial cell migration, open tracheal system	4	31	0.0025	FBpp0071061,FBpp0077941,FBpp0082682,FBpp0305866	Akt1,kni,mys,shi
GO:0006914	autophagy	6	91	0.0026	FBpp0070672,FBpp0074822,FBpp0082516,FBpp0083975,FBpp0111818,FBpp0290803	Atg3,Atg6,Hsc70-4,SNF4Agamma,TER94,ctp
GO:0007111	meiosis II cytokinesis	3	12	0.0026	FBpp0076487,FBpp0078326,FBpp0084351	Exo84,Sec8,pbl
GO:0007431	salivary gland development	7	129	0.0026	FBpp0070672,FBpp0071061,FBpp0072306,FBpp0074756,FBpp0074899,FBpp0087926,FBpp0305866	ctp,drosha,hid,mys,rept,shi,zip
GO:0030182	neuron differentiation	17	671	0.0026	FBpp0071061,FBpp0072306,FBpp0073173,FBpp0074899,FBpp0076408,FBpp0076487,FBpp0077473,FBpp0082516,FBpp0082682,FBpp0082743,FBpp0083434,FBpp0083975,FBpp0085063,FBpp0085888,FBpp0086941,FBpp0111818,FBpp0304475	Akt1,Amph,Atg6,CSN5,Hsc70-4,Rab5,Rpd3,Sec6,TER94,cher,hid,msk,mys,pbl,slmb,zfh1,zip
GO:0080090	regulation of primary metabolic process	33	1827	0.0026	FBpp0070402,FBpp0071848,FBpp0073173,FBpp0073572,FBpp0074756,FBpp0074899,FBpp0076806,FBpp0077134,FBpp0077399,FBpp0077941,FBpp0078013,FBpp0078318,FBpp0079648,FBpp0079677,FBpp0079680,FBpp0080138,FBpp0080685,FBpp0082516,FBpp0082682,FBpp0082743,FBpp0083434,FBpp0085063,FBpp0085295,FBpp0085619,FBpp0085902,FBpp0086705,FBpp0086853,FBpp0087921,FBpp0111762,FBpp0111818,FBpp0294043,FBpp0303869,FBpp0305866	AGO1,Akt1,Bap60,CG2051,CG6094,CSN5,Cdk12,Cdk9,Cul1,CycK,Dp,HP6,Hsc70-4,PCNA,Prp19,RnrL,Rpd3,Side,Smg5,TER94,Tango7,Trn-SR,alien,chico,crn,hid,kni,rept,scny,shi,slmb,sno,zfh1
GO:0007028	cytoplasm organization	5	59	0.0027	FBpp0073966,FBpp0077473,FBpp0079677,FBpp0083434,FBpp0305866	Chc,Rab5,chico,shi,slmb
GO:0009791	post-embryonic development	16	611	0.0027	FBpp0070672,FBpp0071061,FBpp0072306,FBpp0074609,FBpp0074756,FBpp0074899,FBpp0076408,FBpp0077473,FBpp0078007,FBpp0083975,FBpp0087926,FBpp0111762,FBpp0111818,FBpp0301099,FBpp0304479,FBpp0306056	Atg6,Fer1HCH,Rab5,Sec23,Snmp1,Syx7,TER94,alphaSnap,ctp,drosha,hid,msk,mys,rept,sno,zip
GO:0032456	endocytic recycling	4	32	0.0027	FBpp0077208,FBpp0084351,FBpp0085888,FBpp0305729	Exo84,Rab35,Sec5,Sec6
GO:0030036	actin cytoskeleton organization	9	223	0.0029	FBpp0070672,FBpp0071061,FBpp0072306,FBpp0074298,FBpp0076487,FBpp0078326,FBpp0084351,FBpp0304475,FBpp0305866	Exo84,Sec8,cher,ctp,mys,pbl,shi,wupA,zip
GO:0048732	gland development	8	176	0.0029	FBpp0070672,FBpp0071061,FBpp0072306,FBpp0074756,FBpp0074899,FBpp0085063,FBpp0087926,FBpp0305866	ctp,drosha,hid,mys,rept,shi,zfh1,zip
GO:0050767	regulation of neurogenesis	9	223	0.0029	FBpp0070672,FBpp0073173,FBpp0073572,FBpp0076487,FBpp0082682,FBpp0083434,FBpp0087921,FBpp0301099,FBpp0302752	Akt1,Bap60,Cul1,Rop,Rpd3,Sec23,ctp,pbl,slmb
GO:1904801	positive regulation of neuron remodeling	3	13	0.003	FBpp0070672,FBpp0083434,FBpp0087921	Cul1,ctp,slmb
GO:0006897	endocytosis	8	178	0.0031	FBpp0073966,FBpp0077473,FBpp0083502,FBpp0083646,FBpp0083975,FBpp0086382,FBpp0088945,FBpp0305866	AP-2alpha,AP-2mu,AP-2sigma,Atg6,Chc,Rab5,shark,shi
GO:0016197	endosomal transport	6	96	0.0031	FBpp0077208,FBpp0077473,FBpp0079999,FBpp0084351,FBpp0085888,FBpp0305729	Exo84,Rab35,Rab5,Sec5,Sec6,Vha68-2
GO:0045214	sarcomere organization	4	34	0.0032	FBpp0071061,FBpp0072306,FBpp0074298,FBpp0304475	cher,mys,wupA,zip
GO:0035295	tube development	17	691	0.0033	FBpp0070402,FBpp0070672,FBpp0071061,FBpp0072306,FBpp0074609,FBpp0074756,FBpp0074899,FBpp0076408,FBpp0076487,FBpp0077208,FBpp0077473,FBpp0079999,FBpp0082137,FBpp0089084,FBpp0111762,FBpp0292260,FBpp0301099	Rab5,Sec23,Sec5,Slh,Syx1A,Vha68-2,alphaSnap,crn,ctp,hid,mbo,msk,mys,pbl,rept,sno,zip
GO:0001927	exocyst assembly	2	2	0.0036	FBpp0077208,FBpp0084351	Exo84,Sec5
GO:0046826	negative regulation of protein export from nucleus	2	2	0.0036	FBpp0071905,FBpp0082137	Nup214,mbo
GO:0006139	nucleobase-containing compound metabolic process	29	1559	0.0037	FBpp0070402,FBpp0071562,FBpp0071848,FBpp0073828,FBpp0076287,FBpp0077134,FBpp0077251,FBpp0078013,FBpp0079648,FBpp0079874,FBpp0079999,FBpp0080121,FBpp0080138,FBpp0080622,FBpp0081156,FBpp0081484,FBpp0082139,FBpp0082516,FBpp0082817,FBpp0084021,FBpp0084144,FBpp0084726,FBpp0085619,FBpp0085902,FBpp0086853,FBpp0087756,FBpp0087926,FBpp0294043,FBpp0305561	AGO1,CG10333,CG11920,CG11985,CG12264,CG16941,CG33123,CG4038,CG5660,CG5706,CG6227,Cdc27,Cdk12,Cdk9,Cpsf100,Dp,FANCI,HP6,Hsc70-4,PCNA,Prp19,Ref1,RnrL,RpII33,Smg5,Vha55,Vha68-2,crn,drosha
GO:0031323	regulation of cellular metabolic process	33	1876	0.0038	FBpp0070402,FBpp0071848,FBpp0073173,FBpp0073572,FBpp0074756,FBpp0074899,FBpp0076806,FBpp0077134,FBpp0077399,FBpp0077941,FBpp0078013,FBpp0078318,FBpp0079648,FBpp0079677,FBpp0079680,FBpp0080138,FBpp0080685,FBpp0082516,FBpp0082682,FBpp0082743,FBpp0083434,FBpp0085063,FBpp0085295,FBpp0085619,FBpp0085902,FBpp0086705,FBpp0086853,FBpp0087921,FBpp0111762,FBpp0111818,FBpp0294043,FBpp0303869,FBpp0305866	AGO1,Akt1,Bap60,CG2051,CG6094,CSN5,Cdk12,Cdk9,Cul1,CycK,Dp,HP6,Hsc70-4,PCNA,Prp19,RnrL,Rpd3,Side,Smg5,TER94,Tango7,Trn-SR,alien,chico,crn,hid,kni,rept,scny,shi,slmb,sno,zfh1
GO:0022613	ribonucleoprotein complex biogenesis	10	287	0.0042	FBpp0070402,FBpp0071562,FBpp0072908,FBpp0074756,FBpp0079278,FBpp0082137,FBpp0082817,FBpp0084144,FBpp0085902,FBpp0294043	AGO1,CG11920,CG16941,CG17737,CG4038,Prp19,crn,emb,mbo,rept
GO:0032434	regulation of proteasomal ubiquitin-dependent protein catabolic process	4	37	0.0042	FBpp0082743,FBpp0083434,FBpp0087921,FBpp0111818	CSN5,Cul1,TER94,slmb
GO:0003002	regionalization	13	461	0.0045	FBpp0072306,FBpp0073173,FBpp0073966,FBpp0076408,FBpp0077473,FBpp0077941,FBpp0082743,FBpp0083434,FBpp0086853,FBpp0089084,FBpp0111762,FBpp0294043,FBpp0301099	AGO1,CSN5,Chc,Dp,Rab5,Rpd3,Sec23,Slh,kni,msk,slmb,sno,zip
GO:0006906	vesicle fusion	4	38	0.0045	FBpp0074609,FBpp0077473,FBpp0078007,FBpp0292260	Rab5,Syx1A,Syx7,alphaSnap
GO:0007286	spermatid development	6	104	0.0045	FBpp0070672,FBpp0073966,FBpp0078326,FBpp0084351,FBpp0086705,FBpp0305866	Chc,Exo84,Sec8,Tango7,ctp,shi
GO:0007435	salivary gland morphogenesis	6	104	0.0045	FBpp0070672,FBpp0072306,FBpp0074756,FBpp0074899,FBpp0087926,FBpp0305866	ctp,drosha,hid,rept,shi,zip
GO:0035070	salivary gland histolysis	4	38	0.0045	FBpp0070672,FBpp0074756,FBpp0074899,FBpp0087926	ctp,drosha,hid,rept
GO:0060562	epithelial tube morphogenesis	13	460	0.0045	FBpp0070402,FBpp0070672,FBpp0071061,FBpp0072306,FBpp0074609,FBpp0074756,FBpp0074899,FBpp0076408,FBpp0076487,FBpp0077208,FBpp0077473,FBpp0082137,FBpp0111762	Rab5,Sec5,alphaSnap,crn,ctp,hid,mbo,msk,mys,pbl,rept,sno,zip
GO:0090087	regulation of peptide transport	5	68	0.0045	FBpp0071905,FBpp0072616,FBpp0079278,FBpp0082137,FBpp0082682	Akt1,Klp61F,Nup214,emb,mbo
GO:0008356	asymmetric cell division	6	105	0.0046	FBpp0072306,FBpp0074841,FBpp0079677,FBpp0082743,FBpp0088945,FBpp0303869	AP-2alpha,CSN1b,CSN5,alien,chico,zip
GO:0006893	Golgi to plasma membrane transport	3	16	0.0047	FBpp0077208,FBpp0078326,FBpp0085888	Sec5,Sec6,Sec8
GO:0007110	meiosis I cytokinesis	3	16	0.0047	FBpp0076487,FBpp0078326,FBpp0084351	Exo84,Sec8,pbl
GO:0043065	positive regulation of apoptotic process	5	69	0.0047	FBpp0074899,FBpp0079648,FBpp0086705,FBpp0086853,FBpp0111818	Dp,RnrL,TER94,Tango7,hid
GO:0070925	organelle assembly	11	349	0.0047	FBpp0070672,FBpp0071061,FBpp0072306,FBpp0072616,FBpp0074298,FBpp0074822,FBpp0076487,FBpp0079278,FBpp0083975,FBpp0084900,FBpp0304475	Atg3,Atg6,Klp61F,cher,ctp,emb,mys,ncd,pbl,wupA,zip
GO:0006950	response to stress	22	1067	0.0049	FBpp0070457,FBpp0071848,FBpp0072306,FBpp0072908,FBpp0074822,FBpp0074899,FBpp0077208,FBpp0077251,FBpp0079648,FBpp0079677,FBpp0080121,FBpp0082516,FBpp0082682,FBpp0083975,FBpp0085619,FBpp0085902,FBpp0086382,FBpp0086853,FBpp0087756,FBpp0089084,FBpp0290803,FBpp0300511	Akt1,Atg3,Atg6,CG17737,CG33123,Cdk9,Dop1R1,Dp,FANCI,Hsc70-4,PCNA,Prp19,RnrL,RpII33,SNF4Agamma,Sec5,Slh,chico,eIF2B-beta,hid,shark,zip
GO:0007088	regulation of mitotic nuclear division	5	70	0.0049	FBpp0077941,FBpp0083434,FBpp0084831,FBpp0084900,FBpp0293235	Bub3,Nup358,kni,ncd,slmb
GO:0044265	cellular macromolecule catabolic process	12	409	0.005	FBpp0073893,FBpp0076806,FBpp0078664,FBpp0080138,FBpp0083434,FBpp0086603,FBpp0087926,FBpp0089041,FBpp0111818,FBpp0293235,FBpp0294043,FBpp0305561	AGO1,Cdc27,Nup358,Prosalpha7,Rpn11,Rpn6,Smg5,TER94,drosha,scny,shtd,slmb
GO:0031330	negative regulation of cellular catabolic process	4	40	0.0051	FBpp0076806,FBpp0079677,FBpp0082682,FBpp0082743	Akt1,CSN5,chico,scny
GO:0044248	cellular catabolic process	17	727	0.0053	FBpp0070672,FBpp0073893,FBpp0074822,FBpp0076806,FBpp0078664,FBpp0080138,FBpp0082516,FBpp0083434,FBpp0083975,FBpp0086603,FBpp0087926,FBpp0089041,FBpp0111818,FBpp0290803,FBpp0293235,FBpp0294043,FBpp0305561	AGO1,Atg3,Atg6,Cdc27,Hsc70-4,Nup358,Prosalpha7,Rpn11,Rpn6,SNF4Agamma,Smg5,TER94,ctp,drosha,scny,shtd,slmb
GO:0000056	ribosomal small subunit export from nucleus	2	3	0.0054	FBpp0079278,FBpp0082137	emb,mbo
GO:0006342	chromatin silencing	5	72	0.0054	FBpp0073173,FBpp0074756,FBpp0078318,FBpp0082516,FBpp0294043	AGO1,CG2051,Hsc70-4,Rpd3,rept
GO:0006438	valyl-tRNA aminoacylation	2	3	0.0054	FBpp0076287,FBpp0077251	CG33123,CG5660
GO:0031667	response to nutrient levels	7	152	0.0054	FBpp0074822,FBpp0074899,FBpp0079677,FBpp0083975,FBpp0290803,FBpp0300511,FBpp0305866	Atg3,Atg6,Dop1R1,SNF4Agamma,chico,hid,shi
GO:0035494	SNARE complex disassembly	2	3	0.0054	FBpp0074609,FBpp0082346	Nsf2,alphaSnap
GO:0051012	microtubule sliding	2	3	0.0054	FBpp0072616,FBpp0084900	Klp61F,ncd
GO:1903475	mitotic actomyosin contractile ring assembly	2	3	0.0054	FBpp0076487,FBpp0305866	pbl,shi
GO:0009267	cellular response to starvation	5	73	0.0055	FBpp0074822,FBpp0074899,FBpp0079677,FBpp0083975,FBpp0290803	Atg3,Atg6,SNF4Agamma,chico,hid
GO:0035088	establishment or maintenance of apical/basal cell polarity	4	42	0.0058	FBpp0077473,FBpp0078007,FBpp0084351,FBpp0086382	Exo84,Rab5,Syx7,shark
GO:0016082	synaptic vesicle priming	3	18	0.0059	FBpp0074609,FBpp0082346,FBpp0302752	Nsf2,Rop,alphaSnap
GO:0007306	eggshell chorion assembly	5	77	0.0067	FBpp0083434,FBpp0085619,FBpp0086382,FBpp0086853,FBpp0305866	Dp,PCNA,shark,shi,slmb
GO:0032007	negative regulation of TOR signaling	3	19	0.0067	FBpp0082682,FBpp0083434,FBpp0087921	Akt1,Cul1,slmb
GO:0009056	catabolic process	18	817	0.0068	FBpp0070672,FBpp0073893,FBpp0074822,FBpp0076806,FBpp0078664,FBpp0080138,FBpp0082516,FBpp0083434,FBpp0083975,FBpp0086603,FBpp0087921,FBpp0087926,FBpp0089041,FBpp0111818,FBpp0290803,FBpp0293235,FBpp0294043,FBpp0305561	AGO1,Atg3,Atg6,Cdc27,Cul1,Hsc70-4,Nup358,Prosalpha7,Rpn11,Rpn6,SNF4Agamma,Smg5,TER94,ctp,drosha,scny,shtd,slmb
GO:0006511	ubiquitin-dependent protein catabolic process	9	261	0.0071	FBpp0073893,FBpp0076806,FBpp0078664,FBpp0083434,FBpp0086603,FBpp0089041,FBpp0111818,FBpp0293235,FBpp0305561	Cdc27,Nup358,Prosalpha7,Rpn11,Rpn6,TER94,scny,shtd,slmb
GO:0030163	protein catabolic process	10	315	0.0071	FBpp0073893,FBpp0076806,FBpp0078664,FBpp0083434,FBpp0086603,FBpp0087921,FBpp0089041,FBpp0111818,FBpp0293235,FBpp0305561	Cdc27,Cul1,Nup358,Prosalpha7,Rpn11,Rpn6,TER94,scny,shtd,slmb
GO:0051345	positive regulation of hydrolase activity	7	162	0.0072	FBpp0070672,FBpp0074609,FBpp0074899,FBpp0076487,FBpp0079648,FBpp0086705,FBpp0301099	RnrL,Sec23,Tango7,alphaSnap,ctp,hid,pbl
GO:0001745	compound eye morphogenesis	9	264	0.0074	FBpp0072306,FBpp0073966,FBpp0074609,FBpp0074899,FBpp0076408,FBpp0082743,FBpp0085888,FBpp0086941,FBpp0305866	Amph,CSN5,Chc,Sec6,alphaSnap,hid,msk,shi,zip
GO:0006890	retrograde vesicle-mediated transport, Golgi to endoplasmic reticulum	3	20	0.0074	FBpp0080048,FBpp0084050,FBpp0089084	Slh,Syx18,beta'COP
GO:0010897	negative regulation of triglyceride catabolic process	2	4	0.0074	FBpp0079677,FBpp0082682	Akt1,chico
GO:0030011	maintenance of cell polarity	3	20	0.0074	FBpp0084351,FBpp0086382,FBpp0301099	Exo84,Sec23,shark
GO:0034058	endosomal vesicle fusion	2	4	0.0074	FBpp0077473,FBpp0078007	Rab5,Syx7
GO:0048227	plasma membrane to endosome transport	2	4	0.0074	FBpp0077473,FBpp0078007	Rab5,Syx7
GO:0051171	regulation of nitrogen compound metabolic process	31	1808	0.0074	FBpp0070402,FBpp0071848,FBpp0073173,FBpp0073572,FBpp0074756,FBpp0074899,FBpp0076806,FBpp0077134,FBpp0077399,FBpp0077941,FBpp0078013,FBpp0078318,FBpp0079648,FBpp0079680,FBpp0080138,FBpp0080685,FBpp0082516,FBpp0082743,FBpp0083434,FBpp0085063,FBpp0085295,FBpp0085619,FBpp0085902,FBpp0086705,FBpp0086853,FBpp0087921,FBpp0111762,FBpp0111818,FBpp0294043,FBpp0303869,FBpp0305866	AGO1,Bap60,CG2051,CG6094,CSN5,Cdk12,Cdk9,Cul1,CycK,Dp,HP6,Hsc70-4,PCNA,Prp19,RnrL,Rpd3,Side,Smg5,TER94,Tango7,Trn-SR,alien,crn,hid,kni,rept,scny,shi,slmb,sno,zfh1
GO:2001272	positive regulation of cysteine-type endopeptidase activity involved in execution phase of apoptosis	2	4	0.0074	FBpp0074899,FBpp0086705	Tango7,hid
GO:1903364	positive regulation of cellular protein catabolic process	4	47	0.0079	FBpp0082743,FBpp0083434,FBpp0087921,FBpp0111818	CSN5,Cul1,TER94,slmb
GO:0048707	instar larval or pupal morphogenesis	12	440	0.008	FBpp0070672,FBpp0071061,FBpp0072306,FBpp0074609,FBpp0074756,FBpp0074899,FBpp0076408,FBpp0077473,FBpp0083975,FBpp0087926,FBpp0111762,FBpp0111818	Atg6,Rab5,TER94,alphaSnap,ctp,drosha,hid,msk,mys,rept,sno,zip
GO:0007030	Golgi organization	5	82	0.0082	FBpp0072616,FBpp0082568,FBpp0086705,FBpp0111818,FBpp0301099	Klp61F,Sec23,TER94,Tango7,ldlCp
GO:0051028	mRNA transport	4	48	0.0084	FBpp0073659,FBpp0080138,FBpp0082137,FBpp0084900	Nup93-1,Smg5,mbo,ncd
GO:0009892	negative regulation of metabolic process	17	774	0.009	FBpp0073173,FBpp0074756,FBpp0076806,FBpp0077134,FBpp0077208,FBpp0077941,FBpp0078318,FBpp0079677,FBpp0080138,FBpp0082516,FBpp0082682,FBpp0082743,FBpp0085063,FBpp0087926,FBpp0294043,FBpp0303869,FBpp0305866	AGO1,Akt1,CG2051,CSN5,HP6,Hsc70-4,Rpd3,Sec5,Smg5,alien,chico,drosha,kni,rept,scny,shi,zfh1
GO:0007291	sperm individualization	4	50	0.0095	FBpp0070672,FBpp0073966,FBpp0086705,FBpp0305866	Chc,Tango7,ctp,shi
GO:0016458	gene silencing	6	127	0.0096	FBpp0073173,FBpp0074756,FBpp0078318,FBpp0082516,FBpp0087926,FBpp0294043	AGO1,CG2051,Hsc70-4,Rpd3,drosha,rept
GO:0008285	negative regulation of cell population proliferation	5	86	0.0097	FBpp0073572,FBpp0077473,FBpp0078007,FBpp0082743,FBpp0083434	Bap60,CSN5,Rab5,Syx7,slmb
GO:0046833	positive regulation of RNA export from nucleus	2	5	0.0097	FBpp0071905,FBpp0293235	Nup214,Nup358
GO:0051601	exocyst localization	2	5	0.0097	FBpp0084351,FBpp0085888	Exo84,Sec6
GO:0070816	phosphorylation of RNA polymerase II C-terminal domain	2	5	0.0097	FBpp0071848,FBpp0078013	Cdk12,Cdk9
GO:0090435	protein localization to nuclear envelope	2	5	0.0097	FBpp0071905,FBpp0073659	Nup214,Nup93-1
GO:0006891	intra-Golgi vesicle-mediated transport	3	23	0.0098	FBpp0074609,FBpp0080048,FBpp0082568	alphaSnap,beta'COP,ldlCp
GO:0010468	regulation of gene expression	26	1451	0.0098	FBpp0070402,FBpp0071848,FBpp0073173,FBpp0073572,FBpp0074756,FBpp0076806,FBpp0077134,FBpp0077208,FBpp0077399,FBpp0077941,FBpp0078013,FBpp0078318,FBpp0079680,FBpp0080138,FBpp0080685,FBpp0081484,FBpp0082516,FBpp0085063,FBpp0085295,FBpp0085902,FBpp0086853,FBpp0087926,FBpp0111762,FBpp0293235,FBpp0294043,FBpp0303869	AGO1,Bap60,CG11985,CG2051,CG6094,Cdk12,Cdk9,CycK,Dp,HP6,Hsc70-4,Nup358,Prp19,Rpd3,Sec5,Side,Smg5,Trn-SR,alien,crn,drosha,kni,rept,scny,sno,zfh1
GO:0035151	regulation of tube size, open tracheal system	4	51	0.0098	FBpp0072306,FBpp0073966,FBpp0077941,FBpp0079677	Chc,chico,kni,zip
GO:0048737	imaginal disc-derived appendage development	10	335	0.0098	FBpp0070672,FBpp0071061,FBpp0072306,FBpp0074609,FBpp0074756,FBpp0074899,FBpp0076408,FBpp0077473,FBpp0111762,FBpp0292260	Rab5,Syx1A,alphaSnap,ctp,hid,msk,mys,rept,sno,zip
GO:0009887	animal organ morphogenesis	16	720	0.0104	FBpp0070672,FBpp0071061,FBpp0072306,FBpp0073966,FBpp0074609,FBpp0074756,FBpp0074899,FBpp0076408,FBpp0077473,FBpp0082346,FBpp0082743,FBpp0085888,FBpp0086941,FBpp0087926,FBpp0111762,FBpp0305866	Amph,CSN5,Chc,Nsf2,Rab5,Sec6,alphaSnap,ctp,drosha,hid,msk,mys,rept,shi,sno,zip
GO:0010638	positive regulation of organelle organization	6	131	0.0107	FBpp0073572,FBpp0076806,FBpp0077208,FBpp0293235,FBpp0304475,FBpp0305866	Bap60,Nup358,Sec5,cher,scny,shi
GO:0001700	embryonic development via the syncytial blastoderm	7	179	0.011	FBpp0071061,FBpp0072306,FBpp0074899,FBpp0077473,FBpp0082516,FBpp0085063,FBpp0086382	Hsc70-4,Rab5,hid,mys,shark,zfh1,zip
GO:0060538	skeletal muscle organ development	4	53	0.011	FBpp0071061,FBpp0074298,FBpp0076408,FBpp0301099	Sec23,msk,mys,wupA
GO:0090066	regulation of anatomical structure size	8	230	0.011	FBpp0072306,FBpp0073659,FBpp0073966,FBpp0076487,FBpp0077941,FBpp0079677,FBpp0082682,FBpp0305866	Akt1,Chc,Nup93-1,chico,kni,pbl,shi,zip
GO:0031331	positive regulation of cellular catabolic process	5	90	0.0112	FBpp0074899,FBpp0082743,FBpp0083434,FBpp0087921,FBpp0111818	CSN5,Cul1,TER94,hid,slmb
GO:0022618	ribonucleoprotein complex assembly	6	133	0.0114	FBpp0070402,FBpp0072908,FBpp0074756,FBpp0082817,FBpp0085902,FBpp0294043	AGO1,CG16941,CG17737,Prp19,crn,rept
GO:0002682	regulation of immune system process	7	181	0.0116	FBpp0071848,FBpp0076806,FBpp0079677,FBpp0080622,FBpp0082682,FBpp0082743,FBpp0304475	Akt1,CG10333,CSN5,Cdk9,cher,chico,scny
GO:0048749	compound eye development	10	344	0.0116	FBpp0072306,FBpp0073893,FBpp0073966,FBpp0074609,FBpp0074899,FBpp0076408,FBpp0082743,FBpp0085888,FBpp0086941,FBpp0305866	Amph,CSN5,Chc,Sec6,alphaSnap,hid,msk,shi,shtd,zip
GO:0007317	regulation of pole plasm oskar mRNA localization	3	25	0.0117	FBpp0111818,FBpp0292260,FBpp0302752	Rop,Syx1A,TER94
GO:0007552	metamorphosis	12	467	0.0117	FBpp0070672,FBpp0071061,FBpp0072306,FBpp0074609,FBpp0074756,FBpp0074899,FBpp0076408,FBpp0077473,FBpp0083975,FBpp0087926,FBpp0111762,FBpp0111818	Atg6,Rab5,TER94,alphaSnap,ctp,drosha,hid,msk,mys,rept,sno,zip
GO:0035096	larval midgut cell programmed cell death	3	25	0.0117	FBpp0074899,FBpp0083975,FBpp0111818	Atg6,TER94,hid
GO:0071310	cellular response to organic substance	8	233	0.0117	FBpp0079677,FBpp0082516,FBpp0082682,FBpp0087926,FBpp0293235,FBpp0294043,FBpp0300511,FBpp0306056	AGO1,Akt1,Dop1R1,Hsc70-4,Nup358,Snmp1,chico,drosha
GO:0060628	regulation of ER to Golgi vesicle-mediated transport	2	6	0.0118	FBpp0089084,FBpp0301099	Sec23,Slh
GO:0061883	clathrin-dependent endocytosis involved in vitellogenesis	2	6	0.0118	FBpp0077473,FBpp0305866	Rab5,shi
GO:0070887	cellular response to chemical stimulus	10	346	0.0118	FBpp0070457,FBpp0072908,FBpp0079677,FBpp0082516,FBpp0082682,FBpp0087926,FBpp0293235,FBpp0294043,FBpp0300511,FBpp0306056	AGO1,Akt1,CG17737,Dop1R1,Hsc70-4,Nup358,Snmp1,chico,drosha,eIF2B-beta
GO:0090209	negative regulation of triglyceride metabolic process	2	6	0.0118	FBpp0079677,FBpp0082682	Akt1,chico
GO:0071426	ribonucleoprotein complex export from nucleus	4	55	0.0119	FBpp0073659,FBpp0079278,FBpp0080138,FBpp0082137	Nup93-1,Smg5,emb,mbo
GO:0042594	response to starvation	6	136	0.012	FBpp0074822,FBpp0074899,FBpp0079677,FBpp0083975,FBpp0290803,FBpp0300511	Atg3,Atg6,Dop1R1,SNF4Agamma,chico,hid
GO:0033227	dsRNA transport	3	26	0.0124	FBpp0073966,FBpp0082568,FBpp0083646	AP-2mu,Chc,ldlCp
GO:0051493	regulation of cytoskeleton organization	6	139	0.0132	FBpp0071061,FBpp0083434,FBpp0084900,FBpp0293235,FBpp0304475,FBpp0305866	Nup358,cher,mys,ncd,shi,slmb
GO:0040029	regulation of gene expression, epigenetic	6	140	0.0135	FBpp0073173,FBpp0074756,FBpp0078318,FBpp0082516,FBpp0087926,FBpp0294043	AGO1,CG2051,Hsc70-4,Rpd3,drosha,rept
GO:0043280	positive regulation of cysteine-type endopeptidase activity involved in apoptotic process	3	27	0.0135	FBpp0074899,FBpp0079648,FBpp0086705	RnrL,Tango7,hid
GO:0048167	regulation of synaptic plasticity	3	27	0.0135	FBpp0079677,FBpp0082682,FBpp0305866	Akt1,chico,shi
GO:0007274	neuromuscular synaptic transmission	4	58	0.0137	FBpp0074609,FBpp0082346,FBpp0084050,FBpp0292260	Nsf2,Syx18,Syx1A,alphaSnap
GO:0000055	ribosomal large subunit export from nucleus	2	7	0.0143	FBpp0079278,FBpp0082137	emb,mbo
GO:0007100	mitotic centrosome separation	2	7	0.0143	FBpp0072616,FBpp0084900	Klp61F,ncd
GO:0045313	rhabdomere membrane biogenesis	2	7	0.0143	FBpp0085888,FBpp0086941	Amph,Sec6
GO:0048878	chemical homeostasis	8	244	0.0143	FBpp0079677,FBpp0079999,FBpp0082139,FBpp0082682,FBpp0290803,FBpp0300511,FBpp0304479,FBpp0306056	Akt1,Dop1R1,Fer1HCH,SNF4Agamma,Snmp1,Vha55,Vha68-2,chico
GO:0072697	protein localization to cell cortex	2	7	0.0143	FBpp0077208,FBpp0085888	Sec5,Sec6
GO:0010975	regulation of neuron projection development	5	98	0.0144	FBpp0073173,FBpp0076487,FBpp0082682,FBpp0301099,FBpp0302752	Akt1,Rop,Rpd3,Sec23,pbl
GO:0033044	regulation of chromosome organization	6	144	0.015	FBpp0073173,FBpp0073572,FBpp0076806,FBpp0083434,FBpp0084831,FBpp0084900	Bap60,Bub3,Rpd3,ncd,scny,slmb
GO:0051223	regulation of protein transport	4	60	0.015	FBpp0071905,FBpp0072616,FBpp0079278,FBpp0082137	Klp61F,Nup214,emb,mbo
GO:1901564	organonitrogen compound metabolic process	42	2860	0.015	FBpp0070430,FBpp0070457,FBpp0071848,FBpp0072908,FBpp0073173,FBpp0073893,FBpp0074756,FBpp0074841,FBpp0076287,FBpp0076806,FBpp0077251,FBpp0077473,FBpp0078013,FBpp0078318,FBpp0078664,FBpp0079680,FBpp0079999,FBpp0082139,FBpp0082682,FBpp0082743,FBpp0082994,FBpp0083434,FBpp0083658,FBpp0084021,FBpp0085658,FBpp0085902,FBpp0086382,FBpp0086603,FBpp0086705,FBpp0087921,FBpp0087958,FBpp0089041,FBpp0089217,FBp…	Akt1,CG10663,CG17737,CG2051,CG33123,CG3806,CG5660,CG5706,CG6094,CG8636,CG8728,CSN1b,CSN5,CSN6,Cdc27,Cdk12,Cdk9,Cul1,EF2,Elf,Nup358,Prosalpha7,Prp19,Rab5,Rep,Rpd3,Rpn11,Rpn6,TER94,Tango7,Vha55,Vha68-2,alien,eIF-1A,eIF2B-beta,eIF5B,eRF1,rept,scny,shark,shtd,slmb
GO:0035556	intracellular signal transduction	10	366	0.0158	FBpp0074899,FBpp0077473,FBpp0079677,FBpp0082682,FBpp0085658,FBpp0086382,FBpp0086853,FBpp0300511,FBpp0300628,FBpp0305729	Akt1,Cngl,Dop1R1,Dp,Rab35,Rab5,Rep,chico,hid,shark
GO:0031175	neuron projection development	11	429	0.0161	FBpp0071061,FBpp0073173,FBpp0074899,FBpp0076487,FBpp0077473,FBpp0082516,FBpp0082682,FBpp0082743,FBpp0085063,FBpp0111818,FBpp0304475	Akt1,CSN5,Hsc70-4,Rab5,Rpd3,TER94,cher,hid,mys,pbl,zfh1
GO:0016246	RNA interference	3	30	0.0166	FBpp0082516,FBpp0087926,FBpp0294043	AGO1,Hsc70-4,drosha
GO:0045807	positive regulation of endocytosis	3	30	0.0166	FBpp0073966,FBpp0078007,FBpp0088945	AP-2alpha,Chc,Syx7
GO:0009605	response to external stimulus	17	842	0.0167	FBpp0071061,FBpp0072306,FBpp0073173,FBpp0074822,FBpp0074899,FBpp0079677,FBpp0082137,FBpp0082516,FBpp0083975,FBpp0085063,FBpp0085619,FBpp0111818,FBpp0290803,FBpp0300511,FBpp0304475,FBpp0304479,FBpp0305866	Atg3,Atg6,Dop1R1,Fer1HCH,Hsc70-4,PCNA,Rpd3,SNF4Agamma,TER94,cher,chico,hid,mbo,mys,shi,zfh1,zip
GO:0031629	synaptic vesicle fusion to presynaptic active zone membrane	2	8	0.0167	FBpp0074609,FBpp0292260	Syx1A,alphaSnap
GO:0036293	response to decreased oxygen levels	4	63	0.0167	FBpp0070457,FBpp0072908,FBpp0079677,FBpp0089084	CG17737,Slh,chico,eIF2B-beta
GO:0045026	plasma membrane fusion	2	8	0.0167	FBpp0074609,FBpp0292260	Syx1A,alphaSnap
GO:0045199	maintenance of epithelial cell apical/basal polarity	2	8	0.0167	FBpp0084351,FBpp0086382	Exo84,shark
GO:0046664	dorsal closure, amnioserosa morphology change	2	8	0.0167	FBpp0072306,FBpp0077473	Rab5,zip
GO:0051146	striated muscle cell differentiation	5	104	0.0172	FBpp0071061,FBpp0072306,FBpp0074298,FBpp0082682,FBpp0304475	Akt1,cher,mys,wupA,zip
GO:0032436	positive regulation of proteasomal ubiquitin-dependent protein catabolic process	3	31	0.0176	FBpp0083434,FBpp0087921,FBpp0111818	Cul1,TER94,slmb
GO:0030162	regulation of proteolysis	7	204	0.0185	FBpp0074899,FBpp0079648,FBpp0082743,FBpp0083434,FBpp0086705,FBpp0087921,FBpp0111818	CSN5,Cul1,RnrL,TER94,Tango7,hid,slmb
GO:0043062	extracellular structure organization	4	65	0.0185	FBpp0073966,FBpp0301099,FBpp0304475,FBpp0305866	Chc,Sec23,cher,shi
GO:0045787	positive regulation of cell cycle	4	65	0.0185	FBpp0082743,FBpp0085295,FBpp0290803,FBpp0293235	CSN5,CycK,Nup358,SNF4Agamma
GO:0009994	oocyte differentiation	6	153	0.0186	FBpp0073966,FBpp0077208,FBpp0082743,FBpp0083434,FBpp0087926,FBpp0294043	AGO1,CSN5,Chc,Sec5,drosha,slmb
GO:0035071	salivary gland cell autophagic cell death	3	32	0.0189	FBpp0070672,FBpp0074756,FBpp0074899	ctp,hid,rept
GO:0043085	positive regulation of catalytic activity	8	260	0.0189	FBpp0070672,FBpp0074609,FBpp0074899,FBpp0076487,FBpp0079648,FBpp0085295,FBpp0086705,FBpp0301099	CycK,RnrL,Sec23,Tango7,alphaSnap,ctp,hid,pbl
GO:0043001	Golgi to plasma membrane protein transport	2	9	0.0196	FBpp0077208,FBpp0085888	Sec5,Sec6
GO:0031324	negative regulation of cellular metabolic process	14	645	0.0197	FBpp0073173,FBpp0074756,FBpp0076806,FBpp0077134,FBpp0077941,FBpp0078318,FBpp0079677,FBpp0082516,FBpp0082682,FBpp0082743,FBpp0085063,FBpp0294043,FBpp0303869,FBpp0305866	AGO1,Akt1,CG2051,CSN5,HP6,Hsc70-4,Rpd3,alien,chico,kni,rept,scny,shi,zfh1
GO:0000902	cell morphogenesis	12	513	0.0205	FBpp0071061,FBpp0073173,FBpp0074899,FBpp0077473,FBpp0082516,FBpp0082743,FBpp0083434,FBpp0085063,FBpp0086382,FBpp0089084,FBpp0111818,FBpp0304475	CSN5,Hsc70-4,Rab5,Rpd3,Slh,TER94,cher,hid,mys,shark,slmb,zfh1
GO:0007612	learning	4	69	0.0217	FBpp0079677,FBpp0294043,FBpp0300511,FBpp0305866	AGO1,Dop1R1,chico,shi
GO:0010629	negative regulation of gene expression	12	517	0.0217	FBpp0073173,FBpp0074756,FBpp0077134,FBpp0077208,FBpp0077941,FBpp0078318,FBpp0080138,FBpp0082516,FBpp0085063,FBpp0087926,FBpp0294043,FBpp0303869	AGO1,CG2051,HP6,Hsc70-4,Rpd3,Sec5,Smg5,alien,drosha,kni,rept,zfh1
GO:0045892	negative regulation of transcription, DNA-templated	9	326	0.0217	FBpp0073173,FBpp0074756,FBpp0077134,FBpp0077941,FBpp0078318,FBpp0082516,FBpp0085063,FBpp0294043,FBpp0303869	AGO1,CG2051,HP6,Hsc70-4,Rpd3,alien,kni,rept,zfh1
GO:0035114	imaginal disc-derived appendage morphogenesis	9	328	0.0222	FBpp0070672,FBpp0071061,FBpp0072306,FBpp0074609,FBpp0074756,FBpp0074899,FBpp0076408,FBpp0077473,FBpp0111762	Rab5,alphaSnap,ctp,hid,msk,mys,rept,sno,zip
GO:0045596	negative regulation of cell differentiation	5	112	0.0222	FBpp0073173,FBpp0073572,FBpp0082743,FBpp0083434,FBpp0304475	Bap60,CSN5,Rpd3,cher,slmb
GO:0035204	negative regulation of lamellocyte differentiation	2	10	0.0226	FBpp0082743,FBpp0304475	CSN5,cher
GO:0045477	regulation of nurse cell apoptotic process	2	10	0.0226	FBpp0083434,FBpp0086853	Dp,slmb
GO:0090328	regulation of olfactory learning	2	10	0.0226	FBpp0294043,FBpp0300511	AGO1,Dop1R1
GO:0032270	positive regulation of cellular protein metabolic process	8	271	0.0227	FBpp0074899,FBpp0079648,FBpp0082743,FBpp0083434,FBpp0085295,FBpp0086705,FBpp0087921,FBpp0111818	CSN5,Cul1,CycK,RnrL,TER94,Tango7,hid,slmb
GO:0035159	regulation of tube length, open tracheal system	3	35	0.0227	FBpp0072306,FBpp0073966,FBpp0079677	Chc,chico,zip
GO:0051051	negative regulation of transport	3	35	0.0227	FBpp0071905,FBpp0082137,FBpp0082682	Akt1,Nup214,mbo
GO:0019219	regulation of nucleobase-containing compound metabolic process	22	1257	0.0228	FBpp0070402,FBpp0071848,FBpp0073173,FBpp0073572,FBpp0074756,FBpp0076806,FBpp0077134,FBpp0077399,FBpp0077941,FBpp0078013,FBpp0078318,FBpp0080138,FBpp0080685,FBpp0082516,FBpp0085063,FBpp0085295,FBpp0085619,FBpp0085902,FBpp0086853,FBpp0111762,FBpp0294043,FBpp0303869	AGO1,Bap60,CG2051,Cdk12,Cdk9,CycK,Dp,HP6,Hsc70-4,PCNA,Prp19,Rpd3,Side,Smg5,Trn-SR,alien,crn,kni,rept,scny,sno,zfh1
GO:0120036	plasma membrane bounded cell projection organization	13	592	0.0231	FBpp0070672,FBpp0071061,FBpp0072306,FBpp0073173,FBpp0074899,FBpp0076487,FBpp0077473,FBpp0082516,FBpp0082682,FBpp0082743,FBpp0085063,FBpp0111818,FBpp0304475	Akt1,CSN5,Hsc70-4,Rab5,Rpd3,TER94,cher,ctp,hid,mys,pbl,zfh1,zip
GO:0010604	positive regulation of macromolecule metabolic process	15	735	0.0238	FBpp0071848,FBpp0073572,FBpp0074756,FBpp0074899,FBpp0078013,FBpp0079648,FBpp0082743,FBpp0083434,FBpp0085295,FBpp0086705,FBpp0086853,FBpp0087921,FBpp0111762,FBpp0111818,FBpp0293235	Bap60,CSN5,Cdk12,Cdk9,Cul1,CycK,Dp,Nup358,RnrL,TER94,Tango7,hid,rept,slmb,sno
GO:0007423	sensory organ development	11	463	0.0246	FBpp0070672,FBpp0072306,FBpp0073893,FBpp0073966,FBpp0074609,FBpp0074899,FBpp0076408,FBpp0082743,FBpp0085888,FBpp0086941,FBpp0305866	Amph,CSN5,Chc,Sec6,alphaSnap,ctp,hid,msk,shi,shtd,zip
GO:0061061	muscle structure development	7	220	0.0252	FBpp0071061,FBpp0072306,FBpp0074298,FBpp0076408,FBpp0082682,FBpp0301099,FBpp0304475	Akt1,Sec23,cher,msk,mys,wupA,zip
GO:0000916	actomyosin contractile ring contraction	2	11	0.0253	FBpp0078326,FBpp0084351	Exo84,Sec8
GO:0007611	learning or memory	6	167	0.0253	FBpp0079677,FBpp0099728,FBpp0294043,FBpp0300511,FBpp0304475,FBpp0305866	AGO1,Dop1R1,cher,chico,fabp,shi
GO:0010976	positive regulation of neuron projection development	3	37	0.0253	FBpp0082682,FBpp0301099,FBpp0302752	Akt1,Rop,Sec23
GO:0061723	glycophagy	2	11	0.0253	FBpp0074822,FBpp0083975	Atg3,Atg6
GO:0007166	cell surface receptor signaling pathway	11	467	0.0255	FBpp0071061,FBpp0076408,FBpp0079677,FBpp0082682,FBpp0082994,FBpp0086382,FBpp0087248,FBpp0111762,FBpp0302596,FBpp0304202,FBpp0306056	Akt1,Cirl,Snmp1,Tsp47F,chico,eIF-1A,eRF1,msk,mys,shark,sno
GO:0008360	regulation of cell shape	4	74	0.0255	FBpp0071061,FBpp0076487,FBpp0086382,FBpp0301099	Sec23,mys,pbl,shark
GO:0043161	proteasome-mediated ubiquitin-dependent protein catabolic process	6	171	0.0276	FBpp0073893,FBpp0078664,FBpp0083434,FBpp0086603,FBpp0089041,FBpp0305561	Cdc27,Prosalpha7,Rpn11,Rpn6,shtd,slmb
GO:0072001	renal system development	4	76	0.0276	FBpp0070402,FBpp0072306,FBpp0076487,FBpp0085063	crn,pbl,zfh1,zip
GO:0000212	meiotic spindle organization	3	39	0.0281	FBpp0078326,FBpp0084351,FBpp0084900	Exo84,Sec8,ncd
GO:0006379	mRNA cleavage	2	12	0.0281	FBpp0084726,FBpp0294043	AGO1,Cpsf100
GO:0006406	mRNA export from nucleus	3	39	0.0281	FBpp0073659,FBpp0080138,FBpp0082137	Nup93-1,Smg5,mbo
GO:0010033	response to organic substance	11	476	0.0281	FBpp0074756,FBpp0074899,FBpp0079677,FBpp0082516,FBpp0082682,FBpp0087926,FBpp0293235,FBpp0294043,FBpp0300511,FBpp0304475,FBpp0306056	AGO1,Akt1,Dop1R1,Hsc70-4,Nup358,Snmp1,cher,chico,drosha,hid,rept
GO:0030422	production of siRNA involved in RNA interference	2	12	0.0281	FBpp0087926,FBpp0294043	AGO1,drosha
GO:0030708	germarium-derived female germ-line cyst encapsulation	2	12	0.0281	FBpp0083434,FBpp0304475	cher,slmb
GO:0051252	regulation of RNA metabolic process	21	1209	0.0281	FBpp0070402,FBpp0071848,FBpp0073173,FBpp0073572,FBpp0074756,FBpp0076806,FBpp0077134,FBpp0077399,FBpp0077941,FBpp0078013,FBpp0078318,FBpp0080138,FBpp0080685,FBpp0082516,FBpp0085063,FBpp0085295,FBpp0085902,FBpp0086853,FBpp0111762,FBpp0294043,FBpp0303869	AGO1,Bap60,CG2051,Cdk12,Cdk9,CycK,Dp,HP6,Hsc70-4,Prp19,Rpd3,Side,Smg5,Trn-SR,alien,crn,kni,rept,scny,sno,zfh1
GO:0051259	protein complex oligomerization	3	39	0.0281	FBpp0072306,FBpp0072616,FBpp0074609	Klp61F,alphaSnap,zip
GO:0006418	tRNA aminoacylation for protein translation	3	40	0.0292	FBpp0076287,FBpp0077251,FBpp0084021	CG33123,CG5660,CG5706
GO:0008355	olfactory learning	3	40	0.0292	FBpp0079677,FBpp0300511,FBpp0305866	Dop1R1,chico,shi
GO:1903530	regulation of secretion by cell	4	78	0.0292	FBpp0071431,FBpp0082682,FBpp0292260,FBpp0301099	Akt1,Rph,Sec23,Syx1A
GO:0007444	imaginal disc development	12	548	0.0295	FBpp0070672,FBpp0071061,FBpp0072306,FBpp0074609,FBpp0074756,FBpp0074899,FBpp0076408,FBpp0077473,FBpp0079999,FBpp0089084,FBpp0111762,FBpp0292260	Rab5,Slh,Syx1A,Vha68-2,alphaSnap,ctp,hid,msk,mys,rept,sno,zip
GO:0009628	response to abiotic stimulus	10	414	0.0295	FBpp0070457,FBpp0071848,FBpp0072306,FBpp0072908,FBpp0074899,FBpp0079677,FBpp0080121,FBpp0089084,FBpp0300511,FBpp0302752	CG17737,Cdk9,Dop1R1,Rop,RpII33,Slh,chico,eIF2B-beta,hid,zip
GO:0009725	response to hormone	5	124	0.0295	FBpp0074756,FBpp0074899,FBpp0079677,FBpp0082682,FBpp0293235	Akt1,Nup358,chico,hid,rept
GO:0050803	regulation of synapse structure or activity	6	175	0.0295	FBpp0071061,FBpp0077473,FBpp0078326,FBpp0082346,FBpp0082682,FBpp0305866	Akt1,Nsf2,Rab5,Sec8,mys,shi
GO:0051253	negative regulation of RNA metabolic process	9	351	0.0298	FBpp0073173,FBpp0074756,FBpp0077134,FBpp0077941,FBpp0078318,FBpp0082516,FBpp0085063,FBpp0294043,FBpp0303869	AGO1,CG2051,HP6,Hsc70-4,Rpd3,alien,kni,rept,zfh1
GO:0090501	RNA phosphodiester bond hydrolysis	4	79	0.03	FBpp0080138,FBpp0084726,FBpp0087926,FBpp0294043	AGO1,Cpsf100,Smg5,drosha
GO:1901699	cellular response to nitrogen compound	4	79	0.03	FBpp0079677,FBpp0082682,FBpp0087926,FBpp0294043	AGO1,Akt1,chico,drosha
GO:0006508	proteolysis	16	838	0.0304	FBpp0073893,FBpp0074841,FBpp0076806,FBpp0078664,FBpp0082743,FBpp0083434,FBpp0083658,FBpp0086603,FBpp0086705,FBpp0087958,FBpp0089041,FBpp0111818,FBpp0112080,FBpp0293235,FBpp0303869,FBpp0305561	CG10663,CG8728,CSN1b,CSN5,CSN6,Cdc27,Nup358,Prosalpha7,Rpn11,Rpn6,TER94,Tango7,alien,scny,shtd,slmb
GO:0016203	muscle attachment	3	41	0.0306	FBpp0071061,FBpp0076408,FBpp0301099	Sec23,msk,mys
GO:0002183	cytoplasmic translational initiation	2	13	0.031	FBpp0072908,FBpp0086705	CG17737,Tango7
GO:0005980	glycogen catabolic process	2	13	0.031	FBpp0074822,FBpp0083975	Atg3,Atg6
GO:0008630	intrinsic apoptotic signaling pathway in response to DNA damage	2	13	0.031	FBpp0074899,FBpp0086853	Dp,hid
GO:0035073	pupariation	2	13	0.031	FBpp0078007,FBpp0306056	Snmp1,Syx7
GO:0035196	production of miRNAs involved in gene silencing by miRNA	2	13	0.031	FBpp0087926,FBpp0294043	AGO1,drosha
GO:0042632	cholesterol homeostasis	2	13	0.031	FBpp0082682,FBpp0290803	Akt1,SNF4Agamma
GO:0043412	macromolecule modification	21	1225	0.031	FBpp0071562,FBpp0071848,FBpp0073173,FBpp0073893,FBpp0074756,FBpp0074841,FBpp0076806,FBpp0078013,FBpp0078318,FBpp0078664,FBpp0079874,FBpp0082682,FBpp0082743,FBpp0083434,FBpp0083658,FBpp0085658,FBpp0085902,FBpp0086382,FBpp0087921,FBpp0303869,FBpp0305561	Akt1,CG12264,CG2051,CG4038,CSN1b,CSN5,CSN6,Cdc27,Cdk12,Cdk9,Cul1,Prp19,Rep,Rpd3,Rpn11,alien,rept,scny,shark,shtd,slmb
GO:0044804	autophagy of nucleus	2	13	0.031	FBpp0074822,FBpp0083975	Atg3,Atg6
GO:1900006	positive regulation of dendrite development	2	13	0.031	FBpp0301099,FBpp0302752	Rop,Sec23
GO:0060560	developmental growth involved in morphogenesis	4	81	0.0315	FBpp0071061,FBpp0074609,FBpp0077473,FBpp0086382	Rab5,alphaSnap,mys,shark
GO:0061077	chaperone-mediated protein folding	3	42	0.0315	FBpp0082516,FBpp0082787,FBpp0083683	Cctgamma,Hsc70-4,T-cp1
GO:0035282	segmentation	7	236	0.0321	FBpp0073173,FBpp0073966,FBpp0077473,FBpp0077941,FBpp0082743,FBpp0083434,FBpp0294043	AGO1,CSN5,Chc,Rab5,Rpd3,kni,slmb
GO:0042052	rhabdomere development	3	43	0.0332	FBpp0076408,FBpp0085888,FBpp0086941	Amph,Sec6,msk
GO:0050773	regulation of dendrite development	3	43	0.0332	FBpp0082682,FBpp0301099,FBpp0302752	Akt1,Rop,Sec23
GO:1901214	regulation of neuron death	3	43	0.0332	FBpp0076408,FBpp0082682,FBpp0111818	Akt1,TER94,msk
GO:0014066	regulation of phosphatidylinositol 3-kinase signaling	2	14	0.0337	FBpp0079677,FBpp0087921	Cul1,chico
GO:0046605	regulation of centrosome cycle	2	14	0.0337	FBpp0083434,FBpp0293235	Nup358,slmb
GO:0046843	dorsal appendage formation	3	44	0.0346	FBpp0083434,FBpp0086382,FBpp0305866	shark,shi,slmb
GO:0048488	synaptic vesicle endocytosis	3	44	0.0346	FBpp0077473,FBpp0088945,FBpp0305866	AP-2alpha,Rab5,shi
GO:0048598	embryonic morphogenesis	7	241	0.0346	FBpp0070402,FBpp0071061,FBpp0072306,FBpp0074899,FBpp0076487,FBpp0077473,FBpp0086382	Rab5,crn,hid,mys,pbl,shark,zip
GO:0090150	establishment of protein localization to membrane	3	44	0.0346	FBpp0077208,FBpp0078326,FBpp0085888	Sec5,Sec6,Sec8
GO:0051241	negative regulation of multicellular organismal process	6	186	0.0359	FBpp0073173,FBpp0073572,FBpp0082682,FBpp0082743,FBpp0083434,FBpp0304475	Akt1,Bap60,CSN5,Rpd3,cher,slmb
GO:0009798	axis specification	6	187	0.0366	FBpp0072306,FBpp0073966,FBpp0077941,FBpp0082743,FBpp0083434,FBpp0086853	CSN5,Chc,Dp,kni,slmb,zip
GO:0045995	regulation of embryonic development	4	86	0.0366	FBpp0086382,FBpp0111818,FBpp0292260,FBpp0302752	Rop,Syx1A,TER94,shark
GO:0031145	anaphase-promoting complex-dependent catabolic process	2	15	0.0367	FBpp0073893,FBpp0305561	Cdc27,shtd
GO:0035072	ecdysone-mediated induction of salivary gland cell autophagic cell death	2	15	0.0367	FBpp0074756,FBpp0074899	hid,rept
GO:0048079	regulation of cuticle pigmentation	2	15	0.0367	FBpp0291363,FBpp0301099	Sec23,mgl
GO:0048583	regulation of response to stimulus	17	940	0.0367	FBpp0071848,FBpp0073173,FBpp0073966,FBpp0074756,FBpp0074899,FBpp0076487,FBpp0076806,FBpp0079278,FBpp0079677,FBpp0080622,FBpp0082682,FBpp0083434,FBpp0087921,FBpp0111818,FBpp0294043,FBpp0300511,FBpp0305866	AGO1,Akt1,CG10333,Cdk9,Chc,Cul1,Dop1R1,Rpd3,TER94,chico,emb,hid,pbl,rept,scny,shi,slmb
GO:0007443	Malpighian tubule morphogenesis	3	46	0.0374	FBpp0070402,FBpp0072306,FBpp0076487	crn,pbl,zip
GO:0070507	regulation of microtubule cytoskeleton organization	3	46	0.0374	FBpp0083434,FBpp0084900,FBpp0293235	Nup358,ncd,slmb
GO:0051495	positive regulation of cytoskeleton organization	3	47	0.0393	FBpp0293235,FBpp0304475,FBpp0305866	Nup358,cher,shi
GO:0042221	response to chemical	19	1107	0.0398	FBpp0070457,FBpp0071061,FBpp0072908,FBpp0073173,FBpp0074756,FBpp0074899,FBpp0079677,FBpp0082516,FBpp0082682,FBpp0085063,FBpp0087926,FBpp0089084,FBpp0293235,FBpp0294043,FBpp0300511,FBpp0304475,FBpp0304479,FBpp0305866,FBpp0306056	AGO1,Akt1,CG17737,Dop1R1,Fer1HCH,Hsc70-4,Nup358,Rpd3,Slh,Snmp1,cher,chico,drosha,eIF2B-beta,hid,mys,rept,shi,zfh1
GO:0051093	negative regulation of developmental process	6	192	0.0399	FBpp0073173,FBpp0073572,FBpp0082682,FBpp0082743,FBpp0083434,FBpp0304475	Akt1,Bap60,CSN5,Rpd3,cher,slmb
GO:0006607	NLS-bearing protein import into nucleus	2	16	0.04	FBpp0293235,FBpp0294035	Fs(2)Ket,Nup358
GO:0007392	initiation of dorsal closure	2	16	0.04	FBpp0072306,FBpp0086382	shark,zip
GO:0000904	cell morphogenesis involved in differentiation	10	444	0.0408	FBpp0071061,FBpp0073173,FBpp0074899,FBpp0077473,FBpp0082516,FBpp0082743,FBpp0083434,FBpp0085063,FBpp0111818,FBpp0304475	CSN5,Hsc70-4,Rab5,Rpd3,TER94,cher,hid,mys,slmb,zfh1
GO:0010605	negative regulation of macromolecule metabolic process	14	728	0.0408	FBpp0073173,FBpp0074756,FBpp0077134,FBpp0077208,FBpp0077941,FBpp0078318,FBpp0080138,FBpp0082516,FBpp0082743,FBpp0085063,FBpp0087926,FBpp0294043,FBpp0303869,FBpp0305866	AGO1,CG2051,CSN5,HP6,Hsc70-4,Rpd3,Sec5,Smg5,alien,drosha,kni,rept,shi,zfh1
GO:0022603	regulation of anatomical structure morphogenesis	7	252	0.0408	FBpp0071061,FBpp0072306,FBpp0073173,FBpp0074899,FBpp0076487,FBpp0086382,FBpp0301099	Rpd3,Sec23,hid,mys,pbl,shark,zip
GO:1902850	microtubule cytoskeleton organization involved in mitosis	4	90	0.0408	FBpp0070672,FBpp0072616,FBpp0084900,FBpp0085619	Klp61F,PCNA,ctp,ncd
GO:0002683	negative regulation of immune system process	3	49	0.0428	FBpp0076806,FBpp0082743,FBpp0304475	CSN5,cher,scny
GO:0007350	blastoderm segmentation	6	196	0.0428	FBpp0073173,FBpp0073966,FBpp0077941,FBpp0082743,FBpp0083434,FBpp0294043	AGO1,CSN5,Chc,Rpd3,kni,slmb
GO:0009306	protein secretion	3	49	0.0428	FBpp0072616,FBpp0083975,FBpp0086705	Atg6,Klp61F,Tango7
GO:0030198	extracellular matrix organization	3	49	0.0428	FBpp0073966,FBpp0301099,FBpp0305866	Chc,Sec23,shi
GO:0035120	post-embryonic appendage morphogenesis	8	319	0.0443	FBpp0070672,FBpp0071061,FBpp0072306,FBpp0074609,FBpp0074756,FBpp0076408,FBpp0077473,FBpp0111762	Rab5,alphaSnap,ctp,msk,mys,rept,sno,zip
GO:0006464	cellular protein modification process	19	1127	0.0458	FBpp0071848,FBpp0073173,FBpp0073893,FBpp0074756,FBpp0074841,FBpp0076806,FBpp0078013,FBpp0078318,FBpp0078664,FBpp0082682,FBpp0082743,FBpp0083434,FBpp0083658,FBpp0085658,FBpp0085902,FBpp0086382,FBpp0087921,FBpp0303869,FBpp0305561	Akt1,CG2051,CSN1b,CSN5,CSN6,Cdc27,Cdk12,Cdk9,Cul1,Prp19,Rep,Rpd3,Rpn11,alien,rept,scny,shark,shtd,slmb
GO:0016358	dendrite development	5	144	0.0458	FBpp0073173,FBpp0074899,FBpp0077473,FBpp0082682,FBpp0111818	Akt1,Rab5,Rpd3,TER94,hid
GO:0071897	DNA biosynthetic process	3	51	0.0466	FBpp0080138,FBpp0085619,FBpp0086853	Dp,PCNA,Smg5
GO:0007560	imaginal disc morphogenesis	9	389	0.047	FBpp0070672,FBpp0071061,FBpp0072306,FBpp0074609,FBpp0074756,FBpp0074899,FBpp0076408,FBpp0077473,FBpp0111762	Rab5,alphaSnap,ctp,hid,msk,mys,rept,sno,zip
GO:0006936	muscle contraction	2	18	0.0471	FBpp0072306,FBpp0074298	wupA,zip
GO:0022604	regulation of cell morphogenesis	5	146	0.0471	FBpp0071061,FBpp0073173,FBpp0076487,FBpp0086382,FBpp0301099	Rpd3,Sec23,mys,pbl,shark
GO:0031099	regeneration	2	18	0.0471	FBpp0079648,FBpp0082682	Akt1,RnrL
GO:0048803	imaginal disc-derived male genitalia morphogenesis	2	18	0.0471	FBpp0071061,FBpp0077473	Rab5,mys
GO:0071359	cellular response to dsRNA	2	18	0.0471	FBpp0087926,FBpp0294043	AGO1,drosha
GO:0007033	vacuole organization	3	52	0.0475	FBpp0074822,FBpp0083975,FBpp0111818	Atg3,Atg6,TER94
GO:0043066	negative regulation of apoptotic process	4	96	0.0476	FBpp0076408,FBpp0082682,FBpp0083434,FBpp0087921	Akt1,Cul1,msk,slmb
GO:1903046	meiotic cell cycle process	6	203	0.0477	FBpp0073659,FBpp0076487,FBpp0077134,FBpp0078326,FBpp0084351,FBpp0084900	Exo84,HP6,Nup93-1,Sec8,ncd,pbl

## Sheet: GO_Molecular_Function_HHLT-GAL4
#term ID	term description	observed gene count	background gene count	false discovery rate	matching proteins in your network (IDs)	matching proteins in your network (labels)
GO:0005488	binding	105	5248	9.2e-18	FBpp0070402,FBpp0070430,FBpp0070457,FBpp0070672,FBpp0071061,FBpp0071431,FBpp0071562,FBpp0071848,FBpp0071905,FBpp0072306,FBpp0072438,FBpp0072616,FBpp0072908,FBpp0073173,FBpp0073572,FBpp0073659,FBpp0073828,FBpp0073966,FBpp0074298,FBpp0074609,FBpp0074756,FBpp0074899,FBpp0076287,FBpp0076408,FBpp0076433,FBpp0076487,FBpp0076806,FBpp0077134,FBpp0077208,FBpp0077251,FBpp0077399,FBpp0077473,FBpp0077941,FBp…	AGO1,AP-2alpha,Akt1,Amph,Bap60,Bub3,CG10333,CG10889,CG11920,CG12264,CG16941,CG17737,CG2051,CG33123,CG3806,CG4038,CG5660,CG5706,CG6094,CG6227,CG7185,CG7794,CG8636,CG8728,CSN5,CSN6,Cctgamma,Cdk12,Cdk9,Chc,Cirl,Cpsf100,Cul1,CycK,D1,Dic61B,Dp,EF2,Elf,FANCI,Fer1HCH,Fs(2)Ket,HP6,Hsc70-4,Klp61F,Nsf2,Nup214,Nup358,Nup93-1,PCNA,Rab35,Rab5,Ref1,RnrL,Rop,RpII33,Rpd3,Rph,Rpn6,SMC2,SNF4Agamma,Sec23,Sec5,Sec6,…
GO:0005515	protein binding	66	2272	1.3e-15	FBpp0070672,FBpp0071061,FBpp0071431,FBpp0071848,FBpp0071905,FBpp0072306,FBpp0072438,FBpp0072616,FBpp0073173,FBpp0073572,FBpp0073659,FBpp0073966,FBpp0074298,FBpp0074609,FBpp0074756,FBpp0074899,FBpp0076408,FBpp0076487,FBpp0076806,FBpp0077134,FBpp0077208,FBpp0077399,FBpp0077473,FBpp0077941,FBpp0078007,FBpp0078013,FBpp0078318,FBpp0079278,FBpp0079677,FBpp0080121,FBpp0080685,FBpp0082137,FBpp0082516,FBp…	AGO1,AP-2alpha,Akt1,Bap60,Bub3,CG2051,CG3806,CSN5,CSN6,Cctgamma,Cdk12,Cdk9,Chc,Cpsf100,Cul1,CycK,Dic61B,Dp,FANCI,Fs(2)Ket,HP6,Hsc70-4,Klp61F,Nup214,Nup358,Nup93-1,Rab5,Rop,RpII33,Rpd3,Rph,Rpn6,SMC2,SNF4Agamma,Sec5,Sec6,Side,Slh,Syx18,Syx1A,Syx7,T-cp1,TER94,Tango7,Trn-SR,alien,alphaSnap,cher,chico,ctp,eIF5B,emb,hid,kni,mbo,msk,mys,ncd,pbl,rept,scny,shark,shi,slmb,wupA,zip
GO:0008135	translation factor activity, RNA binding	11	71	4.4e-08	FBpp0070430,FBpp0070457,FBpp0072908,FBpp0079680,FBpp0082994,FBpp0086705,FBpp0089217,FBpp0301570,FBpp0304202,FBpp0305182,FBpp0305302	CG17737,CG3806,CG6094,CG8636,EF2,Elf,Tango7,eIF-1A,eIF2B-beta,eIF5B,eRF1
GO:0035639	purine ribonucleoside triphosphate binding	28	779	1.79e-07	FBpp0071848,FBpp0072306,FBpp0072616,FBpp0073828,FBpp0074756,FBpp0076287,FBpp0077251,FBpp0077473,FBpp0078013,FBpp0079648,FBpp0079999,FBpp0080622,FBpp0082139,FBpp0082346,FBpp0082682,FBpp0082787,FBpp0082964,FBpp0083683,FBpp0084021,FBpp0084900,FBpp0086382,FBpp0086591,FBpp0111818,FBpp0301570,FBpp0305182,FBpp0305302,FBpp0305729,FBpp0305866	Akt1,CG10333,CG33123,CG5660,CG5706,CG6227,CG7794,Cctgamma,Cdk12,Cdk9,EF2,Elf,Klp61F,Nsf2,Rab35,Rab5,RnrL,SMC2,T-cp1,TER94,Vha55,Vha68-2,eIF5B,ncd,rept,shark,shi,zip
GO:0032555	purine ribonucleotide binding	28	791	2.13e-07	FBpp0071848,FBpp0072306,FBpp0072616,FBpp0073828,FBpp0074756,FBpp0076287,FBpp0077251,FBpp0077473,FBpp0078013,FBpp0079648,FBpp0079999,FBpp0080622,FBpp0082139,FBpp0082346,FBpp0082682,FBpp0082787,FBpp0082964,FBpp0083683,FBpp0084021,FBpp0084900,FBpp0086382,FBpp0086591,FBpp0111818,FBpp0301570,FBpp0305182,FBpp0305302,FBpp0305729,FBpp0305866	Akt1,CG10333,CG33123,CG5660,CG5706,CG6227,CG7794,Cctgamma,Cdk12,Cdk9,EF2,Elf,Klp61F,Nsf2,Rab35,Rab5,RnrL,SMC2,T-cp1,TER94,Vha55,Vha68-2,eIF5B,ncd,rept,shark,shi,zip
GO:1901363	heterocyclic compound binding	56	2701	2.54e-07	FBpp0070402,FBpp0070430,FBpp0070457,FBpp0071562,FBpp0071848,FBpp0072306,FBpp0072616,FBpp0072908,FBpp0073572,FBpp0073659,FBpp0073828,FBpp0074756,FBpp0076287,FBpp0076408,FBpp0076433,FBpp0077251,FBpp0077473,FBpp0077941,FBpp0078013,FBpp0079648,FBpp0079680,FBpp0079874,FBpp0079999,FBpp0080121,FBpp0080138,FBpp0080622,FBpp0080685,FBpp0081156,FBpp0081467,FBpp0082139,FBpp0082346,FBpp0082682,FBpp0082787,FBp…	AGO1,Akt1,Bap60,CG10333,CG11920,CG12264,CG16941,CG17737,CG33123,CG3806,CG4038,CG5660,CG5706,CG6094,CG6227,CG7185,CG7794,CG8636,Cctgamma,Cdk12,Cdk9,D1,Dp,EF2,Elf,Klp61F,Nsf2,Nup93-1,PCNA,Rab35,Rab5,Ref1,RnrL,RpII33,SMC2,Side,Smg5,T-cp1,TER94,Tango7,Vha55,Vha68-2,crn,drosha,eIF-1A,eIF2B-beta,eIF5B,eRF1,kni,msk,ncd,rept,shark,shi,zfh1,zip
GO:0043168	anion binding	32	1051	2.83e-07	FBpp0071431,FBpp0071848,FBpp0072306,FBpp0072616,FBpp0073828,FBpp0074756,FBpp0076287,FBpp0076487,FBpp0077251,FBpp0077473,FBpp0078013,FBpp0079648,FBpp0079874,FBpp0079999,FBpp0080622,FBpp0082139,FBpp0082346,FBpp0082682,FBpp0082787,FBpp0082964,FBpp0083683,FBpp0084021,FBpp0084900,FBpp0086382,FBpp0086591,FBpp0086941,FBpp0111818,FBpp0301570,FBpp0305182,FBpp0305302,FBpp0305729,FBpp0305866	Akt1,Amph,CG10333,CG12264,CG33123,CG5660,CG5706,CG6227,CG7794,Cctgamma,Cdk12,Cdk9,EF2,Elf,Klp61F,Nsf2,Rab35,Rab5,RnrL,Rph,SMC2,T-cp1,TER94,Vha55,Vha68-2,eIF5B,ncd,pbl,rept,shark,shi,zip
GO:0097159	organic cyclic compound binding	56	2716	2.83e-07	FBpp0070402,FBpp0070430,FBpp0070457,FBpp0071562,FBpp0071848,FBpp0072306,FBpp0072616,FBpp0072908,FBpp0073572,FBpp0073659,FBpp0073828,FBpp0074756,FBpp0076287,FBpp0076408,FBpp0076433,FBpp0077251,FBpp0077473,FBpp0077941,FBpp0078013,FBpp0079648,FBpp0079680,FBpp0079874,FBpp0079999,FBpp0080121,FBpp0080138,FBpp0080622,FBpp0080685,FBpp0081156,FBpp0081467,FBpp0082139,FBpp0082346,FBpp0082682,FBpp0082787,FBp…	AGO1,Akt1,Bap60,CG10333,CG11920,CG12264,CG16941,CG17737,CG33123,CG3806,CG4038,CG5660,CG5706,CG6094,CG6227,CG7185,CG7794,CG8636,Cctgamma,Cdk12,Cdk9,D1,Dp,EF2,Elf,Klp61F,Nsf2,Nup93-1,PCNA,Rab35,Rab5,Ref1,RnrL,RpII33,SMC2,Side,Smg5,T-cp1,TER94,Tango7,Vha55,Vha68-2,crn,drosha,eIF-1A,eIF2B-beta,eIF5B,eRF1,kni,msk,ncd,rept,shark,shi,zfh1,zip
GO:0003723	RNA binding	22	598	3.08e-06	FBpp0070402,FBpp0070430,FBpp0070457,FBpp0071562,FBpp0072908,FBpp0076408,FBpp0076433,FBpp0079680,FBpp0080138,FBpp0081156,FBpp0082817,FBpp0082994,FBpp0084021,FBpp0084144,FBpp0086705,FBpp0087926,FBpp0089217,FBpp0294043,FBpp0301570,FBpp0304202,FBpp0305182,FBpp0305302	AGO1,CG11920,CG16941,CG17737,CG3806,CG4038,CG5706,CG6094,CG7185,CG8636,EF2,Elf,Ref1,Smg5,Tango7,crn,drosha,eIF-1A,eIF2B-beta,eIF5B,eRF1,msk
GO:0036094	small molecule binding	29	1031	6.19e-06	FBpp0071848,FBpp0072306,FBpp0072616,FBpp0073828,FBpp0074756,FBpp0076287,FBpp0077251,FBpp0077473,FBpp0078013,FBpp0079648,FBpp0079874,FBpp0079999,FBpp0080622,FBpp0082139,FBpp0082346,FBpp0082682,FBpp0082787,FBpp0082964,FBpp0083683,FBpp0084021,FBpp0084900,FBpp0086382,FBpp0086591,FBpp0111818,FBpp0301570,FBpp0305182,FBpp0305302,FBpp0305729,FBpp0305866	Akt1,CG10333,CG12264,CG33123,CG5660,CG5706,CG6227,CG7794,Cctgamma,Cdk12,Cdk9,EF2,Elf,Klp61F,Nsf2,Rab35,Rab5,RnrL,SMC2,T-cp1,TER94,Vha55,Vha68-2,eIF5B,ncd,rept,shark,shi,zip
GO:0008565	protein transporter activity	8	69	1.49e-05	FBpp0076408,FBpp0077399,FBpp0079278,FBpp0082568,FBpp0083502,FBpp0083646,FBpp0088945,FBpp0294035	AP-2alpha,AP-2mu,AP-2sigma,Fs(2)Ket,Trn-SR,emb,ldlCp,msk
GO:0000149	SNARE binding	7	48	1.76e-05	FBpp0074609,FBpp0078007,FBpp0084050,FBpp0085888,FBpp0089084,FBpp0292260,FBpp0302752	Rop,Sec6,Slh,Syx18,Syx1A,Syx7,alphaSnap
GO:0005524	ATP binding	21	626	1.86e-05	FBpp0071848,FBpp0072306,FBpp0072616,FBpp0073828,FBpp0074756,FBpp0076287,FBpp0077251,FBpp0078013,FBpp0079648,FBpp0079999,FBpp0080622,FBpp0082139,FBpp0082346,FBpp0082682,FBpp0082787,FBpp0083683,FBpp0084021,FBpp0084900,FBpp0086382,FBpp0086591,FBpp0111818	Akt1,CG10333,CG33123,CG5660,CG5706,CG6227,Cctgamma,Cdk12,Cdk9,Klp61F,Nsf2,RnrL,SMC2,T-cp1,TER94,Vha55,Vha68-2,ncd,rept,shark,zip
GO:0017111	nucleoside-triphosphatase activity	18	467	1.86e-05	FBpp0070672,FBpp0072306,FBpp0072616,FBpp0073828,FBpp0074756,FBpp0077473,FBpp0079999,FBpp0080622,FBpp0082346,FBpp0082787,FBpp0082964,FBpp0084900,FBpp0086591,FBpp0301570,FBpp0305182,FBpp0305302,FBpp0305729,FBpp0305866	CG10333,CG6227,CG7794,Cctgamma,EF2,Elf,Klp61F,Nsf2,Rab35,Rab5,SMC2,Vha68-2,ctp,eIF5B,ncd,rept,shi,zip
GO:0003743	translation initiation factor activity	7	50	1.94e-05	FBpp0070430,FBpp0070457,FBpp0072908,FBpp0082994,FBpp0086705,FBpp0089217,FBpp0301570	CG17737,CG3806,CG8636,Tango7,eIF-1A,eIF2B-beta,eIF5B
GO:0008536	Ran GTPase binding	5	21	5.53e-05	FBpp0076408,FBpp0077399,FBpp0079278,FBpp0293235,FBpp0294035	Fs(2)Ket,Nup358,Trn-SR,emb,msk
GO:0019899	enzyme binding	16	423	6.71e-05	FBpp0071431,FBpp0074899,FBpp0076408,FBpp0076487,FBpp0077208,FBpp0077399,FBpp0079278,FBpp0086705,FBpp0087756,FBpp0087921,FBpp0089217,FBpp0290803,FBpp0293235,FBpp0294035,FBpp0294043,FBpp0301570	AGO1,CG3806,Cul1,FANCI,Fs(2)Ket,Nup358,Rph,SNF4Agamma,Sec5,Tango7,Trn-SR,eIF5B,emb,hid,msk,pbl
GO:0008144	drug binding	22	808	0.00018	FBpp0071848,FBpp0072306,FBpp0072616,FBpp0073828,FBpp0074756,FBpp0076287,FBpp0077251,FBpp0078013,FBpp0079648,FBpp0079874,FBpp0079999,FBpp0080622,FBpp0082139,FBpp0082346,FBpp0082682,FBpp0082787,FBpp0083683,FBpp0084021,FBpp0084900,FBpp0086382,FBpp0086591,FBpp0111818	Akt1,CG10333,CG12264,CG33123,CG5660,CG5706,CG6227,Cctgamma,Cdk12,Cdk9,Klp61F,Nsf2,RnrL,SMC2,T-cp1,TER94,Vha55,Vha68-2,ncd,rept,shark,zip
GO:0003676	nucleic acid binding	35	1728	0.00026	FBpp0070402,FBpp0070430,FBpp0070457,FBpp0071562,FBpp0071848,FBpp0072908,FBpp0073572,FBpp0073659,FBpp0073828,FBpp0076408,FBpp0076433,FBpp0077941,FBpp0078013,FBpp0079680,FBpp0080121,FBpp0080138,FBpp0080622,FBpp0080685,FBpp0081156,FBpp0081467,FBpp0082817,FBpp0082994,FBpp0084021,FBpp0084144,FBpp0085063,FBpp0085619,FBpp0086705,FBpp0086853,FBpp0087926,FBpp0089217,FBpp0294043,FBpp0301570,FBpp0304202,FBp…	AGO1,Bap60,CG10333,CG11920,CG16941,CG17737,CG3806,CG4038,CG5706,CG6094,CG6227,CG7185,CG8636,Cdk12,Cdk9,D1,Dp,EF2,Elf,Nup93-1,PCNA,Ref1,RpII33,Side,Smg5,Tango7,crn,drosha,eIF-1A,eIF2B-beta,eIF5B,eRF1,kni,msk,zfh1
GO:0043167	ion binding	38	1993	0.00039	FBpp0071431,FBpp0071848,FBpp0072306,FBpp0072616,FBpp0073828,FBpp0074756,FBpp0076287,FBpp0076487,FBpp0077251,FBpp0077473,FBpp0077941,FBpp0078013,FBpp0079648,FBpp0079874,FBpp0079999,FBpp0080622,FBpp0082139,FBpp0082346,FBpp0082682,FBpp0082787,FBpp0082964,FBpp0083248,FBpp0083683,FBpp0084021,FBpp0084900,FBpp0086382,FBpp0086591,FBpp0086941,FBpp0087958,FBpp0111818,FBpp0291363,FBpp0301099,FBpp0301570,FBp…	Akt1,Amph,CG10333,CG10889,CG12264,CG33123,CG5660,CG5706,CG6227,CG7794,CG8728,Cctgamma,Cdk12,Cdk9,EF2,Elf,Fer1HCH,Klp61F,Nsf2,Rab35,Rab5,RnrL,Rph,SMC2,Sec23,T-cp1,TER94,Vha55,Vha68-2,eIF5B,kni,mgl,ncd,pbl,rept,shark,shi,zip
GO:0003747	translation release factor activity	3	5	0.0005	FBpp0079680,FBpp0304202,FBpp0305302	CG6094,Elf,eRF1
GO:0051020	GTPase binding	9	175	0.00076	FBpp0071431,FBpp0076408,FBpp0076487,FBpp0077208,FBpp0077399,FBpp0079278,FBpp0089217,FBpp0293235,FBpp0294035	CG3806,Fs(2)Ket,Nup358,Rph,Sec5,Trn-SR,emb,msk,pbl
GO:0002161	aminoacyl-tRNA editing activity	3	9	0.0018	FBpp0076287,FBpp0077251,FBpp0084021	CG33123,CG5660,CG5706
GO:0016787	hydrolase activity	32	1685	0.0018	FBpp0070672,FBpp0072306,FBpp0072616,FBpp0073173,FBpp0073828,FBpp0074756,FBpp0076287,FBpp0076806,FBpp0077251,FBpp0077473,FBpp0078664,FBpp0079680,FBpp0079999,FBpp0080138,FBpp0080622,FBpp0082346,FBpp0082743,FBpp0082787,FBpp0082964,FBpp0084021,FBpp0084900,FBpp0086591,FBpp0087926,FBpp0087958,FBpp0089041,FBpp0111818,FBpp0112080,FBpp0301570,FBpp0305182,FBpp0305302,FBpp0305729,FBpp0305866	CG10333,CG10663,CG33123,CG5660,CG5706,CG6094,CG6227,CG7794,CG8728,CSN5,Cctgamma,EF2,Elf,Klp61F,Nsf2,Prosalpha7,Rab35,Rab5,Rpd3,Rpn11,SMC2,Smg5,TER94,Vha68-2,ctp,drosha,eIF5B,ncd,rept,scny,shi,zip
GO:0140098	catalytic activity, acting on RNA	9	199	0.0018	FBpp0073828,FBpp0076287,FBpp0077251,FBpp0079680,FBpp0080121,FBpp0080138,FBpp0080622,FBpp0084021,FBpp0087926	CG10333,CG33123,CG5660,CG5706,CG6094,CG6227,RpII33,Smg5,drosha
GO:0017016	Ras GTPase binding	8	158	0.0019	FBpp0071431,FBpp0076408,FBpp0076487,FBpp0077208,FBpp0077399,FBpp0079278,FBpp0293235,FBpp0294035	Fs(2)Ket,Nup358,Rph,Sec5,Trn-SR,emb,msk,pbl
GO:0016887	ATPase activity	11	302	0.002	FBpp0070672,FBpp0072306,FBpp0072616,FBpp0073828,FBpp0074756,FBpp0079999,FBpp0080622,FBpp0082346,FBpp0082787,FBpp0084900,FBpp0086591	CG10333,CG6227,Cctgamma,Klp61F,Nsf2,SMC2,Vha68-2,ctp,ncd,rept,zip
GO:0003924	GTPase activity	7	147	0.0063	FBpp0077473,FBpp0082964,FBpp0301570,FBpp0305182,FBpp0305302,FBpp0305729,FBpp0305866	CG7794,EF2,Elf,Rab35,Rab5,eIF5B,shi
GO:0004832	valine-tRNA ligase activity	2	3	0.0073	FBpp0076287,FBpp0077251	CG33123,CG5660
GO:0005525	GTP binding	7	155	0.008	FBpp0077473,FBpp0082964,FBpp0301570,FBpp0305182,FBpp0305302,FBpp0305729,FBpp0305866	CG7794,EF2,Elf,Rab35,Rab5,eIF5B,shi
GO:0008139	nuclear localization sequence binding	3	18	0.008	FBpp0071905,FBpp0077399,FBpp0294035	Fs(2)Ket,Nup214,Trn-SR
GO:0008353	RNA polymerase II CTD heptapeptide repeat kinase activity	2	4	0.0089	FBpp0071848,FBpp0078013	Cdk12,Cdk9
GO:0017056	structural constituent of nuclear pore	3	20	0.0089	FBpp0071905,FBpp0073659,FBpp0082137	Nup214,Nup93-1,mbo
GO:0042623	ATPase activity, coupled	9	262	0.0089	FBpp0070672,FBpp0072306,FBpp0072616,FBpp0073828,FBpp0074756,FBpp0079999,FBpp0080622,FBpp0082787,FBpp0084900	CG10333,CG6227,Cctgamma,Klp61F,Vha68-2,ctp,ncd,rept,zip
GO:0005484	SNAP receptor activity	3	24	0.0138	FBpp0078007,FBpp0084050,FBpp0292260	Syx18,Syx1A,Syx7
GO:0030332	cyclin binding	2	6	0.0154	FBpp0071848,FBpp0078013	Cdk12,Cdk9
GO:0003714	transcription corepressor activity	3	31	0.0255	FBpp0073173,FBpp0074756,FBpp0303869	Rpd3,alien,rept
GO:0008134	transcription factor binding	6	156	0.0292	FBpp0071848,FBpp0073572,FBpp0077941,FBpp0078013,FBpp0086853,FBpp0303869	Bap60,Cdk12,Cdk9,Dp,alien,kni
GO:0140101	catalytic activity, acting on a tRNA	4	71	0.0349	FBpp0076287,FBpp0077251,FBpp0079680,FBpp0084021	CG33123,CG5660,CG5706,CG6094
GO:0004812	aminoacyl-tRNA ligase activity	3	38	0.0411	FBpp0076287,FBpp0077251,FBpp0084021	CG33123,CG5660,CG5706

## Sheet: GO_Cellular_Component_HHLT-GAL4
#term ID	term description	observed gene count	background gene count	false discovery rate	matching proteins in your network (IDs)	matching proteins in your network (labels)
GO:0044424	intracellular part	119	5758	1.75e-25	FBpp0070402,FBpp0070430,FBpp0070457,FBpp0070672,FBpp0071046,FBpp0071061,FBpp0071431,FBpp0071562,FBpp0071848,FBpp0071905,FBpp0072306,FBpp0072438,FBpp0072616,FBpp0072908,FBpp0073173,FBpp0073572,FBpp0073659,FBpp0073828,FBpp0073893,FBpp0073966,FBpp0074298,FBpp0074609,FBpp0074756,FBpp0074822,FBpp0074841,FBpp0074899,FBpp0076287,FBpp0076408,FBpp0076433,FBpp0076487,FBpp0076785,FBpp0076806,FBpp0077134,FBp…	AGO1,AP-2alpha,AP-2mu,AP-2sigma,Akt1,Amph,Atg3,Atg6,Bap60,Bub3,CG10333,CG10483,CG11920,CG11985,CG12264,CG16941,CG17737,CG2051,CG33123,CG3806,CG4038,CG5660,CG5706,CG6094,CG6227,CG7185,CG7794,CG8636,CG8728,CSN1b,CSN5,CSN6,Cctgamma,Cdc27,Cdk12,Cdk9,Chc,Cirl,Cpsf100,Cul1,CycK,D1,Dic61B,Dot,Dp,EF2,Elf,Exo84,Fer1HCH,Fs(2)Ket,HP6,Hsc70-4,Klp61F,Nsf2,Nup214,Nup358,Nup93-1,PCNA,Prosalpha7,Prp19,Rab35,Rab5…
GO:0032991	protein-containing complex	83	2565	2.46e-25	FBpp0070402,FBpp0070430,FBpp0070457,FBpp0070672,FBpp0071061,FBpp0071562,FBpp0071848,FBpp0071905,FBpp0072306,FBpp0072438,FBpp0072616,FBpp0072908,FBpp0073173,FBpp0073572,FBpp0073659,FBpp0073828,FBpp0073893,FBpp0073966,FBpp0074298,FBpp0074756,FBpp0074822,FBpp0074841,FBpp0077208,FBpp0077251,FBpp0078007,FBpp0078013,FBpp0078326,FBpp0078664,FBpp0079278,FBpp0079680,FBpp0079874,FBpp0079999,FBpp0080048,FBp…	AGO1,AP-2alpha,AP-2mu,AP-2sigma,Atg3,Atg6,Bap60,Bub3,CG10333,CG11920,CG11985,CG12264,CG16941,CG17737,CG33123,CG3806,CG4038,CG5706,CG6094,CG6227,CG8636,CSN1b,CSN5,CSN6,Cctgamma,Cdc27,Cdk12,Cdk9,Chc,Cngl,Cpsf100,Cul1,CycK,D1,Dic61B,Dp,Elf,Exo84,Fer1HCH,Fs(2)Ket,Klp61F,Nup214,Nup93-1,PCNA,Prosalpha7,Prp19,Ref1,Rep,RpII33,Rpd3,Rpn11,Rpn6,SMC2,Sec23,Sec5,Sec6,Sec8,Smg5,Syx18,Syx1A,Syx7,T-cp1,TER94,Tan…
GO:0044464	cell part	126	6736	2.46e-25	FBpp0070402,FBpp0070430,FBpp0070457,FBpp0070672,FBpp0071046,FBpp0071061,FBpp0071431,FBpp0071562,FBpp0071848,FBpp0071905,FBpp0072306,FBpp0072438,FBpp0072616,FBpp0072908,FBpp0073173,FBpp0073572,FBpp0073659,FBpp0073828,FBpp0073893,FBpp0073966,FBpp0074298,FBpp0074609,FBpp0074756,FBpp0074822,FBpp0074841,FBpp0074899,FBpp0076287,FBpp0076408,FBpp0076433,FBpp0076487,FBpp0076785,FBpp0076806,FBpp0077134,FBp…	AGO1,AP-2alpha,AP-2mu,AP-2sigma,Akt1,Amph,Atg3,Atg6,Bap60,Bub3,CG10333,CG10483,CG11920,CG11985,CG12264,CG16941,CG17737,CG2051,CG33123,CG3806,CG4038,CG5660,CG5706,CG6094,CG6227,CG7185,CG7794,CG8636,CG8728,CSN1b,CSN5,CSN6,Cctgamma,Cdc27,Cdk12,Cdk9,Chc,Cirl,Cngl,Cpsf100,Cul1,CycK,D1,Dic61B,Dop1R1,Dot,Dp,EF2,Elf,Exo84,Fer1HCH,Fs(2)Ket,HP6,Hsc70-4,Klp61F,Nsf2,Nup214,Nup358,Nup93-1,PCNA,Prosalpha7,Prp1…
GO:0043226	organelle	95	4694	1.94e-15	FBpp0070402,FBpp0070672,FBpp0071046,FBpp0071061,FBpp0071431,FBpp0071562,FBpp0071848,FBpp0071905,FBpp0072306,FBpp0072438,FBpp0072616,FBpp0073173,FBpp0073572,FBpp0073659,FBpp0073828,FBpp0073893,FBpp0073966,FBpp0074298,FBpp0074609,FBpp0074756,FBpp0074822,FBpp0074841,FBpp0074899,FBpp0076287,FBpp0076408,FBpp0076433,FBpp0076487,FBpp0076806,FBpp0077134,FBpp0077208,FBpp0077221,FBpp0077399,FBpp0077473,FBp…	AGO1,AP-2alpha,AP-2mu,AP-2sigma,Akt1,Atg3,Atg6,Bap60,Bub3,CG10333,CG11920,CG11985,CG12264,CG16941,CG2051,CG4038,CG5660,CG6094,CG6227,CG7185,CG7794,CG8728,CSN1b,CSN5,CSN6,Cdc27,Cdk12,Cdk9,Chc,Cirl,Cpsf100,Cul1,CycK,D1,Dic61B,Dot,Dp,Fer1HCH,Fs(2)Ket,HP6,Hsc70-4,Klp61F,Nup214,Nup358,Nup93-1,PCNA,Prp19,Rab35,Rab5,Ref1,Rep,RpII33,Rpd3,Rph,SMC2,SNF4Agamma,Sec23,Sec5,Slh,Smg5,Snmp1,Syx18,Syx1A,Syx7,TER9…
GO:0043229	intracellular organelle	94	4624	2.44e-15	FBpp0070402,FBpp0070672,FBpp0071046,FBpp0071061,FBpp0071431,FBpp0071562,FBpp0071848,FBpp0071905,FBpp0072306,FBpp0072438,FBpp0072616,FBpp0073173,FBpp0073572,FBpp0073659,FBpp0073828,FBpp0073893,FBpp0073966,FBpp0074298,FBpp0074609,FBpp0074756,FBpp0074822,FBpp0074841,FBpp0074899,FBpp0076287,FBpp0076408,FBpp0076433,FBpp0076487,FBpp0076806,FBpp0077134,FBpp0077208,FBpp0077221,FBpp0077399,FBpp0077473,FBp…	AGO1,AP-2alpha,AP-2mu,AP-2sigma,Akt1,Atg3,Atg6,Bap60,Bub3,CG10333,CG11920,CG11985,CG12264,CG16941,CG2051,CG4038,CG5660,CG6094,CG6227,CG7185,CG7794,CG8728,CSN1b,CSN5,CSN6,Cdc27,Cdk12,Cdk9,Chc,Cirl,Cpsf100,Cul1,CycK,D1,Dic61B,Dot,Dp,Fer1HCH,Fs(2)Ket,HP6,Hsc70-4,Klp61F,Nup214,Nup358,Nup93-1,PCNA,Prp19,Rab35,Rab5,Ref1,Rep,RpII33,Rpd3,Rph,SMC2,SNF4Agamma,Sec23,Sec5,Slh,Smg5,Syx18,Syx1A,Syx7,TER94,Tang…
GO:0043227	membrane-bounded organelle	86	4110	6.23e-14	FBpp0070402,FBpp0071046,FBpp0071431,FBpp0071562,FBpp0071848,FBpp0071905,FBpp0072616,FBpp0073173,FBpp0073572,FBpp0073659,FBpp0073828,FBpp0073893,FBpp0073966,FBpp0074609,FBpp0074756,FBpp0074822,FBpp0074841,FBpp0074899,FBpp0076287,FBpp0076408,FBpp0076433,FBpp0076487,FBpp0076806,FBpp0077134,FBpp0077208,FBpp0077221,FBpp0077399,FBpp0077473,FBpp0077941,FBpp0078007,FBpp0078013,FBpp0078318,FBpp0079278,FBp…	AGO1,AP-2alpha,AP-2mu,AP-2sigma,Akt1,Atg3,Atg6,Bap60,Bub3,CG10333,CG11920,CG11985,CG12264,CG16941,CG2051,CG4038,CG5660,CG6094,CG6227,CG7185,CG8728,CSN1b,CSN5,CSN6,Cdc27,Cdk12,Cdk9,Chc,Cirl,Cpsf100,Cul1,CycK,D1,Dot,Dp,Fer1HCH,Fs(2)Ket,HP6,Hsc70-4,Klp61F,Nup214,Nup358,Nup93-1,PCNA,Prp19,Rab35,Rab5,Ref1,Rep,RpII33,Rpd3,Rph,SNF4Agamma,Sec23,Sec5,Slh,Smg5,Syx18,Syx1A,Syx7,TER94,Tango7,Trn-SR,Vha55,Vha…
GO:0005737	cytoplasm	79	3684	9.1e-13	FBpp0070402,FBpp0070430,FBpp0070457,FBpp0070672,FBpp0071061,FBpp0071431,FBpp0072306,FBpp0072438,FBpp0072616,FBpp0072908,FBpp0073828,FBpp0073966,FBpp0074298,FBpp0074609,FBpp0074822,FBpp0074899,FBpp0076287,FBpp0076408,FBpp0076487,FBpp0076785,FBpp0077208,FBpp0077251,FBpp0077399,FBpp0077473,FBpp0078007,FBpp0078326,FBpp0079278,FBpp0079677,FBpp0079680,FBpp0079874,FBpp0079999,FBpp0080048,FBpp0080121,FBp…	AGO1,AP-2alpha,AP-2mu,AP-2sigma,Akt1,Amph,Atg3,Atg6,CG10333,CG10483,CG12264,CG17737,CG33123,CG3806,CG5660,CG5706,CG6094,CG6227,CG8636,CG8728,CSN5,Cctgamma,Chc,Cirl,D1,Dic61B,EF2,Elf,Exo84,Fer1HCH,Fs(2)Ket,Hsc70-4,Klp61F,Nsf2,Nup358,Rab35,Rab5,Rep,Rop,RpII33,Rph,SMC2,SNF4Agamma,Sec23,Sec5,Sec6,Sec8,Slh,Smg5,Syx18,Syx1A,Syx7,T-cp1,TER94,Tango7,Trn-SR,Vha55,Vha68-2,alien,alphaSnap,beta'COP,cher,chic…
GO:0044422	organelle part	66	2676	1.21e-12	FBpp0070402,FBpp0070672,FBpp0071061,FBpp0071431,FBpp0071562,FBpp0071848,FBpp0071905,FBpp0072306,FBpp0072438,FBpp0072616,FBpp0073173,FBpp0073572,FBpp0073659,FBpp0073828,FBpp0073893,FBpp0073966,FBpp0074298,FBpp0074609,FBpp0074756,FBpp0074841,FBpp0076408,FBpp0076806,FBpp0077134,FBpp0077399,FBpp0078013,FBpp0078318,FBpp0079278,FBpp0079680,FBpp0079999,FBpp0080048,FBpp0080121,FBpp0080138,FBpp0080622,FBp…	AP-2alpha,AP-2mu,AP-2sigma,Bap60,Bub3,CG10333,CG11920,CG11985,CG16941,CG2051,CG4038,CG6094,CG6227,CG7794,CG8728,CSN1b,CSN5,CSN6,Cdc27,Cdk12,Cdk9,Chc,Cpsf100,D1,Dic61B,Dp,Fs(2)Ket,HP6,Hsc70-4,Klp61F,Nup214,Nup358,Nup93-1,Prp19,Rab35,Ref1,Rep,RpII33,Rpd3,Rph,SMC2,Sec23,Slh,Smg5,Tango7,Trn-SR,Vha55,Vha68-2,alien,alphaSnap,beta'COP,cher,crn,ctp,emb,ldlCp,mbo,msk,mys,ncd,rept,scny,shi,shtd,wupA,zip
GO:0044446	intracellular organelle part	64	2622	6.06e-12	FBpp0070402,FBpp0070672,FBpp0071431,FBpp0071562,FBpp0071848,FBpp0071905,FBpp0072306,FBpp0072438,FBpp0072616,FBpp0073173,FBpp0073572,FBpp0073659,FBpp0073828,FBpp0073893,FBpp0073966,FBpp0074298,FBpp0074609,FBpp0074756,FBpp0074841,FBpp0076408,FBpp0076806,FBpp0077134,FBpp0077399,FBpp0078013,FBpp0078318,FBpp0079278,FBpp0079680,FBpp0079999,FBpp0080048,FBpp0080121,FBpp0080138,FBpp0080622,FBpp0081156,FBp…	AP-2alpha,AP-2mu,AP-2sigma,Bap60,Bub3,CG10333,CG11920,CG11985,CG16941,CG2051,CG4038,CG6094,CG6227,CG7794,CG8728,CSN1b,CSN5,CSN6,Cdc27,Cdk12,Cdk9,Chc,Cpsf100,D1,Dic61B,Dp,Fs(2)Ket,HP6,Hsc70-4,Klp61F,Nup214,Nup358,Nup93-1,Prp19,Rab35,Ref1,Rep,RpII33,Rpd3,Rph,SMC2,Sec23,Slh,Smg5,Tango7,Trn-SR,Vha55,Vha68-2,alien,alphaSnap,beta'COP,crn,ctp,emb,ldlCp,mbo,msk,ncd,rept,scny,shi,shtd,wupA,zip
GO:0044444	cytoplasmic part	61	2614	2.27e-10	FBpp0070430,FBpp0070457,FBpp0070672,FBpp0071061,FBpp0071431,FBpp0072306,FBpp0072438,FBpp0072616,FBpp0072908,FBpp0073966,FBpp0074298,FBpp0074609,FBpp0074822,FBpp0074899,FBpp0076287,FBpp0076408,FBpp0076487,FBpp0077208,FBpp0077473,FBpp0078007,FBpp0078326,FBpp0079677,FBpp0079680,FBpp0079874,FBpp0079999,FBpp0080048,FBpp0082139,FBpp0082516,FBpp0082568,FBpp0082682,FBpp0082787,FBpp0082994,FBpp0083502,FBp…	AGO1,AP-2alpha,AP-2mu,AP-2sigma,Akt1,Atg3,Atg6,CG12264,CG17737,CG3806,CG5660,CG5706,CG6094,CG8636,CG8728,Cctgamma,Chc,Cirl,Dic61B,EF2,Elf,Exo84,Fer1HCH,Fs(2)Ket,Hsc70-4,Klp61F,Rab35,Rab5,Rep,Rop,Rph,Sec23,Sec5,Sec6,Sec8,Slh,Syx18,Syx1A,Syx7,T-cp1,TER94,Tango7,Vha55,Vha68-2,alphaSnap,beta'COP,cher,chico,ctp,eIF-1A,eIF2B-beta,eRF1,hid,ldlCp,msk,mys,pbl,shark,shi,wupA,zip
GO:0043231	intracellular membrane-bounded organelle	74	3881	4.58e-09	FBpp0070402,FBpp0071046,FBpp0071562,FBpp0071848,FBpp0071905,FBpp0072616,FBpp0073173,FBpp0073572,FBpp0073659,FBpp0073828,FBpp0073893,FBpp0073966,FBpp0074609,FBpp0074756,FBpp0074822,FBpp0074841,FBpp0074899,FBpp0076287,FBpp0076408,FBpp0076433,FBpp0076487,FBpp0076806,FBpp0077134,FBpp0077221,FBpp0077399,FBpp0077941,FBpp0078013,FBpp0078318,FBpp0079278,FBpp0079677,FBpp0079680,FBpp0079874,FBpp0079999,FBp…	AGO1,Akt1,Atg3,Bap60,Bub3,CG10333,CG11920,CG11985,CG12264,CG16941,CG2051,CG4038,CG5660,CG6094,CG6227,CG7185,CG8728,CSN1b,CSN5,CSN6,Cdc27,Cdk12,Cdk9,Chc,Cpsf100,Cul1,CycK,D1,Dot,Dp,Fer1HCH,Fs(2)Ket,HP6,Hsc70-4,Klp61F,Nup214,Nup358,Nup93-1,PCNA,Prp19,Ref1,RpII33,Rpd3,SNF4Agamma,Sec23,Slh,Smg5,Syx18,TER94,Tango7,Trn-SR,Vha55,Vha68-2,alien,alphaSnap,beta'COP,bys,chico,crn,drosha,emb,hid,kni,ldlCp,mbo…
GO:0044428	nuclear part	36	1118	6.08e-09	FBpp0070402,FBpp0071562,FBpp0071848,FBpp0071905,FBpp0073173,FBpp0073572,FBpp0073659,FBpp0073828,FBpp0073893,FBpp0074756,FBpp0074841,FBpp0076408,FBpp0076806,FBpp0077134,FBpp0077399,FBpp0078013,FBpp0078318,FBpp0079278,FBpp0080121,FBpp0080138,FBpp0080622,FBpp0081156,FBpp0081484,FBpp0082137,FBpp0082516,FBpp0082743,FBpp0082817,FBpp0083658,FBpp0084144,FBpp0084726,FBpp0084831,FBpp0085902,FBpp0086853,FBp…	Bap60,Bub3,CG10333,CG11920,CG11985,CG16941,CG2051,CG4038,CG6227,CSN1b,CSN5,CSN6,Cdc27,Cdk12,Cdk9,Cpsf100,Dp,Fs(2)Ket,HP6,Hsc70-4,Nup214,Nup93-1,Prp19,Ref1,RpII33,Rpd3,Smg5,Trn-SR,alien,crn,emb,mbo,msk,rept,scny,shtd
GO:0005634	nucleus	55	2407	8.85e-09	FBpp0070402,FBpp0071046,FBpp0071562,FBpp0071848,FBpp0071905,FBpp0072616,FBpp0073173,FBpp0073572,FBpp0073659,FBpp0073828,FBpp0073893,FBpp0074756,FBpp0074841,FBpp0076408,FBpp0076433,FBpp0076487,FBpp0076806,FBpp0077134,FBpp0077399,FBpp0077941,FBpp0078013,FBpp0078318,FBpp0079278,FBpp0079677,FBpp0079874,FBpp0080121,FBpp0080138,FBpp0080622,FBpp0081156,FBpp0081467,FBpp0081484,FBpp0082137,FBpp0082516,FBp…	AGO1,Akt1,Bap60,Bub3,CG10333,CG11920,CG11985,CG12264,CG16941,CG2051,CG4038,CG6227,CG7185,CSN1b,CSN5,CSN6,Cdc27,Cdk12,Cdk9,Cpsf100,Cul1,CycK,D1,Dp,Fs(2)Ket,HP6,Hsc70-4,Klp61F,Nup214,Nup358,Nup93-1,PCNA,Prp19,Ref1,RpII33,Rpd3,SNF4Agamma,Smg5,Trn-SR,alien,bys,chico,crn,drosha,emb,kni,mbo,msk,ncd,pbl,rept,scny,shtd,sno,zfh1
GO:0031410	cytoplasmic vesicle	18	324	1.53e-07	FBpp0071431,FBpp0073966,FBpp0074609,FBpp0077208,FBpp0077473,FBpp0078007,FBpp0080048,FBpp0082139,FBpp0083502,FBpp0083646,FBpp0083975,FBpp0085658,FBpp0088945,FBpp0089084,FBpp0292260,FBpp0301099,FBpp0302596,FBpp0305729	AP-2alpha,AP-2mu,AP-2sigma,Atg6,Chc,Cirl,Rab35,Rab5,Rep,Rph,Sec23,Sec5,Slh,Syx1A,Syx7,Vha55,alphaSnap,beta'COP
GO:0005938	cell cortex	13	151	1.66e-07	FBpp0072306,FBpp0073966,FBpp0076408,FBpp0076487,FBpp0077208,FBpp0077473,FBpp0078326,FBpp0079677,FBpp0082682,FBpp0084050,FBpp0084351,FBpp0085888,FBpp0086382	Akt1,Chc,Exo84,Rab5,Sec5,Sec6,Sec8,Syx18,chico,msk,pbl,shark,zip
GO:0099568	cytoplasmic region	14	202	5.36e-07	FBpp0072306,FBpp0072438,FBpp0073966,FBpp0076408,FBpp0076487,FBpp0077208,FBpp0077473,FBpp0078326,FBpp0079677,FBpp0082682,FBpp0084050,FBpp0084351,FBpp0085888,FBpp0086382	Akt1,Chc,Dic61B,Exo84,Rab5,Sec5,Sec6,Sec8,Syx18,chico,msk,pbl,shark,zip
GO:0012505	endomembrane system	29	924	6.34e-07	FBpp0071431,FBpp0071905,FBpp0072616,FBpp0073659,FBpp0073966,FBpp0076408,FBpp0077208,FBpp0077399,FBpp0077473,FBpp0078007,FBpp0079278,FBpp0080048,FBpp0081156,FBpp0082137,FBpp0082139,FBpp0082568,FBpp0083502,FBpp0083646,FBpp0084050,FBpp0085658,FBpp0086705,FBpp0088945,FBpp0089084,FBpp0292260,FBpp0294035,FBpp0301099,FBpp0302596,FBpp0304479,FBpp0305729	AP-2alpha,AP-2mu,AP-2sigma,Chc,Cirl,Fer1HCH,Fs(2)Ket,Klp61F,Nup214,Nup93-1,Rab35,Rab5,Ref1,Rep,Rph,Sec23,Sec5,Slh,Syx18,Syx1A,Syx7,Tango7,Trn-SR,Vha55,beta'COP,emb,ldlCp,mbo,msk
GO:0071944	cell periphery	32	1225	6.13e-06	FBpp0071061,FBpp0071431,FBpp0072306,FBpp0073966,FBpp0076408,FBpp0076487,FBpp0077208,FBpp0077473,FBpp0078007,FBpp0078326,FBpp0079677,FBpp0079999,FBpp0082139,FBpp0082682,FBpp0083502,FBpp0083646,FBpp0084050,FBpp0084351,FBpp0085182,FBpp0085888,FBpp0086382,FBpp0086941,FBpp0087248,FBpp0088945,FBpp0089084,FBpp0291363,FBpp0292260,FBpp0297254,FBpp0300511,FBpp0300628,FBpp0304475,FBpp0305866	AP-2alpha,AP-2mu,AP-2sigma,Akt1,Amph,Chc,Cngl,Dop1R1,Exo84,Rab5,Rph,Sec5,Sec6,Sec8,Slh,Syx18,Syx1A,Syx7,Tsp47F,Vha55,Vha68-2,cher,chico,dpr2,kek6,mgl,msk,mys,pbl,shark,shi,zip
GO:0030120	vesicle coat	6	24	6.96e-06	FBpp0073966,FBpp0080048,FBpp0083502,FBpp0083646,FBpp0088945,FBpp0301099	AP-2alpha,AP-2mu,AP-2sigma,Chc,Sec23,beta'COP
GO:0030135	coated vesicle	7	42	7.75e-06	FBpp0073966,FBpp0077208,FBpp0080048,FBpp0083502,FBpp0083646,FBpp0088945,FBpp0301099	AP-2alpha,AP-2mu,AP-2sigma,Chc,Sec23,Sec5,beta'COP
GO:0043232	intracellular non-membrane-bounded organelle	35	1455	9.03e-06	FBpp0070672,FBpp0071061,FBpp0071562,FBpp0071848,FBpp0072306,FBpp0072438,FBpp0072616,FBpp0073173,FBpp0073572,FBpp0073828,FBpp0074298,FBpp0074756,FBpp0076806,FBpp0077134,FBpp0078013,FBpp0078318,FBpp0079680,FBpp0080121,FBpp0080622,FBpp0081467,FBpp0082137,FBpp0082516,FBpp0082964,FBpp0084144,FBpp0084831,FBpp0084900,FBpp0085658,FBpp0086591,FBpp0086705,FBpp0086853,FBpp0111818,FBpp0293235,FBpp0294035,FBp…	Bap60,Bub3,CG10333,CG11920,CG2051,CG4038,CG6094,CG6227,CG7794,Cdk12,Cdk9,D1,Dic61B,Dp,Fs(2)Ket,HP6,Hsc70-4,Klp61F,Nup358,Rep,RpII33,Rpd3,SMC2,TER94,Tango7,cher,ctp,mbo,mys,ncd,rept,scny,shi,wupA,zip
GO:0030659	cytoplasmic vesicle membrane	7	48	1.5e-05	FBpp0071431,FBpp0073966,FBpp0080048,FBpp0083502,FBpp0083646,FBpp0088945,FBpp0301099	AP-2alpha,AP-2mu,AP-2sigma,Chc,Rph,Sec23,beta'COP
GO:0030132	clathrin coat of coated pit	4	7	3.6e-05	FBpp0073966,FBpp0083502,FBpp0083646,FBpp0088945	AP-2alpha,AP-2mu,AP-2sigma,Chc
GO:0030136	clathrin-coated vesicle	5	19	3.87e-05	FBpp0073966,FBpp0077208,FBpp0083502,FBpp0083646,FBpp0088945	AP-2alpha,AP-2mu,AP-2sigma,Chc,Sec5
GO:0098805	whole membrane	12	227	4.71e-05	FBpp0071431,FBpp0073966,FBpp0074609,FBpp0077208,FBpp0079999,FBpp0080048,FBpp0082139,FBpp0083502,FBpp0083646,FBpp0088945,FBpp0301099,FBpp0305729	AP-2alpha,AP-2mu,AP-2sigma,Chc,Rab35,Rph,Sec23,Sec5,Vha55,Vha68-2,alphaSnap,beta'COP
GO:0000145	exocyst	4	8	4.9e-05	FBpp0077208,FBpp0078326,FBpp0084351,FBpp0085888	Exo84,Sec5,Sec6,Sec8
GO:1902494	catalytic complex	24	858	4.9e-05	FBpp0070402,FBpp0070672,FBpp0071562,FBpp0071848,FBpp0072438,FBpp0073173,FBpp0073572,FBpp0073893,FBpp0074756,FBpp0074822,FBpp0078013,FBpp0078664,FBpp0080121,FBpp0083434,FBpp0083975,FBpp0084021,FBpp0085295,FBpp0085658,FBpp0085902,FBpp0086603,FBpp0087921,FBpp0089041,FBpp0111818,FBpp0305561	Atg3,Atg6,Bap60,CG4038,CG5706,Cdc27,Cdk12,Cdk9,Cul1,CycK,Dic61B,Prosalpha7,Prp19,Rep,RpII33,Rpd3,Rpn11,Rpn6,TER94,crn,ctp,rept,shtd,slmb
GO:0008180	COP9 signalosome	4	10	8.99e-05	FBpp0074841,FBpp0082743,FBpp0083658,FBpp0303869	CSN1b,CSN5,CSN6,alien
GO:0030125	clathrin vesicle coat	4	10	8.99e-05	FBpp0073966,FBpp0083502,FBpp0083646,FBpp0088945	AP-2alpha,AP-2mu,AP-2sigma,Chc
GO:0005635	nuclear envelope	8	108	0.00018	FBpp0071905,FBpp0073659,FBpp0076408,FBpp0077399,FBpp0079278,FBpp0081156,FBpp0082137,FBpp0294035	Fs(2)Ket,Nup214,Nup93-1,Ref1,Trn-SR,emb,mbo,msk
GO:0005886	plasma membrane	26	1085	0.00022	FBpp0071061,FBpp0071431,FBpp0072306,FBpp0073966,FBpp0076487,FBpp0077208,FBpp0078007,FBpp0078326,FBpp0079677,FBpp0079999,FBpp0082139,FBpp0083502,FBpp0083646,FBpp0085182,FBpp0086382,FBpp0086941,FBpp0087248,FBpp0088945,FBpp0089084,FBpp0291363,FBpp0292260,FBpp0297254,FBpp0300511,FBpp0300628,FBpp0304475,FBpp0305866	AP-2alpha,AP-2mu,AP-2sigma,Amph,Chc,Cngl,Dop1R1,Rph,Sec5,Sec8,Slh,Syx1A,Syx7,Tsp47F,Vha55,Vha68-2,cher,chico,dpr2,kek6,mgl,mys,pbl,shark,shi,zip
GO:0045202	synapse	11	234	0.00027	FBpp0071061,FBpp0071431,FBpp0074609,FBpp0078326,FBpp0084050,FBpp0085658,FBpp0086941,FBpp0292260,FBpp0302596,FBpp0302752,FBpp0305866	Amph,Cirl,Rep,Rop,Rph,Sec8,Syx18,Syx1A,alphaSnap,mys,shi
GO:0016020	membrane	45	2553	0.00035	FBpp0071061,FBpp0071431,FBpp0072306,FBpp0073966,FBpp0074609,FBpp0076487,FBpp0076785,FBpp0077208,FBpp0077399,FBpp0078007,FBpp0078326,FBpp0079278,FBpp0079677,FBpp0079999,FBpp0080048,FBpp0081156,FBpp0082139,FBpp0082568,FBpp0083502,FBpp0083646,FBpp0083975,FBpp0084050,FBpp0085182,FBpp0085658,FBpp0085888,FBpp0086382,FBpp0086941,FBpp0087248,FBpp0087958,FBpp0088945,FBpp0089084,FBpp0291363,FBpp0292260,FBp…	AP-2alpha,AP-2mu,AP-2sigma,Amph,Atg6,CG10483,CG32547,CG8728,Chc,Cirl,Cngl,Dop1R1,Fs(2)Ket,Rab35,Ref1,Rep,Rop,Rph,Sec23,Sec5,Sec6,Sec8,Slh,Snmp1,Syx18,Syx1A,Syx7,Trn-SR,Tsp47F,Vha55,Vha68-2,alphaSnap,beta'COP,cher,chico,dpr2,emb,kek6,ldlCp,mgl,mys,pbl,shark,shi,zip
GO:0031981	nuclear lumen	22	857	0.00036	FBpp0070402,FBpp0071562,FBpp0071848,FBpp0073173,FBpp0073572,FBpp0073828,FBpp0074756,FBpp0076408,FBpp0076806,FBpp0077134,FBpp0078013,FBpp0078318,FBpp0080121,FBpp0080622,FBpp0081156,FBpp0082137,FBpp0082516,FBpp0082743,FBpp0084144,FBpp0084726,FBpp0084831,FBpp0294035	Bap60,Bub3,CG10333,CG11920,CG2051,CG4038,CG6227,CSN5,Cdk12,Cdk9,Cpsf100,Fs(2)Ket,HP6,Hsc70-4,Ref1,RpII33,Rpd3,crn,mbo,msk,rept,scny
GO:0044433	cytoplasmic vesicle part	8	125	0.00042	FBpp0071431,FBpp0073966,FBpp0080048,FBpp0083502,FBpp0083646,FBpp0088945,FBpp0301099,FBpp0305729	AP-2alpha,AP-2mu,AP-2sigma,Chc,Rab35,Rph,Sec23,beta'COP
GO:0030122	AP-2 adaptor complex	3	5	0.00044	FBpp0083502,FBpp0083646,FBpp0088945	AP-2alpha,AP-2mu,AP-2sigma
GO:0099023	tethering complex	5	42	0.00073	FBpp0077208,FBpp0078326,FBpp0082568,FBpp0084351,FBpp0085888	Exo84,Sec5,Sec6,Sec8,ldlCp
GO:0030139	endocytic vesicle	4	21	0.00074	FBpp0077473,FBpp0083502,FBpp0083646,FBpp0088945	AP-2alpha,AP-2mu,AP-2sigma,Rab5
GO:0005643	nuclear pore	5	44	0.00081	FBpp0071905,FBpp0073659,FBpp0079278,FBpp0082137,FBpp0294035	Fs(2)Ket,Nup214,Nup93-1,emb,mbo
GO:0070013	intracellular organelle lumen	24	1052	0.00081	FBpp0070402,FBpp0071562,FBpp0071848,FBpp0073173,FBpp0073572,FBpp0073828,FBpp0074756,FBpp0076408,FBpp0076806,FBpp0077134,FBpp0078013,FBpp0078318,FBpp0079680,FBpp0080121,FBpp0080622,FBpp0081156,FBpp0082137,FBpp0082516,FBpp0082743,FBpp0084144,FBpp0084726,FBpp0084831,FBpp0087958,FBpp0294035	Bap60,Bub3,CG10333,CG11920,CG2051,CG4038,CG6094,CG6227,CG8728,CSN5,Cdk12,Cdk9,Cpsf100,Fs(2)Ket,HP6,Hsc70-4,Ref1,RpII33,Rpd3,crn,mbo,msk,rept,scny
GO:0098796	membrane protein complex	15	487	0.00081	FBpp0071061,FBpp0073966,FBpp0077208,FBpp0078007,FBpp0079999,FBpp0080048,FBpp0082139,FBpp0083502,FBpp0083646,FBpp0083975,FBpp0084050,FBpp0088945,FBpp0292260,FBpp0300628,FBpp0301099	AP-2alpha,AP-2mu,AP-2sigma,Atg6,Chc,Cngl,Sec23,Sec5,Syx18,Syx1A,Syx7,Vha55,Vha68-2,beta'COP,mys
GO:0099080	supramolecular complex	8	144	0.00085	FBpp0071061,FBpp0072306,FBpp0072616,FBpp0074298,FBpp0082964,FBpp0084900,FBpp0085658,FBpp0304475	CG7794,Klp61F,Rep,cher,mys,ncd,wupA,zip
GO:1990904	ribonucleoprotein complex	15	491	0.00085	FBpp0070402,FBpp0071562,FBpp0072908,FBpp0073828,FBpp0079680,FBpp0080138,FBpp0080622,FBpp0081484,FBpp0082817,FBpp0082994,FBpp0084144,FBpp0085902,FBpp0111818,FBpp0294035,FBpp0294043	AGO1,CG10333,CG11920,CG11985,CG16941,CG17737,CG4038,CG6094,CG6227,Fs(2)Ket,Prp19,Smg5,TER94,crn,eIF-1A
GO:0030133	transport vesicle	6	75	0.00094	FBpp0071431,FBpp0073966,FBpp0085658,FBpp0292260,FBpp0301099,FBpp0302596	Chc,Cirl,Rep,Rph,Sec23,Syx1A
GO:0098588	bounding membrane of organelle	11	287	0.0011	FBpp0071431,FBpp0073966,FBpp0074609,FBpp0079999,FBpp0080048,FBpp0082139,FBpp0083502,FBpp0083646,FBpp0088945,FBpp0301099,FBpp0305729	AP-2alpha,AP-2mu,AP-2sigma,Chc,Rab35,Rph,Sec23,Vha55,Vha68-2,alphaSnap,beta'COP
GO:0098797	plasma membrane protein complex	8	152	0.0011	FBpp0071061,FBpp0073966,FBpp0077208,FBpp0079999,FBpp0082139,FBpp0083502,FBpp0083646,FBpp0088945	AP-2alpha,AP-2mu,AP-2sigma,Chc,Sec5,Vha55,Vha68-2,mys
GO:0044459	plasma membrane part	19	781	0.0018	FBpp0071061,FBpp0072306,FBpp0073966,FBpp0076487,FBpp0077208,FBpp0078326,FBpp0079999,FBpp0082139,FBpp0083502,FBpp0083646,FBpp0085182,FBpp0086382,FBpp0086941,FBpp0087248,FBpp0088945,FBpp0291363,FBpp0297254,FBpp0300511,FBpp0300628	AP-2alpha,AP-2mu,AP-2sigma,Amph,Chc,Cngl,Dop1R1,Sec5,Sec8,Tsp47F,Vha55,Vha68-2,dpr2,kek6,mgl,mys,pbl,shark,zip
GO:0000307	cyclin-dependent protein kinase holoenzyme complex	3	11	0.0019	FBpp0071848,FBpp0078013,FBpp0085295	Cdk12,Cdk9,CycK
GO:0005829	cytosol	14	495	0.0028	FBpp0070457,FBpp0074822,FBpp0079677,FBpp0079874,FBpp0082682,FBpp0082787,FBpp0082994,FBpp0083683,FBpp0086705,FBpp0089217,FBpp0302752,FBpp0304202,FBpp0305182,FBpp0305302	Akt1,Atg3,CG12264,CG3806,Cctgamma,EF2,Elf,Rop,T-cp1,Tango7,chico,eIF-1A,eIF2B-beta,eRF1
GO:0031965	nuclear membrane	4	33	0.0028	FBpp0077399,FBpp0079278,FBpp0081156,FBpp0294035	Fs(2)Ket,Ref1,Trn-SR,emb
GO:0048471	perinuclear region of cytoplasm	5	63	0.0031	FBpp0073966,FBpp0076408,FBpp0082139,FBpp0085658,FBpp0294043	AGO1,Chc,Rep,Vha55,msk
GO:0098793	presynapse	7	138	0.0032	FBpp0071061,FBpp0071431,FBpp0074609,FBpp0085658,FBpp0292260,FBpp0302596,FBpp0302752	Cirl,Rep,Rop,Rph,Syx1A,alphaSnap,mys
GO:0099512	supramolecular fiber	7	140	0.0034	FBpp0071061,FBpp0072306,FBpp0072616,FBpp0074298,FBpp0082964,FBpp0084900,FBpp0304475	CG7794,Klp61F,cher,mys,ncd,wupA,zip
GO:0031090	organelle membrane	17	707	0.0038	FBpp0071431,FBpp0073966,FBpp0074609,FBpp0077399,FBpp0079278,FBpp0079999,FBpp0080048,FBpp0081156,FBpp0082139,FBpp0083502,FBpp0083646,FBpp0087958,FBpp0088945,FBpp0294035,FBpp0301099,FBpp0305729,FBpp0305866	AP-2alpha,AP-2mu,AP-2sigma,CG8728,Chc,Fs(2)Ket,Rab35,Ref1,Rph,Sec23,Trn-SR,Vha55,Vha68-2,alphaSnap,beta'COP,emb,shi
GO:0005798	Golgi-associated vesicle	4	39	0.0043	FBpp0073966,FBpp0080048,FBpp0089084,FBpp0301099	Chc,Sec23,Slh,beta'COP
GO:0044427	chromosomal part	14	524	0.0043	FBpp0071848,FBpp0073173,FBpp0073572,FBpp0074756,FBpp0077134,FBpp0078013,FBpp0078318,FBpp0080121,FBpp0081467,FBpp0082137,FBpp0082516,FBpp0084831,FBpp0086591,FBpp0086853	Bap60,Bub3,CG2051,Cdk12,Cdk9,D1,Dp,HP6,Hsc70-4,RpII33,Rpd3,SMC2,mbo,rept
GO:0099503	secretory vesicle	5	69	0.0043	FBpp0071431,FBpp0073966,FBpp0085658,FBpp0292260,FBpp0302596	Chc,Cirl,Rep,Rph,Syx1A
GO:1990234	transferase complex	13	470	0.0047	FBpp0071848,FBpp0073173,FBpp0073893,FBpp0074756,FBpp0074822,FBpp0078013,FBpp0080121,FBpp0083434,FBpp0083975,FBpp0085295,FBpp0085658,FBpp0087921,FBpp0305561	Atg3,Atg6,Cdc27,Cdk12,Cdk9,Cul1,CycK,Rep,RpII33,Rpd3,rept,shtd,slmb
GO:0008024	cyclin/CDK positive transcription elongation factor complex	2	3	0.0049	FBpp0071848,FBpp0078013	Cdk12,Cdk9
GO:1990498	mitotic spindle microtubule	2	3	0.0049	FBpp0072616,FBpp0084900	Klp61F,ncd
GO:0005681	spliceosomal complex	5	75	0.0056	FBpp0070402,FBpp0073828,FBpp0081484,FBpp0082817,FBpp0085902	CG11985,CG16941,CG6227,Prp19,crn
GO:0005856	cytoskeleton	12	427	0.0061	FBpp0070672,FBpp0072306,FBpp0072438,FBpp0072616,FBpp0074298,FBpp0082964,FBpp0084900,FBpp0085658,FBpp0086705,FBpp0293235,FBpp0304475,FBpp0305866	CG7794,Dic61B,Klp61F,Nup358,Rep,Tango7,cher,ctp,ncd,shi,wupA,zip
GO:0044430	cytoskeletal part	11	369	0.0062	FBpp0070672,FBpp0072306,FBpp0072438,FBpp0072616,FBpp0074298,FBpp0082964,FBpp0084900,FBpp0085658,FBpp0086705,FBpp0293235,FBpp0305866	CG7794,Dic61B,Klp61F,Nup358,Rep,Tango7,ctp,ncd,shi,wupA,zip
GO:0016282	eukaryotic 43S preinitiation complex	2	4	0.0068	FBpp0072908,FBpp0082994	CG17737,eIF-1A
GO:0044448	cell cortex part	5	83	0.0082	FBpp0072306,FBpp0077208,FBpp0078326,FBpp0084351,FBpp0085888	Exo84,Sec5,Sec6,Sec8,zip
GO:0044615	nuclear pore nuclear basket	2	5	0.0093	FBpp0071905,FBpp0073659	Nup214,Nup93-1
GO:0031201	SNARE complex	3	23	0.0095	FBpp0078007,FBpp0084050,FBpp0292260	Syx18,Syx1A,Syx7
GO:0008021	synaptic vesicle	4	53	0.0106	FBpp0071431,FBpp0085658,FBpp0292260,FBpp0302596	Cirl,Rep,Rph,Syx1A
GO:0030016	myofibril	4	54	0.0112	FBpp0071061,FBpp0072306,FBpp0074298,FBpp0304475	cher,mys,wupA,zip
GO:0072686	mitotic spindle	3	25	0.0112	FBpp0072616,FBpp0084900,FBpp0305866	Klp61F,ncd,shi
GO:0005851	eukaryotic translation initiation factor 2B complex	2	6	0.0113	FBpp0070457,FBpp0089217	CG3806,eIF2B-beta
GO:0071012	catalytic step 1 spliceosome	2	6	0.0113	FBpp0070402,FBpp0085902	Prp19,crn
GO:0005654	nucleoplasm	11	411	0.012	FBpp0070402,FBpp0071848,FBpp0073173,FBpp0074756,FBpp0076408,FBpp0078013,FBpp0080121,FBpp0081156,FBpp0082137,FBpp0084726,FBpp0084831	Bub3,Cdk12,Cdk9,Cpsf100,Ref1,RpII33,Rpd3,crn,mbo,msk,rept
GO:0030658	transport vesicle membrane	3	26	0.012	FBpp0071431,FBpp0073966,FBpp0301099	Chc,Rph,Sec23
GO:0030660	Golgi-associated vesicle membrane	3	26	0.012	FBpp0073966,FBpp0080048,FBpp0301099	Chc,Sec23,beta'COP
GO:0097458	neuron part	11	413	0.0122	FBpp0071061,FBpp0071431,FBpp0073572,FBpp0074609,FBpp0078326,FBpp0082682,FBpp0085658,FBpp0292260,FBpp0302596,FBpp0302752,FBpp0306056	Akt1,Bap60,Cirl,Rep,Rop,Rph,Sec8,Snmp1,Syx1A,alphaSnap,mys
GO:0044449	contractile fiber part	4	57	0.0123	FBpp0071061,FBpp0072306,FBpp0074298,FBpp0304475	cher,mys,wupA,zip
GO:0000502	proteasome complex	4	60	0.0142	FBpp0078664,FBpp0086603,FBpp0089041,FBpp0111818	Prosalpha7,Rpn11,Rpn6,TER94
GO:0000221	vacuolar proton-transporting V-type ATPase, V1 domain	2	8	0.0161	FBpp0079999,FBpp0082139	Vha55,Vha68-2
GO:0005818	aster	2	8	0.0161	FBpp0072616,FBpp0085658	Klp61F,Rep
GO:0005832	chaperonin-containing T-complex	2	8	0.0161	FBpp0082787,FBpp0083683	Cctgamma,T-cp1
GO:0032154	cleavage furrow	3	31	0.0169	FBpp0072306,FBpp0076487,FBpp0086941	Amph,pbl,zip
GO:0045169	fusome	3	32	0.0182	FBpp0072616,FBpp0111818,FBpp0304479	Fer1HCH,Klp61F,TER94
GO:0005794	Golgi apparatus	8	266	0.0204	FBpp0072616,FBpp0073966,FBpp0080048,FBpp0082568,FBpp0086705,FBpp0089084,FBpp0301099,FBpp0304479	Chc,Fer1HCH,Klp61F,Sec23,Slh,Tango7,beta'COP,ldlCp
GO:0070864	sperm individualization complex	2	10	0.0219	FBpp0086705,FBpp0305866	Tango7,shi
GO:0016028	rhabdomere	3	35	0.0221	FBpp0077208,FBpp0078326,FBpp0085888	Sec5,Sec6,Sec8
GO:0000785	chromatin	9	335	0.0238	FBpp0073173,FBpp0073572,FBpp0074756,FBpp0077134,FBpp0078318,FBpp0081467,FBpp0082137,FBpp0082516,FBpp0086591	Bap60,CG2051,D1,HP6,Hsc70-4,Rpd3,SMC2,mbo,rept
GO:0009925	basal plasma membrane	2	11	0.0248	FBpp0071061,FBpp0078326	Sec8,mys
GO:0031967	organelle envelope	10	407	0.0274	FBpp0071905,FBpp0073659,FBpp0076408,FBpp0077399,FBpp0079278,FBpp0081156,FBpp0082137,FBpp0087958,FBpp0294035,FBpp0305866	CG8728,Fs(2)Ket,Nup214,Nup93-1,Ref1,Trn-SR,emb,mbo,msk,shi
GO:0000974	Prp19 complex	2	12	0.0278	FBpp0070402,FBpp0085902	Prp19,crn
GO:0005703	polytene chromosome puff	3	39	0.0278	FBpp0071848,FBpp0078013,FBpp0080121	Cdk12,Cdk9,RpII33
GO:0008541	proteasome regulatory particle, lid subcomplex	2	12	0.0278	FBpp0078664,FBpp0086603	Rpn11,Rpn6
GO:0015630	microtubule cytoskeleton	8	285	0.0278	FBpp0070672,FBpp0072438,FBpp0072616,FBpp0082964,FBpp0084900,FBpp0085658,FBpp0293235,FBpp0305866	CG7794,Dic61B,Klp61F,Nup358,Rep,ctp,ncd,shi
GO:0031523	Myb complex	2	12	0.0278	FBpp0073173,FBpp0086853	Dp,Rpd3
GO:0098687	chromosomal region	6	182	0.0336	FBpp0071848,FBpp0073173,FBpp0077134,FBpp0078013,FBpp0080121,FBpp0084831	Bub3,Cdk12,Cdk9,HP6,RpII33,Rpd3
GO:0005719	nuclear euchromatin	2	14	0.0338	FBpp0073572,FBpp0077134	Bap60,HP6
GO:0070603	SWI/SNF superfamily-type complex	3	45	0.0365	FBpp0073173,FBpp0073572,FBpp0074756	Bap60,Rpd3,rept
GO:0005680	anaphase-promoting complex	2	15	0.0372	FBpp0073893,FBpp0305561	Cdc27,shtd
GO:0044425	membrane part	30	2011	0.0391	FBpp0071061,FBpp0071431,FBpp0072306,FBpp0073966,FBpp0076487,FBpp0076785,FBpp0077208,FBpp0078007,FBpp0078326,FBpp0079999,FBpp0080048,FBpp0082139,FBpp0083502,FBpp0083646,FBpp0083975,FBpp0084050,FBpp0085182,FBpp0086382,FBpp0086941,FBpp0087248,FBpp0088945,FBpp0291363,FBpp0292260,FBpp0297254,FBpp0300511,FBpp0300628,FBpp0301099,FBpp0302596,FBpp0302752,FBpp0304652	AP-2alpha,AP-2mu,AP-2sigma,Amph,Atg6,CG10483,CG32547,Chc,Cirl,Cngl,Dop1R1,Rop,Rph,Sec23,Sec5,Sec8,Syx18,Syx1A,Syx7,Tsp47F,Vha55,Vha68-2,beta'COP,dpr2,kek6,mgl,mys,pbl,shark,zip
GO:0005773	vacuole	5	138	0.0405	FBpp0074609,FBpp0074822,FBpp0079999,FBpp0082139,FBpp0111818	Atg3,TER94,Vha55,Vha68-2,alphaSnap
GO:0005852	eukaryotic translation initiation factor 3 complex	2	16	0.0405	FBpp0070430,FBpp0086705	CG8636,Tango7
GO:0005700	polytene chromosome	6	193	0.0408	FBpp0071848,FBpp0073173,FBpp0077134,FBpp0078013,FBpp0080121,FBpp0081467	Cdk12,Cdk9,D1,HP6,RpII33,Rpd3
GO:0033181	plasma membrane proton-transporting V-type ATPase complex	2	17	0.0442	FBpp0079999,FBpp0082139	Vha55,Vha68-2
GO:0005769	early endosome	3	50	0.0447	FBpp0077473,FBpp0078007,FBpp0082139	Rab5,Syx7,Vha55
GO:0005819	spindle	4	93	0.0447	FBpp0072616,FBpp0084900,FBpp0085658,FBpp0305866	Klp61F,Rep,ncd,shi
GO:0030017	sarcomere	3	50	0.0447	FBpp0072306,FBpp0074298,FBpp0304475	cher,wupA,zip
GO:0150034	distal axon	4	94	0.0454	FBpp0074609,FBpp0078326,FBpp0292260,FBpp0302752	Rop,Sec8,Syx1A,alphaSnap
GO:0030141	secretory granule	2	18	0.0467	FBpp0071431,FBpp0073966	Chc,Rph
GO:0000151	ubiquitin ligase complex	5	148	0.0493	FBpp0073893,FBpp0074822,FBpp0083434,FBpp0087921,FBpp0305561	Atg3,Cdc27,Cul1,shtd,slmb
